# Supplementary material for: Intergenic and Repeat Transcription in Human, Chimpanzee and Macaque Brains Measured by RNA-Seq
Source: PLoS Comput Biol. 2010 Jul 1;6(7):e1000843. doi: 10.1371/journal.pcbi.1000843 (PMC2895644; doi:10.1371/journal.pcbi.1000843)
Supplement: Table S1 — Sample information (0.02 MB XLS) [file pcbi.1000843.s019.xls]

## Sheet: Sheet1
Table S1. Sample information.
Pooled sample	Species	Ethnicity	Brain region	Age (years)	RIN*	Sex
Human1	Homo sapiens	Caucasian	Cerebellum	8	8.8	Male
Human1	Homo sapiens	Caucasian	Cerebellum	16	8.2	Male
Human1	Homo sapiens	Caucasian	Cerebellum	20	8.9	Male
Human1	Homo sapiens	African American	Cerebellum	25	9.2	Male
Human1	Homo sapiens	Caucasian	Cerebellum	53	7.9	Male
Human2	Homo sapiens	Caucasian	Cerebellum	16	9.1	Male
Human2	Homo sapiens	African American	Cerebellum	12	8.1	Male
Human2	Homo sapiens	Caucasian	Cerebellum	21	8.3	Male
Human2	Homo sapiens	Caucasian	Cerebellum	27	8.9	Male
Human2	Homo sapiens	Caucasian	Cerebellum	54	7.4	Male
Macaque	Rhesus macaque	n.a.	Cerebellum	4	8.2	Male
Macaque	Rhesus macaque	n.a.	Cerebellum	6	8.5	Male
Macaque	Rhesus macaque	n.a.	Cerebellum	7	8.6	Male
Macaque	Rhesus macaque	n.a.	Cerebellum	10	8.1	Male
Macaque	Rhesus macaque	n.a.	Cerebellum	20	8.7	Male
Chimp	Pan troglodytes	n.a.	Cerebellum	8	6.3	Male
Chimp	Pan troglodytes	n.a.	Cerebellum	12	7.9	Male
Chimp	Pan troglodytes	n.a.	Cerebellum	12	7.5	Male
Chimp	Pan troglodytes	n.a.	Cerebellum	40	7.4	Male
* RNA Integrity Number determined by Agilent Bioanalyzer assay.
