# Supplementary material for: Intergenic and Repeat Transcription in Human, Chimpanzee and Macaque Brains Measured by RNA-Seq
Source: PLoS Comput Biol. 2010 Jul 1;6(7):e1000843. doi: 10.1371/journal.pcbi.1000843 (PMC2895644; doi:10.1371/journal.pcbi.1000843)
Supplement: Table S3 — Genomic coordinates, category and EST overlap of igHTR (0.18 MB XLS) [file pcbi.1000843.s021.xls]

## Sheet: Sheet1
Table S3. Genomic coordinates, category and EST overlap of igHTR.
A. igHTR from Human1.
Chromosome	Start	End	Category	EST Overlap
chr5	10491623	10492194	3' UTR	Yes
chr7	78929764	78930039	lincRNA	Yes
chr19	7842144	7842724	coding	Yes
chr17	21944821	21944880	--	--
chrX	124128925	124129655	--	--
chr4	24132128	24132691	lincRNA	Yes
chr4	156606372	156606412	--	--
chr20	30053563	30054288	EvoFold	Yes
chr2	70741696	70741903	3' UTR	Yes
chr7	153163871	153164593	--	--
chr8	102273691	102274279	lincRNA	--
chr8	10374856	10375112	3' UTR	Yes
chr17	43325758	43325797	--	--
chr8	38250395	38251554	coding	Yes
chr8	102273018	102273506	coding	--
chr20	46570974	46571015	--	--
chr7	140066036	140066637	lincRNA	Yes
chr3	21908157	21908836	--	--
chrX	73374712	73378349	coding	Yes
chr16	47918877	47920294	lincRNA	--
chr4	57025907	57025947	--	Yes
chr12	13594055	13595078	3' UTR	Yes
chr11	133287002	133287500	lincRNA	--
chr3	22096714	22097072	--	--
chr4	119507598	119507636	--	--
chr15	22823510	22824194	lincRNA	Yes
chr8	102254905	102255299	lincRNA	Yes
chr3	115520920	115521327	coding	Yes
chr9	15160374	15160885	--	Yes
chr12	130994686	130994729	--	Yes
chr2	187336831	187338235	3' UTR	Yes
chr2	120456145	120456482	EvoFold	Yes
chr7	87664390	87667320	EvoFold	Yes
chr15	22955571	22957342	--	--
chrX	110546958	110547004	--	--
chr5	20584356	20585033	lincRNA	--
chr4	61835605	61836446	--	--
chr8	10328375	10328941	3' UTR	Yes
chr14	77778561	77779081	5' UTR	Yes
chr4	11007350	11008043	coding	Yes
chr3	21935038	21935633	--	--
chr3	23996282	23996671	3' UTR	Yes
chr1	64649446	64649489	--	--
chr16	47903598	47904567	coding	--
chr16	47916713	47917210	coding	--
chr8	28973771	28974318	lincRNA	Yes
chr5	80270962	80271008	--	--
chr12	58461750	58463108	3' UTR	Yes
chr15	22794978	22795380	lincRNA	Yes
chr8	102270966	102271660	coding	--
chr4	61792669	61793492	EvoFold	--
chr3	21905193	21905738	--	--
chr5	20604692	20605106	lincRNA	--
chr3	115529326	115530063	lincRNA	--
chr3	115523971	115524667	lincRNA	Yes
chr4	90380947	90381372	--	--
chr7	26194020	26195076	3' UTR	Yes
chr3	115526658	115528344	coding	Yes
chr17	24897959	24898649	EvoFold	Yes
chr3	35656107	35656947	coding	Yes
chr11	27867055	27867846	coding	--
chr17	75271690	75271797	--	--
chr3	22131935	22132576	--	--
chr3	22175524	22176330	--	--
chr6	64483459	64483983	3' UTR	--
chr11	94540102	94540679	EvoFold	Yes
chr2	70742054	70742466	3' UTR	Yes
chr20	34097439	34097959	lincRNA	Yes
chr15	22819567	22819765	lincRNA	--
chr2	166247256	166247873	3' UTR	Yes
chr17	33920958	33921798	3' UTR	Yes
chr3	22051385	22053011	--	--
chr7	45258095	45258228	--	Yes
chr14	80714313	80715034	EvoFold	Yes
chrX	142543236	142543532	EvoFold	Yes
chr8	10789235	10790098	3' UTR	--
chrX	154302280	154302408	--	--
chr9	67913766	67914132	--	Yes
chr5	20560313	20560809	--	--
chr1	217484866	217484904	--	--
chr8	81707547	81707996	3' UTR	Yes
chr6	34363131	34363973	EvoFold	Yes
chr3	148568983	148569441	--	--
chr11	106061035	106061587	3' UTR	Yes
chr17	33813261	33814677	coding	Yes
chr4	45945934	45946324	3' UTR	Yes
chr9	72334631	72335914	lincRNA	Yes
chr17	17036007	17036254	3' UTR	Yes
chr17	76979710	76980315	lincRNA	Yes
chr12	111241415	111241918	coding	Yes
chr9	110932801	110933549	3' UTR	Yes
chr8	140692854	140693457	3' UTR	Yes
chr7	87667528	87669833	EvoFold	Yes
chr15	22885637	22886103	lincRNA	Yes
chr15	22818405	22819044	lincRNA	Yes
chr12	97520374	97520958	3' UTR	Yes
chrX	55226387	55226694	--	--
chr3	121024234	121024761	EvoFold	Yes
chrX	74877504	74877822	coding	--
chr10	94918148	94918188	--	--
chr8	81705640	81706845	3' UTR	Yes
chr3	21876887	21877433	--	--
chr14	56828604	56829139	EvoFold	Yes
chr6	34096839	34097578	EvoFold	Yes
chr3	22039767	22040352	--	--
chr1	161318231	161318272	3' UTR	--
chr8	10351865	10352106	3' UTR	--
chr12	47811768	47812198	5' UTR	Yes
chr12	79712441	79715252	--	Yes
chr12	13599777	13600374	3' UTR	Yes
chr1	17706614	17706654	--	--
chr3	197562073	197562720	3' UTR	Yes
chr16	47892018	47893267	lincRNA	--
chr17	24900789	24901443	EvoFold	Yes
chr8	17126786	17127707	3' UTR	Yes
chr4	79148747	79148918	--	--
chr8	131606641	131606677	--	--
chr20	44368719	44369245	--	--
chr17	52300289	52300921	--	Yes
chr2	236701680	236701988	--	Yes
chr17	2571701	2572297	--	Yes
chr2	64682228	64682267	3' UTR	--
chr17	45013807	45014754	3' UTR	Yes
chr5	20585710	20586522	lincRNA	--
chr2	156106028	156106625	EvoFold	--
chr16	47893651	47894008	lincRNA	--
chr18	42504744	42505868	3' UTR	Yes
chr17	21947691	21947991	--	--
chr5	148854611	148855022	EvoFold	Yes
chr5	20595726	20596184	lincRNA	--
chr3	3267397	3267435	--	--
chr4	134856391	134856428	--	--
chr18	42504046	42504375	3' UTR	Yes
chr1	200365285	200365568	3' UTR	Yes
chr17	33811322	33812068	EvoFold	Yes
chr3	115519797	115520638	lincRNA	Yes
chr12	13596290	13596851	3' UTR	Yes
chr1	65298334	65298657	lincRNA	--
chr20	34099125	34099752	lincRNA	Yes
chr4	142003670	142004109	lincRNA	Yes
chr5	10490514	10491053	3' UTR	Yes
chr3	22095964	22096590	--	--
chr5	140628490	140628533	--	--
chr8	10361725	10362326	3' UTR	--
chr11	769231	769895	5' UTR	Yes
chr22	49397575	49398056	3' UTR	Yes
chr7	142053899	142054036	--	--
chr14	76875660	76876994	--	Yes
chr2	126286274	126286314	--	--
chr20	57859696	57860089	3' UTR	--
chr7	49924164	49924873	3' UTR	Yes
chr19	2239828	2240146	3' UTR	--
chr15	22820668	22823019	lincRNA	Yes
chr3	21811644	21812564	--	--
chr5	20604119	20604550	lincRNA	Yes
chr7	140817167	140817882	EvoFold	--
chr4	186306512	186307906	--	Yes
chr17	46187447	46188003	3' UTR	Yes
chr5	150947422	150948082	--	--
chr3	22104303	22105336	--	--
chrX	46184737	46184833	--	--
chr11	44675337	44675375	--	--
chr8	10353160	10353492	3' UTR	--
chr11	94541258	94543138	EvoFold	Yes
chr16	33873810	33873863	--	--
chr11	74648988	74651269	coding	Yes
chr18	4386384	4386913	lincRNA	--
chr3	115518568	115519672	lincRNA	Yes
chr1	236173787	236173848	--	--
chr15	22899833	22900199	lincRNA	Yes
chr4	177488871	177489337	3' UTR	Yes
chr1	22294946	22295060	lincRNA	--
chr6	136704284	136705165	3' UTR	Yes
chr6	34095341	34095880	EvoFold	Yes
chr10	73684126	73684165	lincRNA	--
chr3	180436504	180437449	coding	Yes
chr6	137597539	137597578	--	--
chr6	123432383	123432981	3' UTR	Yes
chr11	72789943	72791681	EvoFold	Yes
chr2	203680516	203680958	coding	--
chr5	20397118	20397608	--	--
chr15	52057804	52058482	--	Yes
chr8	10393260	10394011	coding	Yes
chr8	30161771	30162159	lincRNA	--
chr18	65661376	65662182	--	--
chr17	53115930	53116680	EvoFold	Yes
chr4	87154357	87155157	3' UTR	Yes
chr6	34093498	34095156	coding	Yes
chr3	162272235	162273500	3' UTR	Yes
chr3	141774313	141774756	--	Yes
chr3	157141921	157142280	--	Yes
chr9	136252702	136252746	--	--
chr10	93797674	93798313	EvoFold	Yes
chr15	22814038	22815388	lincRNA	Yes
chr17	46186837	46187318	3' UTR	Yes
chr3	21925574	21926958	--	--
chr5	123124857	123125091	--	--
chr8	10370660	10371126	3' UTR	Yes
chr11	122806630	122807175	--	--
chr2	120457699	120458402	EvoFold	Yes
chr11	17713139	17713747	coding	Yes
chr1	144404715	144405309	coding	--
chr10	46425938	46426324	3' UTR	Yes
chr8	17130565	17130904	3' UTR	Yes
chr14	100461185	100461792	lincRNA	--
chr5	87620333	87620744	lincRNA	--
chr16	47923300	47923774	lincRNA	Yes
chr3	21958889	21959719	--	--
chr3	185429974	185430572	--	Yes
chr3	22181914	22182687	--	--
chr14	25983967	25984911	EvoFold	Yes
chr15	22929466	22930190	--	--
chr1	231876024	231876778	3' UTR	--
chr5	179275187	179275684	lincRNA	Yes
chr8	10332821	10333173	3' UTR	Yes
chr18	65664109	65664791	--	Yes
chr3	26728548	26729408	coding	Yes
chr3	22062018	22062833	--	--
chrX	124131316	124132291	--	--
chr8	17124652	17126345	3' UTR	Yes
chr14	83708267	83708729	--	--
chr3	157140101	157140945	--	--
chr5	20573700	20574268	lincRNA	--
chr3	22174688	22175349	--	--
chr16	47886422	47887363	lincRNA	Yes
chr16	47924459	47924764	lincRNA	--
chr14	81452588	81452916	coding	--
chr17	53429515	53430086	3' UTR	--
chr5	20606486	20606850	lincRNA	--
chr3	97819878	97820047	--	Yes
chr4	177486560	177487076	3' UTR	Yes
chr2	120451524	120452557	EvoFold	Yes
chr11	119712776	119713103	coding	--
chrX	73372752	73373622	lincRNA	--
chr13	41705634	41706942	lincRNA	Yes
chr3	22176735	22177470	--	--
chr3	22015407	22016045	--	--
chr9	5259157	5259194	--	--
chr5	10489184	10489530	3' UTR	Yes
chr8	10358252	10359282	3' UTR	--
chr4	90382962	90384419	coding	Yes
chr11	47444126	47444725	coding	Yes
chr17	21946598	21947474	coding	--
chr17	53522268	53523032	EvoFold	Yes
chr3	148617218	148617748	EvoFold	--
chr4	78243002	78243045	--	--
chr11	10486004	10487267	--	Yes
chr3	22179694	22180699	--	--
chr5	20159886	20160498	--	--
chrX	55225016	55225312	--	Yes
chr5	20528108	20528935	--	--
chr3	21952045	21952718	--	--
chr15	42326566	42326609	--	--
chr5	62029942	62029985	--	--
chr17	76980733	76981532	coding	Yes
chrX	124055752	124056189	EvoFold	--
chr17	17033695	17035769	coding	Yes
chr11	72793439	72794138	EvoFold	Yes
chr4	156604970	156605099	--	Yes
chr13	41712167	41712779	lincRNA	Yes
chr2	114185579	114186352	--	Yes
chr13	84311336	84311373	--	--
chr9	110935075	110935441	3' UTR	Yes
chr2	126737022	126737060	--	--
chr6	62341990	62342511	--	Yes
chr20	30052187	30052468	EvoFold	Yes
chr11	64966965	64967710	lincRNA	--
chr8	11556972	11557016	--	--
chr5	87601654	87602572	lincRNA	Yes
chr2	216783190	216784098	3' UTR	Yes
chr4	22736206	22736262	--	--
chr11	133283778	133284320	coding	--
chr7	118549102	118549140	--	--
chr8	141606113	141607440	--	Yes
chrY	4272815	4272902	--	--
chr14	70263941	70264489	3' UTR	Yes
chr3	22081609	22082234	--	--
chrX	114479327	114479369	--	--
chr6	166241703	166242244	--	--
chr19	3417248	3417934	3' UTR	Yes
chr6	166194934	166195438	--	--
chr9	67907281	67907941	--	Yes
chr19	63071101	63071579	--	Yes
chr1	25801066	25801493	--	--
chr5	20540993	20541913	--	--
chr12	107701228	107702664	coding	Yes
chr16	72720867	72720911	--	--
chr14	80715411	80715957	EvoFold	Yes
chr16	47878443	47879094	coding	--
chr16	79193688	79194157	EvoFold	Yes
chr3	22137657	22138148	--	--
chr10	46421587	46422420	3' UTR	Yes
chr8	102253877	102254405	lincRNA	Yes
chrY	10643490	10643567	--	--
chr8	10756042	10756624	EvoFold	--
chr3	21862463	21863446	--	--
chr4	142002538	142003284	lincRNA	Yes
chr3	22173892	22174490	--	--
chr8	9800078	9800693	lincRNA	Yes
chr3	22134162	22135496	--	--
chr14	99048571	99049377	3' UTR	Yes
chr11	107882997	107883804	3' UTR	Yes
chr9	19500992	19502429	3' UTR	Yes
chr17	33812536	33813079	EvoFold	Yes
chr7	140819885	140820627	EvoFold	Yes
chrX	124114017	124114821	--	--
chr9	86829352	86830774	3' UTR	Yes
chr11	133281106	133282017	lincRNA	--
chr4	12251029	12251318	coding	--
chr12	32423070	32424667	3' UTR	Yes
chr16	33868772	33868919	--	--
chr2	120455060	120456018	EvoFold	Yes
chr8	10751511	10752192	EvoFold	Yes
chr19	60945756	60945802	--	--
chr17	46185868	46186328	3' UTR	Yes
chr11	74651540	74652082	3' UTR	Yes
chrX	139688848	139689688	5' UTR	Yes
chr11	33519926	33520395	coding	--
chr10	64895929	64896651	coding	--
chr3	22375024	22375540	lincRNA	--
chr6	28300309	28300359	--	--
chr11	128342320	128342758	3' UTR	Yes
chr11	64311767	64312205	--	--
chr16	47889114	47889649	lincRNA	--
chr8	140691574	140692127	3' UTR	--
chrX	73359506	73359846	lincRNA	--
chr2	120453637	120453975	EvoFold	Yes
chr16	47876527	47877780	coding	Yes
chr17	17029702	17030284	3' UTR	Yes
chr8	10391507	10392290	3' UTR	--
chr3	115521827	115522203	lincRNA	--
chr12	50191905	50192807	--	Yes
chr3	117008011	117009581	EvoFold	Yes
chr17	53523163	53523792	coding	Yes
chr12	17028142	17028189	--	--
chr5	20553759	20554585	--	--
chr14	76658543	76659237	coding	--
chr3	21821560	21822231	--	--
chrX	24471823	24472496	lincRNA	--
chr8	102272085	102272288	lincRNA	--
chr3	21979399	21980174	--	--
chr2	230337544	230338917	EvoFold	Yes
chr17	19443209	19443263	--	--
chr7	140069780	140070043	lincRNA	Yes
chr17	75526446	75527053	3' UTR	Yes
chr14	75743964	75744897	3' UTR	Yes
chr16	3361121	3361274	--	--
chr18	42507670	42508216	3' UTR	Yes
chr3	175484167	175484791	coding	--
chr14	20746033	20746843	3' UTR	Yes
chr17	63714160	63715132	--	Yes
chr5	20060666	20061159	--	--
chr1	79392581	79392620	--	--
chr8	10372068	10372479	3' UTR	Yes
chr3	21911349	21911802	--	--
chr17	63636024	63636435	5' UTR	Yes
chr14	43439095	43439136	--	--
chr8	10762733	10763422	EvoFold	--
chr3	97551220	97551436	--	Yes
chr15	40820444	40821028	3' UTR	Yes
chr9	110936669	110937485	3' UTR	Yes
chrX	46185048	46185097	--	Yes
chr8	81712123	81713048	3' UTR	Yes
chr9	19276765	19276991	coding	--
chrX	73378465	73379150	lincRNA	--
chr3	22060618	22061059	--	Yes
chr15	77373585	77373957	--	--
chr12	50189483	50189825	--	--
chr2	70739876	70740489	3' UTR	Yes
chr8	10340719	10341198	3' UTR	--
chr7	129560867	129561892	coding	Yes
chr15	22796086	22797103	lincRNA	Yes
chr15	73813303	73813841	--	--
chr8	10759784	10760438	EvoFold	Yes
chr5	20550251	20551053	--	--
chr3	149651182	149651226	--	--
chr11	94539226	94539855	EvoFold	Yes
chr12	111819806	111820327	EvoFold	Yes
chr19	7842856	7843347	coding	Yes
chr3	177531466	177531512	lincRNA	--
chr9	17792540	17792939	3' UTR	--
chr3	115536727	115537476	lincRNA	Yes
chr15	22884433	22885008	lincRNA	--
chr18	5266606	5266646	--	--
chr11	72792802	72793294	EvoFold	Yes
chr1	182558434	182558479	--	--
chr3	21949749	21950306	--	--
chr11	2202737	2202790	--	--
chr20	34100821	34101051	lincRNA	Yes
chr15	22836862	22837114	lincRNA	--
chr16	47879958	47880426	lincRNA	Yes
chr3	117004311	117005802	EvoFold	Yes
chr16	47885258	47886022	lincRNA	--
chr16	47926870	47927501	coding	Yes
chr2	25307237	25307739	--	--
chr3	148464679	148465189	EvoFold	--
chr3	22388664	22389246	--	--
chr3	22006883	22007928	--	--
chr3	22184983	22185512	coding	--
chr3	22132792	22133326	--	--
chr2	85422028	85422366	coding	Yes
chr9	135432504	135433010	--	Yes
chr5	20496317	20496930	--	--
chr14	74373935	74374365	3' UTR	--
chr3	22029388	22030333	--	--
chr3	22164957	22165536	--	--
chr9	86830911	86831507	3' UTR	Yes
chr14	20740965	20741844	3' UTR	Yes
chr8	79793094	79794109	coding	Yes
chr11	65299352	65299801	--	Yes
chr3	22030520	22031055	--	--
chr3	115532189	115533218	lincRNA	--
chr4	160349782	160349823	lincRNA	--
chr20	46912725	46912760	--	--
chr1	228522794	228523385	3' UTR	--
chr3	22082581	22082953	--	--
chr2	132731589	132731802	--	Yes
chr8	141607696	141608126	--	Yes
chr15	22816832	22818212	lincRNA	--
chr11	102433847	102434584	--	Yes
chr3	121024886	121025382	EvoFold	Yes
chr18	54218617	54219023	--	Yes
chr17	34666204	34666724	3' UTR	--
chr1	54464300	54464766	EvoFold	Yes
chr15	39380709	39381636	lincRNA	Yes
chr1	65299791	65301178	lincRNA	--
chr11	123001680	123003748	3' UTR	Yes
chr5	67557898	67558208	5' UTR	Yes
chr2	95884868	95885491	coding	Yes
chr5	20572757	20573102	lincRNA	--
chr17	46185119	46185725	3' UTR	Yes
chr7	140071076	140071640	lincRNA	Yes
chr3	22169512	22169855	--	--
chr15	22911108	22911372	lincRNA	Yes
chr3	22314200	22314859	lincRNA	--
chr7	65975914	65975960	lincRNA	--
chr15	22959072	22959409	--	--
chr3	21912208	21913289	--	Yes
chr11	122998735	123001487	coding	Yes
chr3	70257073	70258000	coding	Yes
chr20	34099916	34100431	lincRNA	Yes
chr3	22162179	22163003	--	--
chr3	117009946	117011735	coding	Yes
chr10	103856860	103857307	3' UTR	Yes
chr16	47887664	47888367	lincRNA	Yes
chr15	22794371	22794826	lincRNA	Yes
chr17	75527814	75528351	3' UTR	Yes
chr5	20520906	20522531	--	--
chr3	117006006	117006576	EvoFold	Yes
chr6	166234080	166234621	--	--
chr3	115530199	115531227	lincRNA	--
chr1	5832902	5833096	--	--
chrX	139690814	139691054	5' UTR	Yes
chr4	142004762	142005671	coding	Yes
chrX	73372195	73372631	lincRNA	--
chr14	56827294	56827833	EvoFold	Yes
chr6	82146533	82146573	--	--
chr2	95560125	95560449	--	Yes
chr20	61283596	61284003	--	--
chr1	65304020	65304524	lincRNA	--
chr8	79678043	79678917	3' UTR	Yes
chr12	92422978	92423383	--	Yes
chr5	20597697	20598108	lincRNA	--
chr3	21918189	21918789	--	--
chr6	166206173	166206735	--	--
chr3	86200650	86205345	EvoFold	Yes
chr7	153092215	153092539	--	--
chr6	139905602	139905640	lincRNA	--
chr7	153185721	153186916	--	--
chr3	21922745	21923640	--	--
chr1	65303139	65303585	coding	--
chr5	19508338	19508847	3' UTR	Yes
chr7	140070353	140070935	lincRNA	Yes
chr8	32990749	32990938	lincRNA	--
chr1	168542818	168542859	--	--
chr8	10368238	10369126	3' UTR	Yes
chr8	52347600	52347648	--	--
chr12	13595201	13595959	3' UTR	Yes
chr3	22093215	22095230	--	--
chr11	31762274	31762628	coding	Yes
chr14	76664945	76665760	lincRNA	--
chr2	74234938	74235413	--	Yes
chr5	87602937	87603609	lincRNA	--
chr8	10752351	10752946	EvoFold	Yes
chr5	20489826	20490423	--	--
chr1	66988894	66989336	coding	Yes
chr2	152397948	152398440	--	Yes
chr8	79792513	79792964	3' UTR	Yes
chr4	156604648	156604825	--	Yes
chr8	140682543	140682928	3' UTR	Yes
chr3	157142951	157143338	--	--
chr9	67909975	67910827	--	Yes
chr17	21945966	21946426	--	--
chr18	54216979	54217646	coding	Yes
chr15	22906841	22908908	lincRNA	Yes
chr12	111820462	111821059	EvoFold	Yes
chr17	59925115	59926003	EvoFold	Yes
chr8	38385253	38386721	3' UTR	Yes
chr3	22164368	22164814	--	--
chr3	115517150	115517985	lincRNA	Yes
chr5	20522668	20523092	--	--
chr7	140067506	140069220	lincRNA	Yes
chr20	34101687	34102276	lincRNA	Yes
chr8	122751881	122751923	--	--
chr6	166240934	166241479	--	--
chr14	23964736	23965183	3' UTR	Yes
chr15	22961715	22962107	--	--
chr14	99049551	99050015	3' UTR	Yes
chr8	102259408	102260277	lincRNA	--
chr2	120454128	120454908	EvoFold	Yes
chr5	6546836	6547464	3' UTR	Yes
chr3	21914568	21915270	--	Yes
chr15	22793549	22794208	lincRNA	Yes
chr14	80713553	80713932	EvoFold	Yes
chr15	22881978	22882693	lincRNA	--
chr3	198789231	198789767	5' UTR	Yes
chr8	10341793	10342929	3' UTR	--
chr4	135535318	135535367	--	--
chr8	10383093	10384026	3' UTR	Yes
chr12	112066489	112066532	--	--
chr3	22085945	22086762	--	Yes
chr15	22791576	22793163	lincRNA	Yes
chr5	20530187	20531395	--	--
chr14	20743111	20744040	3' UTR	Yes
chr4	117438771	117438869	--	--
chr3	22115791	22116361	--	--
chr11	47446268	47446507	EvoFold	Yes
chr15	22790893	22791274	lincRNA	Yes
chr1	24738245	24739401	3' UTR	Yes
chr5	18061322	18061372	--	--
chr7	153192855	153193062	--	--
chr7	78928825	78929301	lincRNA	--
chr4	90381583	90382845	--	Yes
chr4	9800600	9800636	lincRNA	--
chr17	19442935	19442987	--	--
chr16	47902233	47902700	lincRNA	--
chr4	47123306	47123831	--	--
chr8	75678262	75679190	--	Yes
chrY	10647611	10647845	--	Yes
chr3	148458476	148458833	EvoFold	--
chr9	19505165	19505609	3' UTR	--
chr15	56940162	56940638	3' UTR	Yes
chr2	150263157	150263196	--	--
chr11	11937476	11938907	3' UTR	Yes
chr16	47904711	47905965	coding	--
chr15	56937287	56939104	3' UTR	Yes
chr6	79701853	79702574	EvoFold	Yes
chr2	227295222	227295376	--	--
chr14	76653424	76653870	lincRNA	--
chr2	152399111	152402366	coding	Yes
chr8	10788410	10789022	3' UTR	--
chr5	20087774	20088494	--	--
chr8	81711230	81711698	coding	Yes
chr15	40821468	40821948	3' UTR	Yes
chr8	10775562	10776084	--	--
chr3	21913894	21914437	--	Yes
chr3	115522341	115523845	coding	Yes
chr2	156092720	156093248	--	--
chr3	121025597	121027969	EvoFold	Yes
chr14	57531791	57532452	3' UTR	Yes
chr16	46947428	46948011	3' UTR	Yes
chr11	82368457	82369166	coding	Yes
chr8	32988593	32988647	lincRNA	--
chr6	117024338	117025005	--	Yes
chr8	10375797	10376565	3' UTR	Yes
chr3	22163240	22163674	--	--
chr3	197448576	197449090	--	Yes
chr16	14919976	14920235	--	--
chr14	70261664	70262214	3' UTR	Yes
chr3	139856444	139856917	coding	Yes
chr12	96478474	96478931	coding	--
chr3	22129608	22130164	--	--
chr1	53483270	53483736	--	--
chr8	10758431	10759251	EvoFold	--
chr2	156110442	156112014	EvoFold	--
chr12	112218320	112219191	3' UTR	Yes
chr5	20068915	20069370	--	--
chr19	3415951	3417036	3' UTR	Yes
chr11	120575730	120575773	--	--
chr11	72791843	72792674	EvoFold	Yes
chr3	22166510	22166867	--	--
chr12	39750370	39752256	3' UTR	Yes
chr16	31626596	31627784	coding	Yes
chr15	22797394	22798206	lincRNA	Yes
chr5	20594417	20595243	lincRNA	--
chr5	20591940	20592950	lincRNA	Yes
chr10	64946081	64947357	coding	--
chr3	26730109	26730482	--	--
chr9	86828484	86829184	3' UTR	Yes
chr15	22930922	22931429	--	--
chr9	110934431	110934711	coding	Yes
chr9	72337338	72337920	lincRNA	Yes
chr8	10390175	10390994	coding	--
chr7	153168510	153169271	--	--
chr15	22941332	22941728	--	--
chr5	20546388	20546701	--	--
chr3	21847166	21847542	--	--
chr14	25982879	25983200	EvoFold	--
chr13	85867396	85867436	--	--
chr5	20262685	20263280	--	--
chr15	22789845	22790600	lincRNA	Yes
chr1	240184110	240184148	--	--
chr8	38387188	38387809	coding	Yes
chr3	21983767	21984293	--	--
chr3	118360942	118361099	--	--
chr15	91243351	91243787	lincRNA	Yes
chr22	48980282	48980715	--	Yes
chr16	73042599	73043251	coding	--
chr10	64900937	64901463	lincRNA	--
chr17	17030764	17033036	3' UTR	Yes
chr8	10761577	10762562	EvoFold	--
chr3	22090450	22091012	--	--
chr19	3418935	3419581	3' UTR	Yes
chr2	165957683	165958223	3' UTR	--
chr11	133282327	133282771	lincRNA	--
chr9	138862181	138862724	5' UTR	Yes
chr15	22831339	22832065	lincRNA	Yes
chr2	95558319	95559065	--	Yes
chr3	115533671	115534316	lincRNA	--
chr17	53115132	53115531	EvoFold	Yes
chr3	22158900	22159222	--	--
chr7	72751357	72751404	EvoFold	--
chr17	48538092	48538744	coding	Yes
chr5	20536269	20537158	--	--
chr15	22959543	22960377	--	--
chr17	39750923	39751429	coding	Yes
chr11	133282895	133283634	lincRNA	--
chr2	120453121	120453519	EvoFold	Yes
chr3	21859362	21860381	--	--
chr5	20552440	20553038	--	--
chr3	115535631	115536567	lincRNA	Yes
chr7	142054896	142054962	--	--
chr16	12917344	12917389	--	--
chr7	78935555	78936146	lincRNA	--
chr8	102252694	102253310	lincRNA	Yes
chr14	25983334	25983819	EvoFold	Yes
chr6	117023647	117024201	--	Yes
chr11	106059503	106060859	3' UTR	Yes
chr16	47889985	47890571	lincRNA	Yes
chr5	20610416	20611506	lincRNA	Yes
chr5	20576401	20577763	lincRNA	--
chr17	53521812	53522100	EvoFold	Yes
chr5	86723510	86724920	EvoFold	Yes
chr8	57146531	57147033	--	Yes
chr15	39382010	39384702	coding	Yes
chr16	47877971	47878226	lincRNA	Yes
chr3	115524846	115526534	coding	--
chr3	85090941	85091439	coding	Yes
chr8	10378349	10379275	3' UTR	--
chr6	123427639	123429139	3' UTR	Yes
chr3	22127362	22128236	--	Yes
chr15	39385004	39385966	lincRNA	Yes
chr2	122530246	122530286	--	--
chr3	21884895	21885413	--	--
chr3	22114126	22114423	--	--
chr7	104422152	104422667	lincRNA	--
chr18	8694664	8695181	5' UTR	--
chr5	20558690	20559313	--	--
chr3	22171980	22172655	--	--
chr16	47915689	47916592	lincRNA	--
chr18	42502067	42503738	3' UTR	Yes
chr12	50491223	50491651	EvoFold	Yes
chr13	78785636	78786195	lincRNA	Yes
chr3	198810746	198811074	--	--
chr1	196120224	196120728	--	--
chr12	91052452	91053022	coding	--
chr7	153167133	153167525	--	--
chr12	44405934	44406520	lincRNA	Yes
chr13	41704243	41704696	lincRNA	Yes
chr7	153201612	153202177	--	--
chr11	11939705	11940125	3' UTR	Yes
chr5	82385345	82386108	3' UTR	Yes
chr8	47861774	47861819	--	--
chr1	47440810	47440850	--	--
chr9	67908073	67908562	--	--
chr16	47888535	47888957	lincRNA	Yes
chr11	63434005	63434515	EvoFold	Yes
chrX	124063415	124063911	EvoFold	--
chr3	122626526	122626772	3' UTR	--
chr3	22167592	22167997	--	--
chr5	20607194	20608895	lincRNA	--
chr3	22177850	22178400	--	--
chr4	55889074	55889215	--	--
chr8	40362346	40362384	--	--
chr12	58464944	58465679	coding	--
chr12	55199875	55199912	--	--
chr12	79711580	79712310	--	Yes
chr16	47881822	47885092	lincRNA	Yes
chr14	23066455	23066805	--	--
chr11	96944638	96944680	--	--
chr14	61641919	61642467	--	--
chr14	71276636	71277086	EvoFold	Yes
chr2	156093574	156093820	--	--
chr7	65200443	65200487	--	--
chrX	73370665	73371367	lincRNA	Yes
chr16	79192869	79193256	EvoFold	Yes
chr4	90377935	90378645	--	Yes
chr10	69268630	69268676	--	--
chr13	108874470	108874706	--	Yes
chr14	70113068	70113528	lincRNA	--
chr2	70737756	70739476	coding	Yes
chr3	22170347	22171532	--	--
chr16	73040523	73041231	--	Yes
chrX	73356052	73356635	lincRNA	--
chr12	68904716	68905229	--	--
chr18	4335610	4336092	--	--
chr4	146516469	146516843	coding	Yes
chr3	22088275	22089123	--	--
chr19	3073253	3074554	--	Yes
chr12	56497540	56498051	coding	Yes
chr18	42510403	42510824	3' UTR	Yes
chr3	22320580	22321178	lincRNA	--
chr17	26119972	26120210	EvoFold	Yes
chr11	74652228	74653388	3' UTR	Yes
chr3	198818764	198819251	--	Yes
chr9	19503287	19503768	3' UTR	Yes
chrX	73381134	73381815	lincRNA	Yes
chr15	66267626	66268983	coding	Yes
chrX	71418802	71418851	5' UTR	--
chrX	73382929	73383849	lincRNA	Yes
chr2	143565098	143565214	--	--
chr8	47861227	47861447	--	--
chr3	21842652	21843244	--	--
chrX	73353690	73354500	lincRNA	Yes
chr15	39377561	39378088	lincRNA	Yes
chr5	179272763	179273702	lincRNA	Yes
chr7	142054421	142054756	--	--
chr4	177487949	177488736	3' UTR	Yes
chr13	52167932	52168551	--	--
chr15	22836160	22836518	lincRNA	--
chr17	19445436	19445618	--	--
chr12	92058320	92058357	--	--
chr11	47444847	47445658	EvoFold	Yes
chr8	38248480	38249116	5' UTR	Yes
chr6	80835946	80836225	coding	--
chr6	2979886	2979936	--	--
chr2	156112309	156113102	coding	--
chrX	55224696	55224878	--	--
chr2	104254606	104254644	--	--
chr16	47907883	47908297	lincRNA	--
chr18	42508479	42509022	3' UTR	Yes
chr19	57579931	57580368	coding	Yes
chr16	58288870	58288909	--	--
chr11	74653545	74653779	3' UTR	Yes
chr20	34101307	34101452	lincRNA	Yes
chr4	93230303	93230360	--	--
chr3	162276769	162277223	3' UTR	Yes
chrX	124103051	124103343	--	--
chrX	73367544	73368871	lincRNA	--
chr19	20029716	20029755	--	--
chr14	99050697	99051257	3' UTR	Yes
chr3	22112870	22113282	--	--
chr9	67914293	67914730	--	Yes
chr5	20599604	20599840	lincRNA	--
chr3	14960337	14960729	5' UTR	Yes
chr17	64753069	64753635	--	Yes
chr22	16415393	16416482	3' UTR	Yes
chr5	99413009	99413231	coding	--
chr1	4747829	4748335	--	--
chr7	78927167	78928099	lincRNA	Yes
chr6	64490290	64490609	3' UTR	--
chr5	20203420	20203649	--	--
chr5	139463080	139463118	--	--
chr3	115516475	115516997	lincRNA	Yes
chr8	77276746	77276905	--	--
chr15	22905499	22906628	lincRNA	Yes
chr16	78024667	78024747	--	--
chr10	10768277	10768322	--	--
chr1	236174835	236174876	--	--
chr9	67915074	67915471	--	--
chr2	117497569	117497733	--	--
chr3	22368766	22369175	lincRNA	--
chr7	49925578	49926385	3' UTR	Yes
chr3	148316574	148317085	--	--
chr2	156156505	156156853	--	--
chr12	76489928	76490441	--	--
chr5	28087138	28087195	--	--
chr15	22824512	22827073	lincRNA	Yes
chr14	83124543	83124787	--	--
chr14	20742218	20742846	3' UTR	Yes
chr3	22074541	22075070	--	--
chr2	236703509	236704044	--	Yes
chr9	19503916	19505044	coding	Yes
chr14	100445331	100445763	lincRNA	--
chr15	56939227	56939766	3' UTR	Yes
chr3	21860821	21861492	--	--
chr15	61223974	61224023	--	--
chr4	90380379	90380792	--	--
chr4	27341144	27341294	--	--
chr5	179278874	179279966	coding	Yes
chr3	148512015	148512622	EvoFold	--
chr3	22365705	22366159	lincRNA	--
chr5	179273865	179274213	lincRNA	Yes
chr8	28968228	28968879	coding	Yes
chr13	64939637	64939987	lincRNA	--
chr11	94543272	94545686	EvoFold	Yes
chr9	110935846	110936295	3' UTR	Yes
chr1	236175515	236175703	--	--
chr15	66269157	66269976	EvoFold	Yes
chr5	20502553	20502980	--	--
chr2	183495009	183495486	lincRNA	--
chr22	44820109	44820803	lincRNA	--
chr12	50489051	50491098	coding	Yes
chr14	76657326	76657827	lincRNA	Yes
chr3	40480911	40481289	--	--
chr13	41709496	41709808	lincRNA	Yes
chr5	10490060	10490384	3' UTR	Yes
chr5	63943878	63944417	3' UTR	Yes
chr8	10764188	10764775	EvoFold	--
chr15	22904112	22904494	lincRNA	Yes
chr7	61415796	61415838	--	--
chr5	36135659	36136628	3' UTR	Yes
chr4	61801727	61802036	EvoFold	--
chr16	33873079	33873595	--	--
chr4	105834612	105834903	--	--
chr19	63311536	63312161	--	Yes
chr3	21974057	21974569	--	--
chr4	76829397	76829444	--	--
chr15	43245957	43246483	3' UTR	--
chr17	11405273	11405863	3' UTR	Yes
chr3	157138285	157139603	--	Yes
chr8	10392584	10393093	coding	Yes
chr4	103935054	103936104	EvoFold	Yes
chr1	231185788	231186277	coding	Yes
chr1	200366250	200366792	3' UTR	Yes
chr7	142053106	142053372	--	--
chr3	115538641	115539013	lincRNA	--
chr12	92325663	92326205	3' UTR	Yes
chr16	47874207	47876124	coding	--
chrX	65464962	65465007	--	--
chr10	46423127	46423566	3' UTR	Yes
chr2	156107395	156109236	EvoFold	--
chr3	97818718	97819733	--	Yes
chr2	211696736	211696778	--	--
chr5	36911599	36912189	EvoFold	Yes
chr1	110476462	110476506	--	--
chr11	106062367	106063032	3' UTR	Yes
chrX	74878027	74878663	coding	Yes
chr2	120456618	120457435	EvoFold	Yes
chr3	22058911	22060010	--	--
chr6	123429259	123431592	3' UTR	Yes
chr12	107168759	107169166	3' UTR	--
chr7	141151437	141151620	--	--
chr8	10369274	10370072	coding	Yes
chr7	140072026	140072696	lincRNA	Yes
chr6	166205589	166206012	--	--
chr1	206046667	206047119	lincRNA	--
chr15	39378791	39380474	lincRNA	Yes
chr3	21895225	21896502	--	--
chr5	20560963	20561583	--	--
chr8	9798465	9799111	lincRNA	Yes
chrX	73369504	73370000	lincRNA	--
chr15	22829131	22831136	lincRNA	Yes
chr5	785290	785841	--	Yes
chr16	47900075	47900762	lincRNA	--
chrX	139691810	139692219	5' UTR	Yes
chr8	10377881	10378207	3' UTR	Yes
chr17	33809621	33811195	coding	Yes
chr12	65996336	65996898	3' UTR	--
chr15	22954850	22955362	--	--
chr3	170958257	170958297	--	--
chr15	22809424	22809729	lincRNA	Yes
chr17	63638078	63638502	5' UTR	Yes
chr5	99415729	99415930	coding	Yes
chr14	20745111	20745906	3' UTR	--
chr5	20594002	20594285	lincRNA	--
chrX	139695438	139695874	5' UTR	Yes
chr4	11006496	11007225	--	Yes
chr2	95561058	95561539	--	Yes
chr8	10340194	10340590	3' UTR	Yes
chrX	124093084	124093474	--	--
chr7	117620912	117621379	--	Yes
chr2	166252094	166252641	3' UTR	Yes
chr3	198819384	198820261	--	--
chr4	87152638	87153250	3' UTR	Yes
chr11	62237422	62237985	3' UTR	Yes
chr17	44535056	44535092	--	--
chr11	5224522	5224565	--	--
chr2	37616508	37616552	--	--
chr9	72338765	72339196	lincRNA	Yes
chr3	117006714	117007868	EvoFold	Yes
chr11	10487420	10488016	--	Yes
chr3	21955093	21955490	--	--
B. igHTR from Human2.
Chromosome	Start	End	Category	EST Overlap
chr8	47861775	47861841	--	--
chr3	86200661	86201258	EvoFold	Yes
chr12	107704614	107705050	EvoFold	Yes
chr5	20595482	20595989	lincRNA	--
chr1	236174836	236174880	--	--
chr6	79703698	79704447	EvoFold	Yes
chr2	95559283	95560065	--	Yes
chr11	106055848	106056353	3' UTR	Yes
chr17	39750926	39751449	coding	Yes
chr3	115538541	115539088	lincRNA	--
chr14	20744221	20744507	3' UTR	Yes
chr4	57025907	57025947	5' UTR	Yes
chr8	10751859	10752967	EvoFold	Yes
chr22	49397653	49398113	3' UTR	Yes
chr4	119507598	119507636	--	--
chr2	148406605	148407382	3' UTR	Yes
chr14	70262923	70264582	coding	Yes
chr18	42502084	42503338	3' UTR	Yes
chr12	58464538	58464815	3' UTR	--
chr8	79678057	79678999	3' UTR	Yes
chr4	185179662	185180346	EvoFold	Yes
chr20	34097427	34097992	lincRNA	Yes
chr15	22823508	22824191	lincRNA	Yes
chr5	87602320	87602901	lincRNA	--
chr3	21886585	21887314	--	--
chr7	149211463	149212015	3' UTR	Yes
chr3	21958553	21959602	--	--
chr4	989245	989628	3' UTR	Yes
chr8	10369199	10369678	--	Yes
chr3	21912461	21912819	--	Yes
chr16	47903585	47904688	lincRNA	--
chr1	64649446	64649489	--	--
chr14	20740967	20741834	3' UTR	Yes
chrX	46347195	46347862	--	Yes
chr2	219167269	219167977	3' UTR	Yes
chr19	57578911	57579287	5' UTR	Yes
chr3	157142905	157143432	3' UTR	--
chr6	79706383	79706852	EvoFold	Yes
chr9	19503212	19504471	EvoFold	Yes
chr16	47918969	47919393	lincRNA	--
chr3	115516470	115516962	lincRNA	Yes
chr3	157141951	157142241	3' UTR	Yes
chr3	22164722	22165538	--	--
chr1	47440807	47440850	--	--
chr3	14960306	14960754	5' UTR	Yes
chr11	62237600	62237958	--	Yes
chr3	22089298	22089683	--	--
chr10	103856430	103857130	3' UTR	--
chr14	20742246	20742850	3' UTR	Yes
chr3	21800323	21801028	--	--
chr18	8695946	8696493	coding	--
chr1	245419690	245419729	lincRNA	--
chr20	34099304	34099754	lincRNA	Yes
chr14	25982671	25984916	EvoFold	Yes
chr16	47886433	47887316	lincRNA	Yes
chr11	107881738	107882378	3' UTR	Yes
chr15	66269413	66269986	EvoFold	Yes
chr4	170878965	170879532	EvoFold	Yes
chrX	73367601	73368195	lincRNA	--
chr3	122626347	122626859	3' UTR	--
chr15	56937047	56938292	3' UTR	Yes
chr8	10368234	10368602	--	Yes
chr7	78932670	78933295	lincRNA	Yes
chr2	143564973	143565157	--	--
chr2	120451527	120451855	EvoFold	--
chr16	47902249	47902667	lincRNA	--
chr17	17029679	17030262	3' UTR	Yes
chr3	21932204	21932883	--	--
chr11	74649921	74651321	coding	Yes
chr3	22181833	22182829	--	--
chr11	107884492	107884881	3' UTR	--
chr9	86828436	86829207	3' UTR	Yes
chr8	9798461	9799116	lincRNA	Yes
chr14	83708268	83708374	--	--
chr16	33868770	33868919	--	--
chr11	65299390	65299807	--	Yes
chr5	20479319	20479705	--	--
chr8	17130582	17131006	3' UTR	Yes
chr3	21926443	21927154	--	--
chr5	36138714	36138966	3' UTR	Yes
chr8	141606384	141607232	--	Yes
chr16	47875126	47876116	lincRNA	--
chr22	30997604	30998128	coding	Yes
chr17	41012221	41012757	lincRNA	--
chr11	5224522	5224566	--	--
chr7	78929890	78930271	lincRNA	Yes
chr4	115036586	115037076	3' UTR	--
chr4	160349782	160349822	lincRNA	--
chr15	38404232	38404638	EvoFold	Yes
chr12	130994686	130994731	--	Yes
chr1	26670398	26671210	coding	Yes
chr17	77794691	77795069	--	Yes
chr1	231876383	231876747	3' UTR	--
chr11	769257	769731	5' UTR	Yes
chr8	56601320	56602079	EvoFold	--
chr3	21919389	21919985	--	--
chr2	227295220	227295388	--	--
chr8	28972500	28972782	lincRNA	Yes
chr1	144405613	144406343	--	Yes
chr20	57859903	57860232	3' UTR	--
chr5	20586951	20587681	lincRNA	--
chr8	52347603	52347647	--	--
chr2	187336762	187337339	3' UTR	Yes
chr2	203680595	203681114	coding	--
chr6	123431777	123432262	3' UTR	Yes
chr14	54327443	54327923	EvoFold	Yes
chr3	115527464	115528957	coding	Yes
chr18	5134381	5134985	--	--
chr5	36136280	36136733	3' UTR	Yes
chr5	20610338	20610780	lincRNA	--
chr3	22177741	22178444	--	--
chr3	22374607	22375054	lincRNA	--
chr12	50191788	50193398	--	Yes
chr1	65298531	65299398	lincRNA	--
chr15	22906294	22906862	lincRNA	--
chr17	46185084	46186598	coding	Yes
chr3	115535361	115536020	lincRNA	Yes
chr5	20597611	20598297	lincRNA	--
chr15	66267686	66269271	coding	Yes
chr16	10184165	10184725	5' UTR	Yes
chr17	26119979	26120191	EvoFold	Yes
chr3	21969352	21970106	--	Yes
chr1	65303777	65304853	lincRNA	--
chr8	93180708	93181386	5' UTR	Yes
chr15	22965438	22966056	coding	--
chr12	58461754	58462856	3' UTR	Yes
chr3	21909726	21910811	--	--
chr5	20262486	20262920	--	--
chr17	11405545	11406106	3' UTR	Yes
chr6	2979886	2979939	--	--
chr19	2239545	2240761	3' UTR	--
chr1	1524022	1524780	--	Yes
chr5	20604615	20605161	lincRNA	--
chr7	129259289	129259762	--	Yes
chr3	155279550	155279589	--	--
chrX	55226387	55226592	--	--
chr3	22094586	22095226	--	--
chr14	56828695	56829400	EvoFold	Yes
chr11	47444437	47444994	EvoFold	Yes
chr15	22907972	22908877	lincRNA	Yes
chr2	216779295	216779706	3' UTR	--
chr15	22797552	22797911	lincRNA	Yes
chr4	135535318	135535365	--	--
chr9	72336180	72336940	coding	Yes
chr5	20496325	20497714	--	--
chr15	39378792	39380476	lincRNA	Yes
chr5	20571944	20572663	lincRNA	--
chr3	97819874	97820040	--	Yes
chr5	20558974	20559398	lincRNA	--
chr7	78927053	78928102	lincRNA	Yes
chr2	40865593	40865759	lincRNA	--
chr11	35788057	35789217	coding	Yes
chr15	61223974	61224019	--	--
chr4	141906286	141906324	5' UTR	--
chr14	99048893	99049349	3' UTR	Yes
chr2	117497577	117497673	--	--
chr2	122530246	122530287	--	--
chr7	153186430	153186935	--	--
chr15	38404806	38405532	coding	Yes
chr17	21945928	21946397	--	--
chr4	117438823	117439006	--	--
chrY	4272812	4272898	--	--
chr11	133288609	133289191	3' UTR	--
chr16	47891989	47893276	lincRNA	--
chr10	10768279	10768324	--	--
chr3	21914013	21914554	--	Yes
chr3	157138647	157139134	3' UTR	Yes
chr3	22176744	22177603	--	--
chr3	22184196	22184666	--	--
chr16	47888588	47889275	lincRNA	Yes
chr3	22093202	22093641	--	--
chr9	67910900	67911350	--	--
chr17	70368925	70369429	5' UTR	Yes
chrX	139690744	139691545	3' UTR	Yes
chr3	22385463	22385911	lincRNA	--
chr22	40640642	40640832	lincRNA	Yes
chr17	48538083	48538744	coding	Yes
chrX	74877503	74878114	coding	--
chr4	156604966	156605100	--	Yes
chr3	140558637	140559121	3' UTR	Yes
chr3	21846721	21847198	--	--
chr6	123427312	123430682	3' UTR	Yes
chr4	156604718	156604798	--	Yes
chr11	106060263	106060823	3' UTR	Yes
chr11	119712555	119713125	coding	Yes
chr6	166188782	166189615	--	--
chr16	47887738	47888359	lincRNA	Yes
chr5	148854305	148854695	EvoFold	Yes
chr17	33812582	33812988	EvoFold	Yes
chr15	22816826	22818213	lincRNA	--
chr5	20265716	20266175	--	--
chr7	87664398	87670142	EvoFold	Yes
chr18	12057400	12057849	coding	Yes
chr3	22387917	22389255	lincRNA	--
chr8	17124659	17127753	3' UTR	Yes
chr8	144754259	144754730	--	Yes
chr17	39198464	39198827	3' UTR	Yes
chr8	10393400	10393687	--	Yes
chr17	21947792	21947982	--	--
chr3	22164308	22164527	--	--
chr3	21433191	21433684	3' UTR	--
chr20	34099914	34100374	lincRNA	Yes
chr8	40047280	40047370	--	--
chr11	105426087	105426486	3' UTR	Yes
chr2	70741712	70742399	3' UTR	Yes
chr11	33519921	33520233	coding	--
chr4	11006897	11007917	3' UTR	Yes
chr3	117009998	117011745	coding	Yes
chr12	32423951	32425036	3' UTR	Yes
chr12	20726047	20726563	3' UTR	Yes
chr20	26137783	26138297	--	Yes
chr8	103493684	103494096	coding	--
chr16	47907928	47908330	lincRNA	--
chr15	22957798	22958430	--	--
chr11	10486003	10487260	--	Yes
chr9	86829363	86830859	3' UTR	Yes
chr12	107703983	107704299	EvoFold	Yes
chr11	63433698	63434830	EvoFold	Yes
chr5	20554293	20554882	lincRNA	--
chr11	7448308	7448882	3' UTR	--
chr19	3074146	3074893	3' UTR	Yes
chr14	20743632	20744052	3' UTR	Yes
chr5	94067062	94067646	3' UTR	--
chr3	115522927	115525780	coding	Yes
chr11	72789900	72791441	EvoFold	Yes
chr12	94226441	94227004	EvoFold	Yes
chr13	41705608	41706138	lincRNA	Yes
chr1	236175518	236175680	--	--
chr15	40818834	40819543	--	Yes
chr6	123432421	123432935	3' UTR	Yes
chr3	22180259	22180631	--	--
chr15	73813383	73814019	--	--
chr12	39750362	39752230	3' UTR	Yes
chr11	130246090	130246861	lincRNA	Yes
chr12	92325704	92326218	3' UTR	Yes
chr5	179278787	179280025	coding	Yes
chr15	52057900	52058524	coding	Yes
chrX	124061731	124062210	--	--
chr11	74652237	74653347	3' UTR	Yes
chr16	47879900	47880678	lincRNA	Yes
chr3	22086015	22086790	--	Yes
chr14	80712863	80713199	EvoFold	--
chr14	76665284	76665669	lincRNA	--
chr3	21927396	21927869	--	--
chr15	89247190	89247661	5' UTR	Yes
chr3	117007757	117009558	EvoFold	Yes
chr7	140066936	140067335	lincRNA	Yes
chr9	138862144	138862766	5' UTR	Yes
chr15	39382007	39384721	coding	Yes
chr17	76976612	76977707	lincRNA	Yes
chr18	25679277	25679318	--	--
chr3	170958257	170958294	--	--
chr15	22824505	22827116	lincRNA	Yes
chr11	122998729	123001490	coding	Yes
chr8	141603053	141604422	coding	Yes
chr8	10390807	10391840	--	--
chr17	24900098	24900989	EvoFold	Yes
chr3	22022148	22023050	--	--
chr3	115520781	115521253	coding	Yes
chr5	20568041	20568747	lincRNA	--
chr3	86202082	86202645	EvoFold	Yes
chr2	155019666	155020452	3' UTR	Yes
chr10	69268630	69268669	--	--
chr7	119700014	119700597	coding	Yes
chr16	47926932	47927493	coding	--
chr15	22940657	22941061	--	--
chr14	76876628	76877794	3' UTR	Yes
chr6	28730931	28730973	--	--
chrX	139690100	139690623	3' UTR	Yes
chr12	111241429	111241924	coding	Yes
chr6	139905604	139905640	lincRNA	--
chr13	84311334	84311373	--	--
chr5	20276361	20276854	--	--
chr3	115539647	115540089	lincRNA	Yes
chr3	25680799	25681382	coding	Yes
chr8	10377793	10378667	--	Yes
chr9	136252702	136252744	--	--
chr16	47883209	47883883	lincRNA	--
chr15	22905789	22906145	lincRNA	Yes
chr13	85867398	85867436	--	--
chr14	52577305	52577808	3' UTR	Yes
chr11	72791850	72792672	EvoFold	Yes
chrY	10647613	10647845	--	Yes
chr9	110935047	110935592	3' UTR	Yes
chr1	65297516	65297831	lincRNA	--
chr7	117626986	117627488	--	Yes
chr15	22810079	22810762	lincRNA	Yes
chr16	33872366	33872420	--	--
chr3	21856430	21857032	--	--
chr8	38249306	38249712	3' UTR	Yes
chr17	17030776	17033167	3' UTR	Yes
chr8	10340214	10341241	--	Yes
chr3	22058966	22059493	--	--
chr3	115530435	115531130	coding	--
chrX	124120473	124121136	--	--
chr8	10371940	10372487	--	Yes
chr8	10764368	10764793	EvoFold	--
chr5	20576027	20576535	lincRNA	--
chr3	117006010	117007638	EvoFold	Yes
chr6	28300309	28300359	--	--
chr5	20493453	20493972	--	--
chr5	20575053	20575475	lincRNA	--
chr5	63837686	63838118	coding	Yes
chr15	22884247	22884942	lincRNA	--
chr16	79192639	79193193	EvoFold	Yes
chr14	70260264	70260933	--	Yes
chr6	136704273	136704880	3' UTR	Yes
chr3	97818718	97819728	--	Yes
chr6	127306244	127306416	--	Yes
chr17	2571919	2572621	--	Yes
chr5	82387222	82387696	3' UTR	Yes
chr3	26728589	26729001	EvoFold	Yes
chr3	117004211	117005823	EvoFold	Yes
chr16	33873811	33873863	--	--
chr8	10328386	10328940	3' UTR	Yes
chr8	32990774	32990927	lincRNA	--
chr8	10762743	10763812	EvoFold	--
chr12	52965732	52966308	EvoFold	Yes
chr16	79193576	79194224	EvoFold	Yes
chr3	115526134	115527234	lincRNA	--
chr17	53426506	53427201	lincRNA	Yes
chr18	42508367	42509013	3' UTR	Yes
chr16	47900191	47900793	lincRNA	--
chr17	21946601	21947161	--	--
chr18	12989430	12989583	5' UTR	Yes
chr3	22120660	22121472	--	--
chr15	22796433	22796613	lincRNA	Yes
chr5	20584356	20585001	lincRNA	--
chr9	72338212	72339125	lincRNA	Yes
chr5	20574314	20574764	lincRNA	--
chr7	65200442	65200491	--	--
chr5	20607450	20609634	lincRNA	--
chr9	110935857	110936291	3' UTR	Yes
chr15	61672551	61673075	3' UTR	Yes
chr11	27867052	27867541	coding	--
chr1	196120587	196120734	--	--
chr14	76875399	76876118	3' UTR	Yes
chrX	73374650	73376517	lincRNA	Yes
chr11	123001676	123003713	--	Yes
chr7	65975916	65975961	lincRNA	--
chr17	17033690	17035933	3' UTR	Yes
chr8	10341738	10342950	--	--
chr3	149651182	149651226	--	--
chr13	41704144	41704931	lincRNA	Yes
chr15	22956713	22957352	--	--
chr15	43245164	43245520	3' UTR	Yes
chr15	76939832	76939868	--	--
chr3	177531466	177531512	lincRNA	--
chr5	150853544	150854006	3' UTR	Yes
chr4	43462222	43463472	--	--
chr2	70737798	70739458	3' UTR	Yes
chr12	112066490	112066537	--	--
chr19	63311633	63312203	--	Yes
chr8	32988588	32988815	lincRNA	--
chr12	50489846	50491020	--	Yes
chr11	47445238	47445568	EvoFold	Yes
chr3	162272781	162273614	--	Yes
chr1	200365264	200366087	coding	Yes
chr3	115529116	115529876	lincRNA	--
chr3	22171786	22172582	--	--
chr4	79148737	79148866	--	--
chr2	95560246	95560962	--	Yes
chr2	156090938	156091127	EvoFold	--
chr20	20295476	20296126	coding	--
chr1	196120185	196120447	--	--
chr3	157140140	157140985	3' UTR	--
chr4	146516470	146516826	coding	Yes
chr3	22162308	22162887	--	--
chr2	150263158	150263198	--	--
chr7	142054901	142054962	--	--
chr10	46422384	46422846	3' UTR	Yes
chr4	90377956	90378582	--	Yes
chr7	2874939	2874978	--	--
chr12	122342498	122343073	3' UTR	Yes
chr17	19445436	19445628	--	--
chr12	55199876	55199912	--	--
chr14	20746412	20747123	3' UTR	Yes
chr3	22173921	22174781	--	--
chr12	107047193	107047637	coding	Yes
chr16	47928515	47928743	lincRNA	Yes
chr5	36911413	36912474	EvoFold	Yes
chr2	95561170	95561718	--	Yes
chr16	47876538	47877923	lincRNA	Yes
chr13	64939635	64939985	lincRNA	--
chr8	10376184	10376612	--	Yes
chr3	22006747	22007386	--	--
chr14	99050219	99051229	3' UTR	Yes
chr3	21925221	21925774	--	--
chr2	156110837	156111319	EvoFold	--
chr20	46912725	46912760	--	--
chr3	22170351	22171141	--	--
chr3	22372594	22373765	lincRNA	--
chr11	102435503	102436265	coding	--
chr15	22818400	22819035	lincRNA	Yes
chr17	45013377	45014973	3' UTR	Yes
chr3	23996655	23997085	3' UTR	Yes
chr5	20530804	20531281	--	--
chr7	142053835	142054035	--	--
chr5	140628490	140628536	--	--
chr4	72271419	72271853	coding	--
chr4	142004873	142005392	lincRNA	Yes
chr11	107882970	107883811	3' UTR	Yes
chr3	22166542	22167429	--	--
chr11	82369692	82370117	3' UTR	Yes
chr2	95884978	95885487	coding	--
chr5	20541010	20541915	--	--
chr12	97521480	97521696	3' UTR	Yes
chr15	22961928	22962295	--	--
chr9	19498093	19498500	EvoFold	Yes
chr5	62029942	62029983	--	--
chr4	93230304	93230356	--	--
chr13	99430350	99430733	5' UTR	--
chr3	22013026	22013451	--	--
chr15	22793555	22794818	lincRNA	Yes
chr13	41708109	41708646	lincRNA	--
chr2	156099885	156100315	EvoFold	--
chr2	230337923	230338882	EvoFold	Yes
chr11	94539709	94540169	EvoFold	Yes
chr8	10789425	10789866	3' UTR	--
chr8	102252920	102254300	lincRNA	Yes
chr3	21918148	21918537	--	--
chr3	22184860	22185517	coding	--
chr7	78928803	78929290	lincRNA	--
chr2	216791361	216791992	coding	Yes
chr3	22036192	22036960	--	--
chr14	80713626	80715161	EvoFold	Yes
chr17	75527772	75528273	3' UTR	Yes
chr11	64966937	64967845	lincRNA	--
chr1	231815737	231816310	5' UTR	Yes
chr4	87154569	87155112	3' UTR	Yes
chr11	120575724	120575772	--	--
chr3	115517173	115518003	lincRNA	Yes
chr13	30607479	30607916	EvoFold	Yes
chr9	72333994	72334488	lincRNA	Yes
chr4	61792965	61793999	EvoFold	--
chr8	38248572	38248908	3' UTR	Yes
chr19	7842891	7843408	coding	Yes
chr3	22175493	22176212	--	--
chr5	82386823	82387048	3' UTR	Yes
chr3	22074984	22075435	--	--
chrX	55224688	55224880	--	--
chr12	29383835	29384260	--	Yes
chr2	85422101	85422258	coding	Yes
chr6	117023783	117024250	--	Yes
chr16	47923162	47923589	lincRNA	Yes
chr3	198819134	198819623	--	Yes
chr5	86723553	86724798	EvoFold	Yes
chr3	22088229	22088616	--	--
chr9	19266171	19266470	coding	Yes
chr3	21858755	21860593	--	--
chr7	49926134	49926563	3' UTR	Yes
chr12	111304081	111304352	coding	Yes
chr15	22829138	22831127	lincRNA	Yes
chrX	73370809	73371829	lincRNA	Yes
chr17	75521925	75522834	3' UTR	Yes
chr12	107702180	107702567	EvoFold	Yes
chr8	140692902	140693459	3' UTR	Yes
chr3	22083095	22084010	--	--
chr4	61832353	61832876	--	--
chr7	129560833	129561222	3' UTR	Yes
chr8	75678254	75678931	--	Yes
chr11	94544413	94545276	EvoFold	Yes
chr2	194060998	194061041	--	--
chr5	20465394	20466007	--	--
chr3	115521925	115522796	lincRNA	--
chr5	20599496	20600127	lincRNA	--
chr18	42510408	42510824	3' UTR	Yes
chr3	85090928	85091421	coding	Yes
chrX	55225017	55225307	--	Yes
chr2	223134648	223135258	--	Yes
chr3	21975271	21976296	--	--
chr11	44675336	44675375	--	--
chr3	162275099	162275544	coding	Yes
chr16	47921723	47922174	lincRNA	Yes
chr3	185430560	185431007	5' UTR	Yes
chr3	198818321	198818900	coding	Yes
chr1	53483216	53483634	3' UTR	--
chr18	54217180	54217713	3' UTR	Yes
chr3	86201376	86201950	EvoFold	Yes
chrX	73376633	73377314	lincRNA	Yes
chr2	70740073	70741073	3' UTR	Yes
chr5	20469185	20469796	--	--
chrX	73356114	73356659	lincRNA	--
chr8	140693659	140693972	3' UTR	Yes
chr2	165957694	165958156	3' UTR	--
chr19	3417348	3418070	3' UTR	Yes
chr4	61773979	61774509	--	--
chr3	21925972	21926209	--	--
chr3	21922322	21923651	--	--
chr2	156108358	156109087	EvoFold	--
chr12	79712175	79713144	3' UTR	Yes
chr5	80270962	80271009	--	--
chr15	22819569	22819768	lincRNA	--
chr5	20538283	20539218	--	--
chr5	20523676	20524520	--	--
chr3	115531622	115533478	lincRNA	--
chr7	154886555	154887065	lincRNA	Yes
chr2	120456546	120457647	EvoFold	Yes
chr15	22959165	22959683	--	--
chr17	53114927	53115411	EvoFold	Yes
chr5	20525382	20525806	--	--
chr5	20610961	20611523	lincRNA	Yes
chr18	8695618	8695821	coding	--
chr8	131606640	131606677	--	--
chr3	98015103	98015842	coding	--
chr7	154884501	154885264	lincRNA	Yes
chr3	22309312	22309686	lincRNA	--
chr19	3072528	3073994	3' UTR	Yes
chr15	43245923	43246569	3' UTR	--
chr1	17706610	17706655	--	--
chr8	77276753	77276904	--	--
chr3	22160162	22160649	--	--
chr3	21934208	21935673	--	--
chr5	20594758	20595350	lincRNA	--
chr7	140071076	140071594	lincRNA	Yes
chr11	72794322	72794665	EvoFold	Yes
chr3	22115888	22116356	--	--
chr17	21944824	21944888	--	--
chr22	40634871	40636107	coding	--
chr5	81121854	81121903	--	--
chr8	11556971	11557017	--	--
chr1	22295024	22295060	lincRNA	--
chrX	124164318	124165173	--	--
chr9	19499123	19499831	EvoFold	Yes
chr3	22081658	22082944	--	--
chr17	76980653	76982138	coding	Yes
chr17	53113755	53114575	EvoFold	Yes
chr15	91227083	91227428	coding	Yes
chr3	22377104	22378185	lincRNA	--
chr16	47881402	47883068	lincRNA	Yes
chr9	15161039	15161550	3' UTR	Yes
chr7	142054421	142054757	--	--
chr4	103935754	103936169	EvoFold	Yes
chr16	47889998	47890351	lincRNA	Yes
chr6	34363274	34363965	EvoFold	Yes
chr5	20582664	20583137	lincRNA	--
chr2	156092780	156093210	EvoFold	--
chr16	31376822	31377668	coding	Yes
chr12	17028142	17028185	--	--
chr9	15155866	15156878	3' UTR	Yes
chr22	48980399	48980938	3' UTR	Yes
chr3	21971773	21972362	--	--
chr7	26194499	26195152	3' UTR	--
chr11	74653613	74653996	3' UTR	Yes
chr6	34094608	34095183	EvoFold	Yes
chr4	177487621	177488814	3' UTR	Yes
chr1	240184110	240184148	--	--
chr3	22062312	22063307	--	--
chr4	55889075	55889209	--	--
chr2	236702191	236702694	--	Yes
chr4	12251056	12251319	coding	--
chr13	41711080	41712024	lincRNA	Yes
chr5	20521113	20522204	--	--
chr13	41707340	41707877	lincRNA	--
chr3	162273773	162274048	--	Yes
chr3	26732126	26732516	EvoFold	Yes
chr16	70597591	70597812	coding	--
chr8	57146348	57146860	--	Yes
chr16	47893626	47893958	lincRNA	--
chr17	33809699	33810672	EvoFold	Yes
chr3	21908705	21909109	--	--
chr16	3361916	3362076	--	--
chr2	156106999	156108088	EvoFold	--
chr16	31725052	31725356	coding	Yes
chr7	140067463	140070156	coding	Yes
chr1	117711045	117711562	coding	Yes
chr17	46187179	46187981	--	Yes
chr18	5266606	5266648	--	--
chr5	20470345	20471179	--	--
chr16	83754495	83755085	coding	--
chr2	156112124	156113050	coding	--
chr16	33871993	33872036	--	--
chr11	110531410	110531451	--	--
chr3	115518117	115519580	lincRNA	Yes
chr18	54218076	54218991	3' UTR	Yes
chr20	46570976	46571016	--	--
chr12	122340534	122341213	3' UTR	Yes
chr6	137597539	137597580	--	--
chr15	22815183	22815390	lincRNA	--
chr13	78785099	78785972	lincRNA	--
chr16	47904810	47905409	lincRNA	--
chr3	21974067	21974609	--	--
chr3	22134618	22135462	--	--
chr1	24738472	24739636	3' UTR	Yes
chr1	200366236	200367066	coding	Yes
chr19	20029713	20029754	--	--
chr5	76120328	76120371	--	--
chr17	24895661	24896321	EvoFold	Yes
chr15	56938445	56939724	3' UTR	Yes
chr3	22090227	22090939	--	--
chr5	20594374	20594604	lincRNA	--
chr5	63943958	63944370	3' UTR	--
chr5	19508352	19508723	3' UTR	Yes
chr13	41706354	41707210	lincRNA	--
chrY	10643493	10643566	--	--
chr1	182558434	182558475	--	--
chr5	36135210	36136049	3' UTR	Yes
chr3	22114130	22115154	--	--
chr7	45257992	45258227	--	Yes
chr7	154885508	154885951	lincRNA	Yes
chr5	20524654	20525120	--	--
chr3	58385923	58386424	EvoFold	Yes
chrX	139691803	139692185	3' UTR	Yes
chr4	134856392	134856428	--	--
chr5	18061321	18061372	--	--
chr11	89569779	89570678	--	Yes
chr9	24804346	24804389	--	--
chr2	120453732	120454922	coding	Yes
chr1	5832898	5833091	--	--
chr5	123124860	123125089	--	--
chr20	34101665	34102325	lincRNA	Yes
chr2	126286269	126286311	--	--
chr9	19505482	19505818	EvoFold	--
chr15	39377618	39378026	lincRNA	Yes
chr16	33873079	33873596	--	--
chr19	23807167	23807809	--	--
chr18	42504734	42505423	3' UTR	Yes
chr18	54216401	54217027	3' UTR	Yes
chr3	22093826	22094438	--	--
chr3	174596900	174597184	--	Yes
chr15	22955729	22956577	--	--
chr3	162271924	162272550	coding	Yes
chr19	20519778	20520624	coding	Yes
chr10	27869402	27869812	3' UTR	--
chr8	10787907	10788352	3' UTR	--
chr12	50488593	50489649	coding	Yes
chr9	5259158	5259194	--	--
chr18	4433896	4434538	lincRNA	Yes
chr13	108874466	108874706	--	Yes
chr15	22836173	22836553	lincRNA	--
chr16	61993154	61993194	--	--
chr9	110934372	110934746	3' UTR	Yes
chr3	22172896	22173580	--	--
chr4	27341148	27341296	--	--
chr7	140071769	140072701	lincRNA	Yes
chr19	47067682	47068267	--	Yes
chr2	120457771	120458114	EvoFold	Yes
chr8	81710528	81710954	3' UTR	Yes
chr17	75271690	75271796	--	--
chr11	96944638	96944688	--	--
chr7	44067872	44068773	3' UTR	Yes
chr14	76658518	76659220	coding	--
chr3	21868367	21869129	--	--
chr3	115520401	115520643	lincRNA	Yes
chr14	23964803	23965173	3' UTR	Yes
chr14	54326176	54326723	EvoFold	Yes
chr5	20560995	20561644	lincRNA	--
chr14	76653447	76653871	lincRNA	--
chr5	67557874	67558120	5' UTR	Yes
chr4	22736206	22736258	--	--
chr5	179273669	179274228	lincRNA	Yes
chr10	76607882	76608336	3' UTR	Yes
chr5	10489180	10489568	coding	Yes
chr5	20573720	20574122	lincRNA	--
chr6	34093463	34094138	EvoFold	Yes
chr1	168542818	168542860	--	--
chr3	86202784	86205497	EvoFold	Yes
chr2	104254606	104254644	--	--
chr7	140065945	140066793	lincRNA	Yes
chr4	90380727	90381529	--	Yes
chr5	28087138	28087194	--	--
chr4	90381698	90384414	coding	Yes
chr2	132732033	132732230	--	--
chr8	47861396	47861453	--	--
chr3	21979399	21980747	--	--
chr2	156090399	156090807	EvoFold	--
chr3	22030617	22031391	--	--
chr17	53521826	53523048	coding	Yes
chr7	72751358	72751398	EvoFold	--
chr4	156606364	156606421	--	--
chr17	76978270	76979070	lincRNA	Yes
chr12	32422422	32422999	3' UTR	Yes
chr3	22117742	22118164	--	--
chr15	22836878	22837091	lincRNA	--
chr16	31626478	31626942	--	Yes
chr11	94542011	94542592	EvoFold	Yes
chr5	139463080	139463118	--	--
chr19	57579932	57580382	coding	Yes
chr8	10358185	10359307	--	--
chr17	24902171	24902503	EvoFold	Yes
chr10	73684126	73684164	lincRNA	--
chr5	20066862	20067381	--	--
chr1	65300231	65300781	lincRNA	--
chr3	26727331	26727710	EvoFold	--
chr2	132731591	132731802	--	Yes
chr3	22095925	22096982	--	--
chr3	21905190	21905954	--	--
chr19	3418868	3419538	3' UTR	Yes
chr3	21900064	21900591	--	--
chr3	22087417	22088096	--	--
chr16	47884272	47886048	lincRNA	--
chr6	101948324	101948432	5' UTR	Yes
chr8	122751882	122751921	--	--
chr9	19504591	19505269	coding	--
chr15	22795091	22795397	lincRNA	Yes
chr3	115519701	115520253	coding	Yes
chr5	82385060	82385524	3' UTR	Yes
chr12	112218364	112219172	5' UTR	Yes
chr15	22791570	22793224	lincRNA	Yes
chr15	22831334	22832058	lincRNA	Yes
chr1	54463805	54464703	EvoFold	Yes
chr17	11402949	11403684	3' UTR	--
chr17	43325758	43325798	--	--
chr12	113502517	113502560	--	--
chr8	28972912	28973414	lincRNA	--
chr2	120452583	120453610	EvoFold	Yes
chr19	20519352	20519660	--	--
chr3	21920878	21921243	--	--
chr8	49137777	49138383	--	Yes
chr14	20744810	20746253	3' UTR	Yes
chr13	41713431	41713900	lincRNA	Yes
chr3	21954615	21955306	--	--
chr1	217484866	217484907	--	--
chr14	76656976	76657817	lincRNA	Yes
chr6	34097066	34097510	EvoFold	Yes
chrX	46185041	46185098	--	Yes
chr15	91241954	91242299	lincRNA	Yes
chr2	236701298	236702039	--	Yes
chr7	153192915	153193145	--	--
chr12	96478754	96478950	EvoFold	--
chr11	11937491	11938950	3' UTR	Yes
chr15	22881893	22882707	lincRNA	--
chr15	39384991	39385874	lincRNA	Yes
chr7	153154047	153154440	--	--
chr2	187337507	187337935	3' UTR	Yes
chr15	22963155	22963573	--	Yes
chr3	21914677	21914953	--	Yes
chr3	193341982	193342363	3' UTR	Yes
chr6	62342015	62342512	--	Yes
chr18	4441324	4441909	lincRNA	--
chr4	186306989	186307626	3' UTR	Yes
chr17	33920920	33921473	--	Yes
chr11	74651521	74652064	3' UTR	Yes
chr1	141734451	141734496	lincRNA	--
chr15	22820650	22823031	lincRNA	Yes
chr5	20489886	20490415	--	--
chr19	63071133	63071616	--	Yes
chr2	120452011	120452406	EvoFold	Yes
chr19	63074210	63074746	--	Yes
chr11	10487416	10487933	--	Yes
chr9	72337422	72337873	lincRNA	Yes
chr9	110936671	110937529	3' UTR	Yes
chr1	110476462	110476506	--	--
chr17	52300351	52300887	--	Yes
chr1	206041952	206042400	lincRNA	Yes
chr19	47468200	47469040	coding	--
chr6	122805735	122806172	3' UTR	--
chr6	90125828	90126422	3' UTR	Yes
chr5	20536448	20536951	--	--
chr15	39380725	39381697	lincRNA	Yes
chr3	162276610	162277256	--	Yes
chr3	148231533	148232079	--	--
chr2	140696068	140696229	--	--
chr9	19500723	19501099	EvoFold	Yes
chr17	75525646	75527073	3' UTR	Yes
chr16	87794515	87794927	coding	--
chr10	46422991	46423631	3' UTR	Yes
chr15	22905237	22905591	lincRNA	Yes
chr8	9799476	9801594	lincRNA	Yes
chr3	21844031	21844532	--	--
chr8	10370661	10371092	--	Yes
chr7	150414424	150414674	5' UTR	Yes
chr9	67909463	67910634	--	Yes
chr3	22104625	22105776	--	--
chr17	59925046	59925865	coding	Yes
chr4	105834610	105834901	--	--
chrX	142540979	142541788	3' UTR	Yes
chr15	22812471	22813144	lincRNA	--
chr15	40821590	40822216	coding	Yes
chr3	70256965	70258227	coding	Yes
chr4	177486550	177487338	3' UTR	Yes
chr3	22157259	22157911	--	--
chr17	76979189	76980531	lincRNA	Yes
chr8	69308660	69309158	3' UTR	Yes
chr6	13895608	13896033	--	Yes
chr5	10489707	10491116	--	Yes
chr14	80715450	80716145	EvoFold	Yes
chr6	123431135	123431632	3' UTR	Yes
chr2	152397996	152398537	3' UTR	Yes
chr3	21972912	21973404	--	--
chr7	129561372	129562053	coding	Yes
chr15	56940152	56940769	3' UTR	Yes
chr2	156093576	156093974	EvoFold	--
chr8	10761643	10761979	EvoFold	--
chr5	20585655	20586136	lincRNA	--
chr17	44535056	44535092	--	--
chr3	21911019	21911735	--	--
chr4	43461164	43461886	--	--
chr3	21885118	21885786	--	--
chr9	72335129	72335634	lincRNA	Yes
