# Supplementary material for: Intergenic and Repeat Transcription in Human, Chimpanzee and Macaque Brains Measured by RNA-Seq
Source: PLoS Comput Biol. 2010 Jul 1;6(7):e1000843. doi: 10.1371/journal.pcbi.1000843 (PMC2895644; doi:10.1371/journal.pcbi.1000843)
Supplement: Table S4 — GO term(biological process) enrichment analysis results (0.02 MB XLS) [file pcbi.1000843.s022.xls]

## Sheet: Sheet1
Table S4. GO term(biological process) enrichment analysis results.
A. Human specific genes.
GO term	categ+/test+*	categ+/test-	categ-/test+	categ-/test-	raw p-value**	global p-value***
cotranslational protein targeting to membrane	3	13	91	11076	0.000297528	0.15
translational elongation	4	85	90	11004	0.00663274	0.15
positive regulation of transport	3	82	91	11007	0.0346385	0.15
regulation of transcription, DNA-dependent	24	1961	70	9128	0.0366542	0.15
regulation of transport	8	200	86	10889	0.0469454	0.15
B. Genes with igHTR 10kb nearby.
GO term	categ+/test+*	categ+/test-	categ-/test+	categ-/test-	raw p-value**	global p-value***
glutamate signaling pathway	5	13	178	10987	8.00797e-06	0.003
regulation of excitatory postsynaptic membrane potential	4	9	179	10991	4.42061e-05	0.003
L-amino acid transport	3	8	180	10992	0.000645698	0.003
calcium ion transport	8	113	175	10887	0.000823177	0.003
regulation of action potential	5	43	178	10957	0.00107582	0.003
phosphoinositide phosphorylation	3	11	180	10989	0.00137381	0.003
regulation of synaptic plasticity	4	31	179	10969	0.00244436	0.003
DNA topological change	3	17	180	10983	0.00400313	0.003
regulation of protein catabolic process	3	18	180	10982	0.00461466	0.003
protein ubiquitination	6	100	177	10900	0.007824	0.003
sodium ion transport	6	106	177	10894	0.0101306	0.003
learning	3	27	180	10973	0.0126514	0.003
cell surface receptor linked signal transduction	39	1306	144	9694	0.0171399	0.003
establishment or maintenance of chromatin architecture	11	316	172	10684	0.0186486	0.003
regulation of Rab GTPase activity	3	32	180	10968	0.0192194	0.003
negative regulation of cell communication	6	129	177	10871	0.0234561	0.003
regulation of neurotransmitter levels	6	53	177	10947	0.0255966	0.003
regulation of MAPKKK cascade	3	36	180	10964	0.0255966	0.003
cytokine-mediated signaling pathway	3	38	180	10962	0.0291605	0.003
MAPKKK cascade	8	139	175	10861	0.0320799	0.003
regulation of neuron apoptosis	3	42	180	10958	0.0370322	0.003
regulation of neurogenesis	4	76	179	10924	0.0419965	0.003
C. Genes with 3' igHTR 10 kb nearby.
GO term	categ+/test+*	categ+/test-	categ-/test+	categ-/test-	raw p-value**	global p-value***
L-amino acid transport	3	8	147	11025	0.000360666	0.032
calcium ion transport	7	114	143	10919	0.00119791	0.032
protein ubiquitination	6	100	144	10933	0.00299006	0.032
cell surface receptor linked signal transduction	32	1313	118	9720	0.0118074	0.032
regulation of neurotransmitter levels	6	53	144	10980	0.0151916	0.032
regulation of MAPKKK cascade	3	36	147	10997	0.0151916	0.032
sodium ion transport	5	107	145	10926	0.0173172	0.032
cytokine-mediated signaling pathway	3	38	147	10995	0.01738	0.032
regulation of neurogenesis	4	76	146	10957	0.0224097	0.032
regulation of action potential	3	45	147	10988	0.0263566	0.032
negative regulation of signal transduction	5	120	145	10913	0.0264053	0.032
positive regulation of transport	4	81	146	10952	0.027268	0.032
neurotransmitter transport	6	65	144	10968	0.0308314	0.032
second-messenger-mediated signaling	6	173	144	10860	0.0334367	0.032
activation of MAPK activity	3	51	147	10982	0.0356796	0.032
JNK cascade	3	57	147	10976	0.0464771	0.032
* "categ" means the GO biological process term, "test" means whether within tested genes list, + and - indicate "yes" and "no".
** category enrichment p-value(see Methods for details)
*** overall enrichment p-value(see Methods for details)
