# Supplementary material for: Intergenic and Repeat Transcription in Human, Chimpanzee and Macaque Brains Measured by RNA-Seq
Source: PLoS Comput Biol. 2010 Jul 1;6(7):e1000843. doi: 10.1371/journal.pcbi.1000843 (PMC2895644; doi:10.1371/journal.pcbi.1000843)
Supplement: Table S5 — KEGG pathway enrichment analysis results (0.03 MB XLS) [file pcbi.1000843.s023.xls]

## Sheet: Sheet1
Table S5. KEGG pathway enrichment analysis results.
A. Human specific genes.
KEGG pathway	categ+/test+*	categ+/test-	categ-/test+	categ-/test-	raw p-value**	global p-value***
Neurotrophin signaling pathway	4	100	26	3376	0.0110604	0.602
Ribosome	3	64	27	3412	0.0187394	0.602
Chemokine signaling pathway	4	131	26	3345	0.0264874	0.602
B. Genes with igHTR 10kb nearby.
KEGG pathway	categ+/test+*	categ+/test-	categ-/test+	categ-/test-	raw p-value**	global p-value***
MAPK signaling pathway	12	196	48	3250	0.000153851	0.001
Melanoma	6	54	54	3392	0.000475938	0.001
Endometrial cancer	5	44	55	3402	0.00132747	0.001
ErbB signaling pathway	6	68	54	3378	0.00146265	0.001
Acute myeloid leukemia	5	47	55	3399	0.00173964	0.001
Neurotrophin signaling pathway	7	97	53	3349	0.00174923	0.001
Regulation of actin cytoskeleton	9	157	51	3289	0.001769	0.001
Colorectal cancer	6	72	54	3374	0.00192327	0.001
Type II diabetes mellitus	4	29	56	3417	0.00218935	0.001
Prostate cancer	6	75	54	3371	0.00233543	0.001
Insulin signaling pathway	7	106	53	3340	0.00282016	0.001
Pancreatic cancer	5	62	55	3384	0.0053149	0.001
mTOR signaling pathway	4	43	56	3403	0.00798648	0.001
Non-small cell lung cancer	4	45	56	3401	0.00924942	0.001
Glioma	4	53	56	3393	0.015584	0.001
Fc epsilon RI signaling pathway	4	54	56	3392	0.0165283	0.001
Long-term potentiation	4	57	56	3389	0.0195748	0.001
B cell receptor signaling pathway	4	58	56	3388	0.0206626	0.001
Pathways in cancer	10	277	50	3169	0.0220518	0.001
Renal cell carcinoma	4	60	56	3386	0.0229488	0.001
Chemokine signaling pathway	6	129	54	3317	0.0265064	0.001
Chronic myeloid leukemia	4	64	56	3382	0.0279706	0.001
Jak-STAT signaling pathway	5	96	55	3350	0.0280411	0.001
Small cell lung cancer	4	71	56	3375	0.0382345	0.001
Toll-like receptor signaling pathway	4	75	56	3371	0.0449561	0.001
T cell receptor signaling pathway	4	76	56	3370	0.0467342	0.001
Ubiquitin mediated proteolysis	5	111	55	3335	0.0468007	0.001
C. Genes with 3' igHTR 10 kb nearby.
KEGG pathway	categ+/test+*	categ+/test-	categ-/test+	categ-/test-	raw p-value**	global p-value***
MAPK signaling pathway	12	196	32	3266	5.4073e-06	0
Melanoma	5	55	39	3407	0.000807152	0
Neurotrophin signaling pathway	6	98	38	3364	0.00166534	0
ErbB signaling pathway	5	69	39	3393	0.00209008	0
Insulin signaling pathway	6	107	38	3355	0.00254855	0
Colorectal cancer	5	73	39	3389	0.00263917	0
Endometrial cancer	4	45	40	3417	0.00303235	0
Prostate cancer	5	76	39	3386	0.003115	0
Regulation of actin cytoskeleton	7	159	37	3303	0.00408438	0
Type II diabetes mellitus	3	30	41	3432	0.00773999	0
Pancreatic cancer	4	63	40	3399	0.00931372	0
mTOR signaling pathway	3	44	41	3418	0.020368	0
Non-small cell lung cancer	3	46	41	3416	0.0227455	0
Pathways in cancer	8	279	36	3183	0.0241037	0
Chemokine signaling pathway	5	130	39	3332	0.0255595	0
Acute myeloid leukemia	3	49	41	3413	0.0265849	0
Glioma	3	54	41	3408	0.0337109	0
Fc epsilon RI signaling pathway	3	55	41	3407	0.0352445	0
Jak-STAT signaling pathway	4	97	40	3365	0.036488	0
Long-term depression	3	56	41	3406	0.036814	0
B cell receptor signaling pathway	3	59	41	3403	0.0417364	0
Renal cell carcinoma	3	61	41	3401	0.0451945	0
* "categ" means the KEGG term, "test" means whether within tested genes list, + and - indicate "yes" and "no".
** category enrichment p-value(see Methods for details)
*** overall enrichment p-value(see Methods for details)
