# Supplementary material for: Intergenic and Repeat Transcription in Human, Chimpanzee and Macaque Brains Measured by RNA-Seq
Source: PLoS Comput Biol. 2010 Jul 1;6(7):e1000843. doi: 10.1371/journal.pcbi.1000843 (PMC2895644; doi:10.1371/journal.pcbi.1000843)
Supplement: Table S7 — Evolutionary conservation of human specific genes (0.02 MB XLS) [file pcbi.1000843.s025.xls]

## Sheet: human specfic genes
Table S7. Evolutionary conservation of human specific genes.
Measures*	Number of Genes (Test)	Number of Genes (Control)	mean value of Test genes	mean value of Control genes	median value of Test genes	median value of Control genes	Wilcoxon test p-value
Kp of promoter regions between humans and chimpanzees	61	7005	0.00970492	0.0106734	0.0098	0.01	0.3
Ka/Ki ratio between humans and chimpanzees	77	10242	0.180664	0.210229	0.0879765	0.133219	0.088
Ka/Ks ratio between humans and mice	86	12265	0.132145	0.140909	0.098068	0.107715	0.41
* see Methods for details and the corresponding references.
