# Supplementary material for: Intergenic and Repeat Transcription in Human, Chimpanzee and Macaque Brains Measured by RNA-Seq
Source: PLoS Comput Biol. 2010 Jul 1;6(7):e1000843. doi: 10.1371/journal.pcbi.1000843 (PMC2895644; doi:10.1371/journal.pcbi.1000843)
Supplement: Table S10 — Species-specific GW (1.54 MB XLS) [file pcbi.1000843.s028.xls]

## Sheet: GW
Table S10. Species-specific GW.
A. Human Specific GW (440 identified in both G1 and G2, 518 only in G1, 463 only in G2).
ID	Human coordintes	Chimp coordinates	Macaque coordinates	Human1 expression*	Human2 expression*	Chimp expression*	Macaque expression*	identified in**
1	chr2.180816341-181004446	chr2b.185311130-185508628	chr12.43862908-44037074	63	31	1	1	G1,G2
2	chr2.180913829-181139115	chr2b.185416207-185642062	chr12.43951087-44154680	63	31	1	1	G1,G2
3	chr5.22777303-22839750	chr5.93243666-93181480	chr6.22832923-22892211	57	39	0	2	G1,G2
4	chr8.135309706-135397378	chr8.133924409-134011097	chr8.136792906-136876537	62	34	0	1	G1,G2
5	chr8.135360624-135478707	chr8.133974550-134093952	chr8.136843768-136956705	62	33	1	1	G1,G2
6	chr5.22806664-22875663	chr5.93214255-93145716	chr6.22862258-22926794	54	39	0	3	G1,G2
7	chr1.185558419-185691868	chr1.167069045-167197910	chr1.183400628-183274476	51	43	0	2	G1,G2
8	chr1.185510112-185617432	chr1.167018260-167123090	chr1.183454336-183351770	55	40	0	1	G1,G2
9	chr8.135266097-135352099	chr8.133880027-133968416	chr8.136748433-136835738	55	35	0	4	G1,G2
10	chr5.22746807-22800459	chr5.93274171-93220511	chr6.22802169-22857000	48	48	0	1	G1,G2
11	chr16.69548211-69651911	chr16.70798881-70908078	chr20.71687607-71581639	59	35	1	1	G1,G2
12	chr2.181018515-181314201	chr2b.185522977-185824116	chr12.44051255-44323331	60	32	1	2	G1,G2
13	chr16.69653095-69706897	chr16.70909256-70962765	chr20.71580527-71526152	59	32	2	2	G1,G2
14	chr1.143709811-143732472	chr1.114333854-114310775	chr1.123198308-123169597	52	33	1	6	G1,G2
15	chr8.2572402-2657658	chr8.2645094-2736115	chr8.2686175-2757021	52	41	1	2	G1,G2
16	chr5.22236306-22438235	chr5.93792947-93586103	chr6.22267009-22477022	52	42	0	2	G1,G2
17	chr1.185624034-185745805	chr1.167129686-167253740	chr1.183344503-183219377	46	50	0	2	G1,G2
18	chr5.22715784-22773439	chr5.93306212-93247553	chr6.22772047-22829082	45	54	0	0	G1,G2
19	chr8.2697983-2753696	chr8.2776403-2833283	chr8.2792786-2915146	56	40	1	0	G1,G2
20	chr16.21155191-21187680	chr16.21327798-21358673	chr20.20101972-20144443	51	45	0	1	G1,G2
21	chr5.22651218-22743931	chr5.93371505-93277057	chr6.22699317-22799260	44	50	0	2	G1,G2
22	chr8.2667799-2719910	chr8.2746229-2798079	chr8.2767289-2832858	55	41	1	0	G1,G2
23	chr5.22353336-22536509	chr5.93672888-93485600	chr6.22395161-22579382	49	46	1	1	G1,G2
24	chr1.69435401-69947228	chr1.70412792-70935360	chr1.71960197-72472225	62	20	4	4	G1,G2
25	chr16.21180900-21198324	chr16.21351607-21369297	chr20.20137378-20155021	42	56	0	0	G1,G2
26	chr16.69671305-69754055	chr16.70927496-71009836	chr20.71561516-71483020	53	34	2	4	G1,G2
27	chr1.185699926-185876947	chr1.167205956-167382699	chr1.183266626-183098916	48	47	1	1	G1,G2
28	chr16.69604977-69669570	chr16.70860723-70925765	chr20.71632580-71563957	56	37	3	0	G1,G2
29	chr16.21120300-21152417	chr16.21288142-21325024	chr20.20064060-20099185	46	51	0	0	G1,G2
30	chr5.22561949-22712798	chr5.93460144-93309241	chr6.22606635-22769038	46	45	1	3	G1,G2
31	chr1.185400316-185553284	chr1.166909461-167063931	chr1.183561630-183405833	44	48	1	2	G1,G2
32	chr5.22453350-22647414	chr5.93571333-93375354	chr6.22492245-22695226	49	45	1	1	G1,G2
33	chr1.185180257-185500808	chr1.166698366-167008946	chr1.183778525-183464891	44	50	0	2	G1,G2
34	chr2.181170273-181466112	chr2b.185672005-185974161	chr12.44177822-44458887	52	35	2	3	G1,G2
35	chr16.21124303-21180085	chr16.21292150-21350798	chr20.20068064-20136570	47	47	1	1	G1,G2
36	chr16.69476895-69596799	chr16.70729760-70851081	chr20.71750160-71640892	54	28	3	5	G1,G2
37	chr2.157796965-157847701	chr2b.161854275-161906568	chr12.20833127-20885370	45	47	2	1	G1,G2
38	chr8.2379570-2619633	chr8.2435911-2692882	chr8.2344268-2725808	52	34	3	3	G1,G2
39	chr11.120709592-120804687	chr11.120266558-120360486	chr14.119759073-119854378	52	37	4	1	G1,G2
40	chr5.22107009-22340223	chr5.93935554-93686233	chr6.22137481-22381658	39	41	1	8	G1,G2
41	chr7.51064715-51096669	chr7.51993380-52026742	chr3.75336872-75304407	51	32	4	4	G1,G2
42	chr4.190274352-190633225	chr4.193847451-194201853	chr5.181227763-181545088	42	35	2	9	G1,G2
43	chr8.2628044-2695627	chr8.2701802-2774055	chr8.2733371-2790369	43	49	1	2	G1,G2
44	chr7.51099004-51118670	chr7.52029088-52048757	chr3.75302072-75282374	50	34	3	4	G1,G2
45	chr6.127134985-127172185	chr6.128978831-129016058	chr4.137149827-137112738	49	42	4	0	G1,G2
46	chr7.51278973-51340717	chr7.52207705-52269357	chr3.75126883-75062081	49	38	4	2	G1,G2
47	chr17.75032843-75039684	chr17.79224162-79231194	chr16.74784450-74791197	0	1	33	16	G1,G2
48	chr1.143743717-143750963	chr1.114299768-114292546	chr1.123159959-123152994	37	43	1	8	G1,G2
49	chr18.903847-1222107	chr18.15878977-15557403	chr18.13187013-12868449	46	36	2	6	G1,G2
50	chr1.69860272-70069147	chr1.70848088-71063394	chr1.72381425-72598721	56	31	5	0	G1,G2
51	chr5.59800275-60082811	chr5.55286832-54999552	chr6.58154444-58457351	48	31	4	6	G1,G2
52	chr7.51196837-51233648	chr7.52126052-52163163	chr3.75202953-75166274	48	35	4	4	G1,G2
53	chr7.51080298-51110828	chr7.52009898-52040914	chr3.75320579-75290215	52	30	4	4	G1,G2
54	chr5.22845151-23335365	chr5.93176383-92674256	chr6.22897345-23395124	45	34	3	7	G1,G2
55	chr22.15905895-15922689	chr22.15906843-15926413	chr10.61665051-61681426	32	57	0	5	G1,G2
56	chr1.143751015-143758815	chr1.114292494-114284716	chr1.123152942-123145416	41	43	1	6	G1,G2
57	chr6.126986628-127075416	chr6.128826664-128919042	chr4.137294516-137209019	41	53	1	1	G1,G2
58	chr1.143734516-143742802	chr1.114308733-114300673	chr1.123167560-123160850	48	40	3	2	G1,G2
59	chr2.157832337-157860220	chr2b.161891066-161919966	chr12.20869428-20897717	44	43	3	3	G1,G2
60	chr15.77535791-77537540	chr15.77394216-77395965	chr7.58583413-58585162	44	50	3	0	G1,G2
61	chr18.4347753-4361506	chr18.12314928-12301220	chr18.9822971-9809715	44	35	3	7	G1,G2
62	chr14.37290765-37909758	chr14.36894643-37525829	chr7.100751188-101323516	54	28	5	3	G1,G2
63	chr1.143747012-143752953	chr1.114296475-114290556	chr1.123156671-123150993	36	43	0	9	G1,G2
64	chr7.51167902-51221654	chr7.52096880-52151180	chr3.75232410-75178344	47	34	4	5	G1,G2
65	chr15.41661352-41664209	chr15.40715321-40718173	chr7.22024691-22027550	1	0	34	15	G1,G2
66	chr6.126829453-127031172	chr6.128660907-128871776	chr4.137454637-137249612	35	50	1	6	G1,G2
67	chrX.71938984-72141312	chrX.72124493-72328203	chrX.71717130-72068906	0	0	35	14	G1,G2
68	chr12.68670819-68771779	chr12.70321410-70416021	chr11.66951611-67043118	39	48	2	4	G1,G2
69	chr16.21098213-21122991	chr16.21264323-21290836	chr20.20040562-20066776	39	48	2	4	G1,G2
70	chr11.8442024-8560374	chr11.8344912-8468719	chr14.63487551-63367178	47	42	3	2	G1,G2
71	chr10.46425775-46549138	chr10.46734083-46860755	chr9.49504118-49670348	49	36	5	2	G1,G2
72	chr5.21791677-22087930	chr5.94267581-93960196	chr6.21797882-22115834	42	39	3	7	G1,G2
73	chr9.3111723-3168580	chr9.3156617-3213393	chr15.74119012-74063132	39	35	1	11	G1,G2
74	chr9.2974453-3053820	chr9.3025213-3106887	chr15.74261048-74181218	38	52	2	3	G1,G2
75	chr18.4355702-4366430	chr18.12307032-12296298	chr18.9815846-9804842	44	36	4	5	G1,G2
76	chr12.94227905-94305503	chr12.96300015-96380014	chr11.96539821-96612100	46	35	3	6	G1,G2
77	chrX.26949356-27099986	chrX.27167601-27318284	chrX.24882911-25025237	48	32	5	4	G1,G2
78	chr6.126661886-126809508	chr6.128490180-128640455	chr4.137617947-137473469	42	39	2	7	G1,G2
79	chr1.143712175-143734414	chr1.114331499-114308835	chr1.123196053-123167662	41	38	3	8	G1,G2
80	chr11.8305176-8504062	chr11.8205065-8411532	chr14.63634781-63430373	44	38	4	5	G1,G2
81	chr6.127155504-127209260	chr6.128999373-129053090	chr4.137129641-137076163	47	40	5	1	G1,G2
82	chr1.69955109-70157674	chr1.70944247-71148381	chr1.72480084-72675124	53	33	6	0	G1,G2
83	chrX.155896-2418628	chrX.94943-2417458	chr7.1208800-101812	0	0	28	22	G1,G2
84	chr15.77537751-77549706	chr15.77396176-77408249	chr7.58585373-58597550	39	51	3	1	G1,G2
85	chr18.4336869-4355339	chr18.12327294-12307393	chr18.9834023-9816230	39	33	3	11	G1,G2
86	chr9.74165506-74167514	chr9.71149822-71151836	chr15.81117938-81119981	44	39	3	5	G1,G2
87	chr16.69428883-69535224	chr16.70683259-70789112	chr20.71795656-71698241	42	40	4	4	G1,G2
88	chr8.2721287-2784657	chr8.2799456-2865537	chr8.2834226-3002130	46	39	4	2	G1,G2
89	chr7.51224263-51268576	chr7.52153773-52197302	chr3.75175688-75137237	45	38	5	3	G1,G2
90	chr8.145456611-145459931	chr8.144247951-144251094	chr8.146882982-146886471	0	0	27	23	G1,G2
91	chr15.41651262-41653443	chr15.40705307-40707484	chr7.22014115-22016316	0	0	27	24	G1,G2
92	chr9.2869548-2972898	chr9.2920508-3023656	chr15.74358282-74262601	39	48	2	4	G1,G2
93	chr1.143706800-143711904	chr1.114336864-114331770	chr1.123201336-123196323	42	37	4	6	G1,G2
94	chr11.11937491-11940317	chr11.11931134-11933889	chr14.59955264-59952532	42	45	4	2	G1,G2
95	chr1.143740147-143746615	chr1.114303437-114296872	chr1.123163620-123157059	42	44	3	3	G1,G2
96	chr2.8282299-8407165	chr2a.8401108-8528924	chr13.8300129-8433798	42	42	3	4	G1,G2
97	chr7.50816893-51063398	chr7.51732337-51992063	chr3.75580171-75338189	47	27	6	6	G1,G2
98	chr10.46423349-46447119	chr10.46731659-46755378	chr9.49501702-49553378	44	38	5	3	G1,G2
99	chr6.126734589-126966519	chr6.128564355-128806917	chr4.137547331-137314634	35	37	1	12	G1,G2
100	chr1.191047430-191233575	chr1.172619980-172803086	chr1.177795606-177609407	34	51	2	5	G1,G2
101	chr15.41647475-41652602	chr15.40700055-40706643	chr7.22010337-22015472	0	0	31	18	G1,G2
102	chr9.138081612-138082168	chr9.136152385-136152938	chr15.2263592-2263039	0	0	26	23	G1,G2
103	chr12.68774910-68831190	chr12.70419040-70476432	chr11.67048115-67102954	41	50	4	0	G1,G2
104	chr15.77536853-77545693	chr15.77395278-77404220	chr7.58584475-58593587	42	51	3	0	G1,G2
105	chr12.93695902-93767705	chr12.95755347-95830368	chr11.96004221-96074903	41	33	4	9	G1,G2
106	chr4.43505683-43730875	chr4.44234421-44467012	chr5.38955280-39173410	44	37	5	4	G1,G2
107	chr6.127112099-127153001	chr6.128955970-128996876	chr4.137172605-137132067	44	43	4	1	G1,G2
108	chr11.120780685-120824389	chr11.120335788-120380340	chr14.119831828-119874655	52	31	8	0	G1,G2
109	chr18.38961770-39100951	chr18.39250021-39400334	chr18.36123633-36264480	36	39	3	9	G1,G2
110	chr5.21891311-22224358	chr5.94157492-93804555	chr6.21904860-22255666	37	35	2	11	G1,G2
111	chr7.51111468-51143390	chr7.52041554-52073388	chr3.75289578-75256817	49	31	6	3	G1,G2
112	chr7.51055748-51064436	chr7.51984382-51993101	chr3.75345670-75337151	46	33	6	4	G1,G2
113	chrX.27060182-27210808	chrX.27277671-27434324	chrX.24985778-25136622	46	36	5	3	G1,G2
114	chr1.143693957-143706562	chr1.114356498-114337104	chr1.123210739-123201578	39	37	4	7	G1,G2
115	chr2.120613293-120620371	chr2b.120788718-120796216	chr13.126355335-126362886	40	45	4	3	G1,G2
116	chr9.12812038-12909185	chr9.13164301-13265863	chr15.64106417-64007627	42	44	5	1	G1,G2
117	chr22.38039719-38041417	chr22.38273666-38275365	chr10.83219356-83221084	33	44	1	10	G1,G2
118	chr6.109092055-109092435	chr6.110509992-110510372	chr4.155232378-155231998	0	0	30	20	G1,G2
119	chr15.41662911-41673488	chr15.40716880-40727748	chr7.22026253-22037923	0	0	30	20	G1,G2
120	chr9.3523134-3740479	chr9.3572692-3791267	chr15.73701894-73460512	47	27	7	5	G1,G2
121	chr14.95627748-95628430	chr14.96382341-96383023	chr7.159324393-159325079	36	35	3	11	G1,G2
122	chr7.51063480-51078845	chr7.51992145-52008445	chr3.75338107-75322360	45	34	6	4	G1,G2
123	chr6.127331598-127357802	chr6.129179732-129206377	chr4.136951232-136926859	44	39	6	2	G1,G2
124	chr17.19273750-19296241	chr17.36862906-36843048	chr16.18985406-19005588	42	41	4	3	G1,G2
125	chr12.45177220-45757709	chr12.43277206-42689287	chr11.43529764-44108573	39	39	4	6	G1,G2
126	chr6.109092251-109092637	chr6.110510188-110510574	chr4.155232182-155231796	0	0	24	25	G1,G2
127	chr15.41652854-41653869	chr15.40706895-40707910	chr7.22015727-22016740	0	0	24	26	G1,G2
128	chr11.11938804-11941455	chr11.11932451-11935028	chr14.59953925-59951407	32	45	2	9	G1,G2
129	chr17.75037294-75042150	chr17.79228803-79233646	chr16.74788797-74793671	2	2	31	16	G1,G2
130	chr7.51236903-51312661	chr7.52165980-52241338	chr3.75162989-75091268	44	39	6	2	G1,G2
131	chr9.99130701-99176256	chr9.96523944-96569188	chr15.38885356-38844023	44	41	6	1	G1,G2
132	chr8.2786680-2812721	chr8.2867560-2893570	chr8.3004150-3029273	44	33	5	6	G1,G2
133	chr9.2909429-3016865	chr9.2959889-3067258	chr15.74326588-74218721	36	51	2	4	G1,G2
134	chr12.45092869-45376991	chr12.43363802-43076328	chr11.43448021-43729850	39	46	3	4	G1,G2
135	chr1.232608055-232612454	chr1.215088446-215092859	chr1.222617569-222612975	37	45	4	4	G1,G2
136	chr4.184622532-184661755	chr4.188115947-188155378	chr5.175581289-175619504	37	43	4	5	G1,G2
137	chr16.21081576-21118641	chr16.21247030-21286481	chr20.20022872-20062359	38	40	4	6	G1,G2
138	chr2.163320292-163336020	chr2b.167471595-167487246	chr12.26331916-26346721	46	35	7	2	G1,G2
139	chr14.61112123-61156849	chr14.60975747-61020882	chr7.124573445-124617695	2	2	31	17	G1,G2
140	chr8.2761456-2800237	chr8.2842121-2881101	chr8.2925389-3017108	42	36	6	4	G1,G2
141	chr12.68723865-68803463	chr12.70368851-70448531	chr11.66998322-67076586	36	51	4	2	G1,G2
142	chr2.157848725-157869735	chr2b.161907595-161929472	chr12.20886398-20907563	36	38	4	8	G1,G2
143	chr15.41642750-41651232	chr15.40693177-40705277	chr7.22005645-22014085	0	0	27	23	G1,G2
144	chr3.149144724-149157397	chr3.152778731-152791720	chr2.139822611-139809913	0	1	27	21	G1,G2
145	chr2.163278029-163297046	chr2b.167428636-167447794	chr12.26290806-26309696	49	33	7	1	G1,G2
146	chr1.246173786-246260590	chr1.229070570-229157642	chr1.208971475-208862792	45	35	6	3	G1,G2
147	chr2.163218015-163243355	chr2b.167368392-167393723	chr12.26232706-26258216	50	32	8	0	G1,G2
148	chr19.45072273-45113085	chr19.45448832-45490541	chr19.46250390-46311946	0	0	22	27	G1,G2
149	chr16.2555866-2562586	chr16.2685084-2691788	chr20.2587401-2594521	0	0	22	28	G1,G2
150	chr9.135424411-135458340	chr9.133663385-133699403	chr15.4973228-4938297	47	31	7	3	G1,G2
151	chr9.138373674-138376381	chr9.136596384-136599088	chr15.1946062-1943051	1	3	25	22	G1,G2
152	chr1.204644011-204646621	chr1.186793358-186795963	chr1.163958300-163955623	1	0	26	23	G1,G2
153	chr3.158376548-158608959	chr3.162182710-162419943	chr2.130485511-130248464	44	31	6	5	G1,G2
154	chr6.127175772-127238199	chr6.129019659-129079801	chr4.137109152-137050540	42	44	5	1	G1,G2
155	chr8.62081214-62286446	chr8.59133427-59336075	chr8.63580500-63765742	46	35	7	2	G1,G2
156	chr1.143732501-143739824	chr1.114310746-114303758	chr1.123169568-123163946	38	34	4	9	G1,G2
157	chr1.143771453-143812520	chr1.114272267-114237711	chr1.123139287-123093981	35	34	3	12	G1,G2
158	chr2.120617115-120637458	chr2b.120792961-120814654	chr13.126359621-126380764	35	43	3	8	G1,G2
159	chr9.3021953-3093302	chr9.3072339-3145885	chr15.74213345-74133972	31	50	3	6	G1,G2
160	chrX.2416345-2529517	chrX.2414594-2531681	chrX.99530-219940	0	0	21	29	G1,G2
161	chr6.127219904-127249145	chr6.129061515-129090737	chr4.137071118-137033286	43	43	6	0	G1,G2
162	chr18.8674970-8694327	chr18.7927020-7907488	chr18.5694282-5675827	43	31	6	6	G1,G2
163	chr9.512789-639809	chr9.514810-643721	chr15.76677850-76553367	44	32	6	5	G1,G2
164	chr8.145368334-145454135	chr8.144228002-144244768	chr8.146855066-146880545	0	0	25	25	G1,G2
165	chr9.138080242-138081892	chr9.136150724-136152662	chr15.2264946-2263315	0	0	26	24	G1,G2
166	chr15.32536765-32562445	chr15.31325955-31351689	chr7.12690348-12715542	1	2	24	24	G1,G2
167	chr2.163344684-163362480	chr2b.167495898-167513707	chr12.26355336-26373135	40	44	6	2	G1,G2
168	chr2.8413939-8486755	chr2a.8535697-8610925	chr13.8441005-8514378	45	33	7	3	G1,G2
169	chr4.173223671-173479682	chr4.176520906-176777008	chr5.164136978-164398554	37	35	4	9	G1,G2
170	chr1.143590651-143626939	chr1.114461787-112114555	chr1.123319396-127366628	36	35	5	9	G1,G2
171	chr14.70010603-70059206	chr14.70115365-70165232	chr7.133595248-133621617	36	50	5	1	G1,G2
172	chr1.84744286-84807665	chr1.85930371-85994559	chr1.87298103-87361109	34	37	4	10	G1,G2
173	chr6.127034467-127105776	chr6.128876116-128949658	chr4.137246355-137178870	34	56	3	1	G1,G2
174	chr14.70103476-70117157	chr14.70206463-70220639	chr7.133659461-133669149	47	31	8	2	G1,G2
175	chr12.68806204-68850306	chr12.70451272-70495824	chr11.67079775-67116184	44	39	8	0	G1,G2
176	chr9.138064418-138081501	chr9.136134292-136152274	chr15.2284257-2263703	1	0	24	25	G1,G2
177	chr8.145454221-145458899	chr8.144244855-144250062	chr8.146880631-146885446	0	0	24	25	G1,G2
178	chr4.174608867-174790843	chr4.177922066-178106114	chr5.165506749-165678176	36	37	5	8	G1,G2
179	chr4.156604703-156605172	chr4.159693014-159693484	chr5.147648486-147649294	36	35	4	9	G1,G2
180	chr22.15916999-15968433	chr22.15920750-15975059	chr10.61676745-61744710	33	52	4	3	G1,G2
181	chr1.95021777-95116793	chr1.96290749-96387726	chr1.97803081-97899575	32	52	4	3	G1,G2
182	chr2.6906844-6971090	chr2a.7010287-7076886	chr13.6918848-6983861	34	39	3	10	G1,G2
183	chr2.135288212-135357700	chr2b.138968494-139036197	chr13.117363034-117289563	34	45	3	7	G1,G2
184	chr5.75929133-75973500	chr5.39254510-39208779	chr6.72754234-72800105	2	1	31	17	G1,G2
185	chr2.163389190-163400923	chr2b.167547065-167558816	chr12.26399174-26410887	43	39	7	1	G1,G2
186	chr15.41664335-41674457	chr15.40718299-40728718	chr7.22027677-22038882	0	0	19	31	G1,G2
187	chr15.41673507-41674860	chr15.40727767-40729121	chr7.22037938-22039286	0	0	19	31	G1,G2
188	chr8.145371131-145456527	chr8.144230814-144247867	chr8.146857917-146882898	0	0	24	26	G1,G2
189	chr18.38953912-38968575	chr18.39242168-39256849	chr18.36115796-36130924	35	32	4	11	G1,G2
190	chr8.86350331-86471647	chr8.83941345-84066275	chr8.87779209-87901321	45	32	8	2	G1,G2
191	chr8.86415865-86563396	chr8.84009417-84159801	chr8.87843013-87987778	40	35	7	5	G1,G2
192	chr16.2551823-2555704	chr16.2681042-2684922	chr20.2583365-2587238	2	0	26	23	G1,G2
193	chr17.42119827-42132674	chr17.11010248-10996641	chr16.56138736-56125599	2	2	26	22	G1,G2
194	chr21.46107561-46117053	chr21.45530166-45539677	chr3.902570-892907	2	3	29	18	G1,G2
195	chr3.224014-229128	chr3.262556-267668	chr2.60828660-60823536	2	2	29	18	G1,G2
196	chr2.8370370-8449197	chr2a.8491423-8573202	chr13.8388745-8476610	42	34	7	4	G1,G2
197	chr1.26637332-26641871	chr1.26668232-26672776	chr1.29066036-29071295	42	35	8	3	G1,G2
198	chr2.163069292-163109850	chr2b.167218803-167259141	chr12.26086563-26125052	42	39	8	1	G1,G2
199	chr2.157861916-157884134	chr2b.161921662-161943870	chr12.20899414-20922050	36	35	6	8	G1,G2
200	chr9.78515972-78564643	chr9.75584505-75632890	chr15.85454399-85502186	36	44	6	3	G1,G2
201	chr4.173755403-173999031	chr4.177052344-177304034	chr5.164659254-164906251	37	36	5	7	G1,G2
202	chr2.104843028-104879162	chr2a.105978611-106016261	chr13.104764816-104802645	37	30	6	10	G1,G2
203	chr8.62041316-62155169	chr8.59093238-59208428	chr8.63542902-63651664	44	35	9	1	G1,G2
204	chr2.120601796-120617103	chr2b.120777190-120792949	chr13.126332108-126359609	34	48	4	4	G1,G2
205	chr4.173304257-173567302	chr4.176601261-176863752	chr5.164219946-164471778	34	39	4	9	G1,G2
206	chr5.44760261-44830122	chr5.70771470-70701342	chr6.44833992-44894022	34	47	4	4	G1,G2
207	chr5.21628555-21875991	chr5.94425118-94173379	chr6.21642216-21891413	34	43	5	6	G1,G2
208	chr14.37748691-38158390	chr14.37360377-37783953	chr7.101174733-101607744	34	39	5	8	G1,G2
209	chr18.4367786-4387028	chr18.12294943-12274775	chr18.9795688-9776177	34	41	5	7	G1,G2
210	chr2.162996706-163020995	chr2b.167145336-167170461	chr12.26005313-26030031	39	43	7	2	G1,G2
211	chr17.45949977-45968010	chr17.49504494-49522749	chr16.34757552-34776113	1	3	22	25	G1,G2
212	chr8.145250314-145275463	chr8.144104585-144133310	chr8.146738267-146763285	0	0	22	27	G1,G2
213	chr19.45054709-45077837	chr19.45427815-45454386	chr19.46232631-46255958	0	0	22	27	G1,G2
214	chr22.49561077-2415967	chr22.50134452-2414211	chr10.94804056-99151	0	3	22	25	G1,G2
215	chr15.41674496-41675425	chr15.40728757-40729686	chr7.22038921-22039849	0	0	18	32	G1,G2
216	chr2.120638875-120641989	chr2b.120816080-120819962	chr13.126382247-126385357	31	49	4	6	G1,G2
217	chr2.163354027-163373666	chr2b.167505244-167529988	chr12.26364679-26383755	42	36	7	3	G1,G2
218	chr9.74166447-74168286	chr9.71150769-71152612	chr15.81118900-81120760	42	32	7	5	G1,G2
219	chr5.86958635-87153356	chr5.28043348-27846828	chr6.83901584-84106411	41	32	8	5	G1,G2
220	chr2.8171512-8359721	chr2a.8287117-8479970	chr13.8196823-8378145	36	47	5	2	G1,G2
221	chr10.46421620-46425406	chr10.46729930-46733716	chr9.49500050-49503753	36	47	5	2	G1,G2
222	chr12.68596440-68719536	chr12.70248458-70364032	chr11.66884958-66994282	36	47	5	2	G1,G2
223	chr17.73617306-73622850	chr17.77775599-77781627	chr16.73401472-73407194	2	1	25	23	G1,G2
224	chr2.163329293-163342614	chr2b.167480531-167493829	chr12.26340883-26353275	43	35	9	1	G1,G2
225	chr9.99110312-99162132	chr9.96502282-96555341	chr15.38909133-38857834	43	39	8	0	G1,G2
226	chr4.174582323-174624717	chr4.177895604-177937890	chr5.165480099-165530036	39	38	6	5	G1,G2
227	chr5.21606686-21787446	chr5.94449180-94272030	chr6.21622409-21793919	38	42	6	3	G1,G2
228	chr6.127078139-127131831	chr6.128921767-128975676	chr4.137206300-137152995	33	55	4	1	G1,G2
229	chr8.89547381-89782391	chr8.87226067-87456541	chr8.91124213-91352929	33	37	4	10	G1,G2
230	chr4.156513807-156604762	chr4.159598757-159693073	chr5.147559378-147648545	32	35	5	11	G1,G2
231	chr15.45366999-45705954	chr15.44507712-44853519	chr7.25609245-25943972	41	31	7	6	G1,G2
232	chr14.70095271-70113754	chr14.70198256-70216817	chr7.133651302-133665762	42	35	9	2	G1,G2
233	chr6.151357745-151372682	chr6.153733494-153749406	chr4.112115386-112100332	42	36	8	2	G1,G2
234	chr2.163008372-163047279	chr2b.167157841-167196771	chr12.26017079-26059759	42	37	8	1	G1,G2
235	chr12.29195886-29330892	chr12.59803045-59666492	chr11.29481414-29621010	42	35	8	2	G1,G2
236	chrX.52952660-52955106	chrX.53325182-53327628	chrX.51244766-51247207	0	0	17	33	G1,G2
237	chr12.8976686-8981920	chr12.9251900-9257139	chr11.9080720-9085938	2	1	24	24	G1,G2
238	chr8.145350057-145370799	chr8.144207017-144230465	chr8.146841463-146857499	2	0	24	24	G1,G2
239	chr6.101749593-101924664	chr6.102832145-103007848	chr4.97116132-97314895	44	34	9	1	G1,G2
240	chr5.150827557-150832711	chr5.153452094-153457534	chr6.147901009-147906055	36	40	7	4	G1,G2
241	chr14.95626649-95627378	chr14.96381240-96381971	chr7.159323294-159324023	31	37	5	10	G1,G2
242	chr12.68873003-68887498	chr12.70518357-70530614	chr11.67139851-67151657	39	36	8	4	G1,G2
243	chr15.77513173-77536613	chr15.77372318-77395038	chr7.58559528-58584235	39	42	8	1	G1,G2
244	chr7.153460419-153462304	chr7.154772369-154775547	chr3.191118963-191120846	4	0	28	19	G1,G2
245	chr2.120642001-120649002	chr2b.120819974-120827692	chr13.126385369-126393079	34	51	6	1	G1,G2
246	chr4.43481376-43586901	chr4.44210194-44318562	chr5.38927748-39027849	41	39	8	1	G1,G2
247	chr6.127346037-127363132	chr6.129194613-129211735	chr4.136937985-136921275	41	39	8	1	G1,G2
248	chr10.44655065-44780269	chr10.45097485-45229136	chr9.45011375-45137011	41	38	8	2	G1,G2
249	chr2.163050641-163082873	chr2b.167200106-167232215	chr12.26063058-26099750	40	39	9	1	G1,G2
250	chr1.25794870-25808502	chr1.25796634-25809716	chr1.28199191-28212818	43	35	9	1	G1,G2
251	chr2.163286425-163305594	chr2b.167436978-167456663	chr12.26298949-26318276	43	35	9	1	G1,G2
252	chr14.95625080-95625632	chr14.96379711-96380265	chr7.159321721-159322283	42	35	10	1	G1,G2
253	chr7.143186265-143191096	chr7.144442226-144446945	chr3.181240868-181245547	0	0	20	29	G1,G2
254	chr11.46350504-46351182	chr11.46889222-46889900	chr14.25754565-25753887	0	0	20	29	G1,G2
255	chr15.41653464-41656318	chr15.40707505-40710359	chr7.22016337-22019496	1	0	20	29	G1,G2
256	chr8.136734450-137241346	chr8.135391108-135905853	chr8.138201316-138691721	36	31	7	9	G1,G2
257	chr17.36232701-36267405	chr17.16691664-16656393	chr16.50940081-50973768	2	4	23	23	G1,G2
258	chr11.46354004-46354515	chr11.46893407-46893918	chr14.25751136-25750627	2	0	22	26	G1,G2
259	chr12.8974684-8977771	chr12.9249894-9252982	chr11.9078731-9081818	2	3	22	25	G1,G2
260	chr2.120599636-120611122	chr2b.120775024-120786555	chr13.126330005-126352964	31	52	4	3	G1,G2
261	chr18.4379812-4394165	chr18.12282258-12267640	chr18.9783747-9768585	31	39	4	10	G1,G2
262	chr10.46387509-46419220	chr10.46692133-46724714	chr9.49464227-49497643	39	46	7	0	G1,G2
263	chr12.68866774-68877174	chr12.70512272-70522255	chr11.67133624-67144025	39	38	7	4	G1,G2
264	chr6.127325168-127342644	chr6.129173278-129191221	chr4.136957662-136941337	38	44	7	1	G1,G2
265	chr14.69951209-70052100	chr14.70056213-70157772	chr7.133518901-133614475	38	39	7	4	G1,G2
266	chr2.162912458-162964951	chr2b.167058550-167113548	chr12.25919085-25972881	39	35	9	3	G1,G2
267	chr5.131659073-131677312	chr5.133916734-133934896	chr6.128709333-128727826	39	33	9	4	G1,G2
268	chr2.142120458-142130537	chr2b.145953032-145963088	chr12.5154238-5162067	33	34	6	10	G1,G2
269	chr17.63800204-63834543	chr17.67626746-67661332	chr16.63574364-63607702	33	33	6	11	G1,G2
270	chr2.6966635-6977138	chr2a.7072422-7082920	chr13.6979444-6989483	34	44	5	5	G1,G2
271	chr5.131688278-131712487	chr5.133945957-133969866	chr6.128739109-128762616	35	38	7	6	G1,G2
272	chr11.114750607-114752880	chr11.114155176-114157475	chr14.113796973-113799153	35	36	7	7	G1,G2
273	chr1.143703001-143709390	chr1.114346337-114334275	chr1.123205194-123198719	35	41	6	5	G1,G2
274	chr18.4361962-4379182	chr18.12300763-12282888	chr18.9809258-9784372	35	39	6	6	G1,G2
275	chr2.142596180-142603280	chr2b.146435246-146442646	chr12.5645462-5652551	36	30	6	10	G1,G2
276	chr2.53659299-53734963	chr2a.54856858-54929229	chr13.53845756-53921921	2	2	25	22	G1,G2
277	chr9.116281724-116302171	chr9.113957057-113977423	chr15.21648747-21628350	2	2	25	23	G1,G2
278	chr5.154768438-154768500	chr5.157406700-157406765	chr6.151775221-151775286	1	0	18	31	G1,G2
279	chr11.46350962-46352567	chr11.46889680-46891970	chr14.25754107-25752566	1	0	18	31	G1,G2
280	chrX.52953775-52959042	chrX.53326297-53331561	chrX.51245873-51251170	0	0	19	30	G1,G2
281	chr2.100077580-100086848	chr2a.101092269-101102474	chr13.100049765-100058987	1	0	19	30	G1,G2
282	chr12.68854327-68872015	chr12.70499845-70517373	chr11.67120692-67139025	37	41	7	3	G1,G2
283	chr2.7281521-7428100	chr2a.7387071-7540502	chr13.7285619-7438326	36	39	8	4	G1,G2
284	chr8.136626790-136666847	chr8.135265933-135321337	chr8.138095948-138134396	36	29	8	9	G1,G2
285	chr2.100070479-100082805	chr2a.101085168-101098208	chr13.100042672-100055027	2	1	22	26	G1,G2
286	chr2.75738702-75744990	chr2a.77302799-77309092	chr13.75960632-75973310	39	39	9	2	G1,G2
287	chr7.65618824-65641836	chr7.66135526-66158604	chr3.51991350-52023968	39	34	8	4	G1,G2
288	chr2.8010896-8276696	chr2a.8124593-8395483	chr13.8028758-8294557	39	37	8	3	G1,G2
289	chr6.127306347-127324484	chr6.129154237-129172593	chr4.136976853-136958339	39	43	8	0	G1,G2
290	chr2.39858550-40072643	chr2a.40669732-40920779	chr13.39767057-40007151	42	34	9	2	G1,G2
291	chr1.94962888-95072835	chr1.96225964-96343777	chr1.97742504-97856291	31	47	6	5	G1,G2
292	chr15.41654500-41660849	chr15.40708541-40714818	chr7.22017697-22024187	3	0	27	20	G1,G2
293	chr1.1560894-1583625	chr1.1561431-1587112	chr1.4698210-4727308	3	3	27	20	G1,G2
294	chr17.69957977-70047841	chr17.73984933-74082227	chr16.69728949-69806956	4	2	27	20	G1,G2
295	chr7.31830296-31902507	chr7.32178400-32251371	chr3.94401790-94326131	34	31	7	10	G1,G2
296	chr4.76953398-77026239	chr4.54674758-54601579	chr5.53766349-53694438	34	35	6	9	G1,G2
297	chr9.571855-721199	chr9.574518-730742	chr15.76620757-76469915	34	33	7	9	G1,G2
298	chr2.12798463-13058014	chr2a.12980276-13243495	chr13.12784881-13041821	36	35	8	6	G1,G2
299	chr8.12908874-12910985	chr8.8965060-8967174	chr8.12766893-12768999	36	42	7	3	G1,G2
300	chr11.22260676-22397467	chr11.22314527-22452973	chr14.49585039-49457829	2	2	24	24	G1,G2
301	chr1.204641434-204643619	chr1.186790779-186792966	chr1.163960876-163958692	2	3	24	22	G1,G2
302	chr17.52198693-52254258	chr17.55905505-55960486	chr16.40986440-41041649	2	3	24	23	G1,G2
303	chr2.163205896-163227780	chr2b.167356281-167378157	chr12.26215549-26242757	39	42	8	1	G1,G2
304	chr14.70053221-70093826	chr14.70159245-70196801	chr7.133615582-133649836	39	44	8	0	G1,G2
305	chr1.76033218-76318105	chr1.77092777-77381096	chr1.78597844-78917459	38	31	9	6	G1,G2
306	chr9.78568739-78631992	chr9.75636993-75699876	chr15.85506285-85568878	38	31	9	6	G1,G2
307	chr2.39977060-40179831	chr2a.40824319-41028776	chr13.39916742-40122071	37	33	9	5	G1,G2
308	chr16.2554021-2558694	chr16.2683239-2687916	chr20.2585562-2590553	0	0	18	31	G1,G2
309	chr7.143181603-143188371	chr7.144437542-144444213	chr3.181236208-181242783	1	0	18	31	G1,G2
310	chr18.17288668-17324100	chr18.17205509-17243221	chr18.14448687-14482419	1	2	17	31	G1,G2
311	chr20.9767641-9964694	chr20.9825667-9996455	chr10.43147314-43317225	40	33	10	3	G1,G2
312	chr2.75745251-75759859	chr2a.77309354-77324661	chr13.75973570-75988158	39	33	10	3	G1,G2
313	chr2.163244165-163270011	chr2b.167394533-167420625	chr12.26259021-26282778	40	34	9	3	G1,G2
314	chr2.163306852-163328060	chr2b.167457804-167479298	chr12.26319357-26339661	40	35	9	2	G1,G2
315	chr7.88075043-88227825	chr7.88222419-88375449	chr3.128664797-128500953	2	3	21	26	G1,G2
316	chr6.109092454-109094919	chr6.110510391-110512860	chr4.155231979-155229889	2	1	21	27	G1,G2
317	chr15.32551115-32585889	chr15.31340358-31375141	chr7.12706161-12730810	2	1	21	27	G1,G2
318	chr2.135340707-135394997	chr2b.139019222-139073882	chr13.117306978-117251189	31	36	6	10	G1,G2
319	chr8.145459026-145470440	chr8.144250189-144259137	chr8.146885570-146896830	3	0	26	21	G1,G2
320	chr9.116214641-116223644	chr9.113886299-113895778	chr15.21715470-21706140	3	1	26	21	G1,G2
321	chr1.184823613-185364281	chr1.166337262-166873135	chr1.184132677-183595339	33	33	6	10	G1,G2
322	chr15.77547662-77641642	chr15.77406193-77500453	chr7.58595527-58681053	33	40	6	7	G1,G2
323	chr5.24573814-24582218	chr5.91437413-91429021	chr6.24552367-24560774	33	34	7	9	G1,G2
324	chr9.3143608-3209264	chr9.3188524-3255041	chr15.74088133-74018326	34	35	6	9	G1,G2
325	chr15.41674877-41675513	chr15.40729138-40729774	chr7.22039303-22039937	0	0	14	36	G1,G2
326	chr9.2827226-2905019	chr9.2876650-2955487	chr15.74401969-74330993	36	35	7	7	G1,G2
327	chr5.131669495-131686008	chr5.133927148-133943679	chr6.128719672-128736851	35	34	7	8	G1,G2
328	chr4.15869217-15975966	chr4.16198491-16306938	chr5.11075185-11183454	37	32	8	6	G1,G2
329	chr7.99631456-99640005	chr7.100050597-100059728	chr3.47491889-47500874	37	40	8	2	G1,G2
330	chr2.162966842-163006390	chr2b.167115438-167155878	chr12.25974769-26015162	39	37	9	2	G1,G2
331	chr2.163259095-163276524	chr2b.167409590-167427134	chr12.26274439-26289310	39	37	9	2	G1,G2
332	chr17.42103128-42126430	chr17.11026985-11002914	chr16.56155986-56132197	2	3	23	24	G1,G2
333	chr2.120648920-120650470	chr2b.120827610-120829167	chr13.126392995-126394544	30	40	5	9	G1,G2
334	chr14.95627446-95628167	chr14.96382039-96382760	chr7.159324091-159324813	30	38	5	10	G1,G2
335	chr15.41638759-41642168	chr15.40689190-40692596	chr7.22001316-22005076	2	3	20	28	G1,G2
336	chr1.76870160-77075712	chr1.77931569-78140147	chr1.79468749-79679118	0	0	17	32	G1,G2
337	chr7.153459335-153461314	chr7.154771284-154773263	chr3.191117875-191119855	4	3	25	21	G1,G2
338	chr1.142725419-142727145	chr1.186697669-186699410	chr1.164049575-164047843	34	30	8	10	G1,G2
339	chr2.112591353-112672837	chr2a.113071607-113153750	chr13.111533158-111613596	34	38	8	6	G1,G2
340	chr17.63932821-63954758	chr17.67760949-67784188	chr16.63693343-63716660	34	38	8	6	G1,G2
341	chr1.143635979-143641907	chr1.114414481-114408553	chr1.123275714-123269840	34	30	7	10	G1,G2
342	chr12.90966165-90988461	chr12.92950130-92972755	chr11.93266253-93289100	36	33	8	7	G1,G2
343	chr17.64828468-64831752	chr17.68685932-68689210	chr16.64570361-64573626	36	40	8	3	G1,G2
344	chr1.142726116-142730177	chr1.186698384-186702121	chr1.164048874-164046697	36	33	8	6	G1,G2
345	chr1.24558609-24616720	chr1.24586834-24644975	chr1.26996307-27055094	36	37	8	5	G1,G2
346	chr8.12909827-12913653	chr8.8966013-8969838	chr8.12767851-12770337	36	39	8	3	G1,G2
347	chr2.163270601-163285782	chr2b.167421215-167436335	chr12.26283370-26298273	38	35	9	3	G1,G2
348	chr6.80374672-80395861	chr6.80648531-80669768	chr4.75692596-75714887	38	36	9	3	G1,G2
349	chr1.74455773-74515385	chr1.75515585-75576058	chr1.77032741-77092517	37	33	10	5	G1,G2
350	chr6.126611875-126659450	chr6.128440713-128487758	chr4.137676884-137620695	37	35	10	3	G1,G2
351	chr15.32488287-32549580	chr15.31279286-31338819	chr7.8005203-12704539	2	3	22	24	G1,G2
352	chr1.53135945-53145443	chr1.53803147-53812580	chr1.55761634-55771864	28	40	6	9	G1,G2
353	chr1.72814168-73007518	chr1.73838844-74036673	chr1.75381937-75594249	28	48	6	5	G1,G2
354	chr1.245377577-245396034	chr1.228261560-228280937	chr1.209832900-209818338	31	44	7	5	G1,G2
355	chr2.120641517-120648909	chr2b.120819497-120827599	chr13.126384894-126392984	34	47	7	2	G1,G2
356	chr5.60056229-60098216	chr5.55025989-54984155	chr6.58431078-58471389	34	39	7	6	G1,G2
357	chr9.99163762-99214929	chr9.96556971-96608920	chr15.38856199-38806598	34	35	7	8	G1,G2
358	chr12.96411625-96444921	chr12.98511049-98544612	chr11.98714963-98746426	33	31	8	10	G1,G2
359	chr21.44621512-44676892	chr21.44014925-44073780	chr3.2341493-2283419	33	31	8	10	G1,G2
360	chr5.24538165-24548719	chr5.91473732-91462535	chr6.24517121-24527742	36	36	8	5	G1,G2
361	chr17.64829259-64833948	chr17.68686723-68691403	chr16.64571137-64575818	36	39	8	4	G1,G2
362	chr9.113553622-113619234	chr9.111205366-111271479	chr15.24358083-24293260	35	31	8	8	G1,G2
363	chr11.11936605-11938568	chr11.11930248-11932215	chr14.59956130-59954159	34	39	9	4	G1,G2
364	chr17.63928030-63937887	chr17.67755551-67766063	chr16.63688317-63698609	34	35	9	6	G1,G2
365	chr12.8977841-8984545	chr12.9253052-9259768	chr11.9081888-9088854	4	1	23	24	G1,G2
366	chr1.22984094-23073978	chr1.22960167-23049416	chr1.25374109-25464161	4	1	24	23	G1,G2
367	chr9.106614829-106626168	chr9.104129044-104140401	chr15.31427606-31415964	3	3	24	22	G1,G2
368	chr16.86736578-87026533	chr16.88522180-88817615	chr20.86283886-86581985	3	4	24	22	G1,G2
369	chr18.66548962-66593761	chr18.67499641-67539086	chr18.64286056-64316021	3	3	24	22	G1,G2
370	chr2.7254860-7344369	chr2a.7359329-7451282	chr13.7259941-7352476	36	39	10	2	G1,G2
371	chr17.41078677-41158708	chr17.11856317-11776226	chr16.56276457-56357692	39	36	11	1	G1,G2
372	chr1.25792567-25798312	chr1.25794347-25800816	chr1.28196955-28203754	39	36	10	1	G1,G2
373	chr7.143188418-143191887	chr7.144444260-144447736	chr3.181242830-181246338	0	0	17	33	G1,G2
374	chr15.41640212-41646405	chr15.40690643-40698997	chr7.22003094-22009247	0	1	16	33	G1,G2
375	chr2.217762108-217842120	chr2b.223072535-223156983	chr12.81000685-81082363	28	42	5	9	G1,G2
376	chr9.116296758-116306667	chr9.113972006-113981917	chr15.21633818-21623599	2	3	22	25	G1,G2
377	chr12.8983272-8985127	chr12.9258495-9260350	chr11.9087587-9089437	2	0	22	27	G1,G2
378	chr16.30107184-30116831	chr16.30582124-30593349	chr20.28165422-28174939	2	0	22	27	G1,G2
379	chr1.94889509-95016246	chr1.96150069-96285209	chr1.97660528-97797502	32	45	8	3	G1,G2
380	chr21.44595778-44637943	chr21.43988675-44031343	chr3.2365081-2325907	32	33	8	9	G1,G2
381	chr18.846660-1010267	chr18.15938166-15772518	chr18.13247641-13084375	32	34	7	9	G1,G2
382	chr4.88445005-88527916	chr4.90219701-90301291	chr5.80255371-80352266	38	36	10	2	G1,G2
383	chr1.74478220-74580461	chr1.75538788-75641075	chr1.77055747-77160028	34	31	8	8	G1,G2
384	chr15.20597566-20600575	chr15.20625832-20628831	chr7.1831007-1833929	34	34	8	7	G1,G2
385	chr10.46413155-46421314	chr10.46718441-46729623	chr9.49491626-49499745	34	41	9	3	G1,G2
386	chr18.38650478-38655067	chr18.38934802-38939572	chr18.35804780-35810180	34	37	9	5	G1,G2
387	chr1.233739517-233806059	chr1.216329307-216395983	chr1.221496920-221431726	36	35	10	4	G1,G2
388	chr9.78542198-78601084	chr9.75610781-75668949	chr15.85480554-85537342	36	35	9	4	G1,G2
389	chr15.79389206-79391739	chr15.79289597-79292118	chr7.60465215-60466651	36	38	9	3	G1,G2
390	chr3.136309452-136322053	chr3.139702630-139719798	chr2.152655106-152641542	4	1	23	24	G1,G2
391	chrX.52955634-53024696	chrX.53328156-53398122	chrX.51247763-51309474	4	4	23	23	G1,G2
392	chr5.175319676-175601694	chr5.178338547-178596248	chr6.172410459-172723844	3	0	23	24	G1,G2
393	chr17.41656881-42101912	chr17.11261907-11028199	chr16.56851606-56157203	3	3	23	23	G1,G2
394	chr11.76514184-76592866	chr11.75532227-75612823	chr14.75305757-75383668	4	3	22	23	G1,G2
395	chr2.102655193-102676252	chr2a.103761333-103782383	chr13.102576647-102597793	2	1	18	30	G1,G2
396	chr11.46354224-46355275	chr11.46893627-46894678	chr14.25750916-25749866	2	2	17	30	G1,G2
397	chrX.88150993-88622520	chrX.88394491-88870799	chrX.87709500-88210787	1	0	15	34	G1,G2
398	chr7.153483127-153488388	chr7.154796548-154799639	chr3.191141787-191147046	5	3	25	21	G1,G2
399	chr1.232610930-232622272	chr1.215091331-215102696	chr1.222614495-222603149	29	40	7	8	G1,G2
400	chr18.38671940-38678006	chr18.38956740-38962792	chr18.35827108-35833161	34	34	10	6	G1,G2
401	chr2.163376010-163388636	chr2b.167532077-167546506	chr12.26385792-26398559	35	43	9	1	G1,G2
402	chr16.75921877-75932567	chr16.77339060-77351407	chr20.75494943-75504541	35	39	9	3	G1,G2
403	chr21.46228745-46247942	chr21.45655773-45675141	chr3.795417-776675	35	39	9	3	G1,G2
404	chr9.376387-561865	chr9.373525-564600	chr15.76827483-76629791	35	34	10	5	G1,G2
405	chr1.228906597-228912454	chr1.211307257-211313118	chr1.226262938-226257071	32	32	9	8	G1,G2
406	chr3.7867411-8035513	chr3.8080473-8257098	chr2.53102713-52935339	32	37	9	6	G1,G2
407	chr17.63888377-63931753	chr17.67714924-67759248	chr16.63660287-63692287	32	31	9	9	G1,G2
408	chr1.53145596-53158118	chr1.53812733-53827395	chr1.55772017-55786051	34	39	8	5	G1,G2
409	chr21.32707889-32750991	chr21.32161779-32205051	chr3.14098541-14052801	34	33	8	8	G1,G2
410	chr9.106621275-106631796	chr9.104135502-104146027	chr15.31421154-31410129	3	2	23	24	G1,G2
411	chr1.1565002-1586032	chr1.1565536-1589602	chr1.4702717-4729862	3	3	22	25	G1,G2
412	chr7.153481901-153483857	chr7.154795310-154797278	chr3.191140531-191142510	5	3	24	22	G1,G2
413	chr2.163394913-163471391	chr2b.167552800-167622539	chr12.26404958-26486144	36	38	10	2	G1,G2
414	chr9.12805657-12816784	chr9.13156665-13170005	chr15.64112495-64101823	36	35	11	3	G1,G2
415	chr6.100079454-100095559	chr6.101137870-101154144	chr4.95464924-95480647	34	33	9	6	G1,G2
416	chr2.75741541-75750904	chr2a.77305641-77315006	chr13.75963776-75979219	34	38	10	4	G1,G2
417	chr1.84785642-84846996	chr1.85971873-86033952	chr1.87339758-87400039	28	43	6	7	G1,G2
418	chr8.30443577-30534386	chr8.27056842-27150874	chr8.30715077-30806350	28	43	6	7	G1,G2
419	chr17.63814885-63883031	chr17.67641431-67709799	chr16.63588982-63654765	28	39	6	9	G1,G2
420	chr1.94779680-94955447	chr1.96041129-96218524	chr1.97542568-97734946	28	49	7	4	G1,G2
421	chr4.173843564-174207618	chr4.177141651-177517573	chr5.164748780-165109166	32	32	8	9	G1,G2
422	chr5.150830257-150837213	chr5.153455083-153462030	chr6.147903568-147910526	32	35	8	7	G1,G2
423	chr7.64074587-64090391	chr7.64618641-64639675	chr3.60435264-60407029	33	39	8	5	G1,G2
424	chr11.131272483-131282337	chr11.131011584-131021439	chr14.129917187-129926980	30	41	8	6	G1,G2
425	chr18.4431812-4438295	chr18.12229241-12223091	chr18.9732181-9724403	30	40	8	7	G1,G2
426	chr17.42092887-42118114	chr17.11037218-11011961	chr16.56166418-56140450	2	0	19	29	G1,G2
427	chr15.41690340-41702012	chr15.40739325-40750987	chr7.22054653-22066289	3	3	22	25	G1,G2
428	chr7.153477930-153479513	chr7.154791361-154792944	chr3.191136556-191138123	3	3	21	25	G1,G2
429	chr1.204610814-204618227	chr1.186759592-186766940	chr1.163990524-163983470	4	0	21	26	G1,G2
430	chr18.66626377-66679534	chr18.67572800-67622800	chr18.64342742-64398647	4	3	21	25	G1,G2
431	chr2.163193599-163215326	chr2b.167343948-167365703	chr12.26203347-26229961	33	42	10	2	G1,G2
432	chr10.44200491-44762468	chr10.44634859-45211273	chr9.44557335-45118344	33	34	10	6	G1,G2
433	chr3.7779751-7938029	chr3.7970402-8155737	chr2.53195491-53032870	34	38	9	4	G1,G2
434	chr6.126635757-126719924	chr6.128464246-128549695	chr4.137650992-137562413	34	38	9	4	G1,G2
435	chr8.117853955-117892006	chr8.116150172-116188208	chr8.119288009-119326690	34	36	9	5	G1,G2
436	chr2.112237705-112265589	chr2a.112706610-112734312	chr13.111166777-111193808	5	2	23	23	G1,G2
437	chr9.138372925-138375310	chr9.136595632-136598020	chr15.1946750-1944405	5	4	23	22	G1,G2
438	chr4.166639018-166642925	chr4.169773587-169777475	chr5.157688065-157691554	31	40	8	5	G1,G2
439	chr19.23335855-23347070	chr19.23573655-23584932	chr19.22396734-22405877	31	33	8	9	G1,G2
440	chr2.142126535-142135707	chr2b.145959079-145968254	chr12.5158059-5167225	29	37	7	9	G1,G2
441	chr9.10381968-10601956	chr9.10607502-10832576	chr15.66658761-66447596	90	3	0	3	G1
442	chr2.115154140-115364091	chr2b.115200646-115421513	chr13.120832592-121037813	90	7	1	0	G1
443	chr9.10250691-10518372	chr9.10473708-10744839	chr15.66830433-66527071	87	3	1	3	G1
444	chr2.115044078-115264458	chr2b.115086329-115314611	chr13.120719401-120934475	90	6	1	0	G1
445	chr2.114923858-115127213	chr2b.114960839-115170210	chr13.120600299-120802128	88	6	1	1	G1
446	chr9.9810565-10234781	chr9.10012815-10453832	chr15.67289641-66847732	73	11	0	7	G1
447	chr9.10091849-10366483	chr9.10301351-10592029	chr15.67000331-66673987	84	6	1	3	G1
448	chr1.161307318-161312456	chr1.142312044-142317172	chr1.192988265-192993425	79	7	1	5	G1
449	chr9.9218898-9772416	chr9.9407394-9969619	chr15.67905552-67334378	78	10	1	4	G1
450	chr9.9429443-10019764	chr9.9621889-10227284	chr15.67692246-67070242	71	11	1	7	G1
451	chr1.70284826-70379473	chr1.71278226-71376423	chr1.72799033-72895658	76	11	1	4	G1
452	chr10.10585537-10788431	chr10.10765860-10961377	chr9.10754644-10944442	84	3	4	2	G1
453	chr9.9006774-9393042	chr9.9189647-9585187	chr15.68117764-67723328	74	7	1	7	G1
454	chr1.70261425-70363229	chr1.71254820-71360482	chr1.72775412-72880040	75	13	2	3	G1
455	chr11.124035877-124122065	chr11.123636024-123723937	chr14.122812256-122898697	75	7	2	6	G1
456	chr1.98189370-98378010	chr1.99509961-99701743	chr1.101015458-101206198	75	6	5	4	G1
457	chr4.16288509-16448429	chr4.16621815-16786395	chr5.11494450-11659712	60	9	2	13	G1
458	chr10.10682341-10937023	chr10.10862888-11113856	chr9.10850190-11095450	72	9	5	4	G1
459	chr1.98006828-98247337	chr1.99325587-99568237	chr1.100814760-101074850	65	17	4	4	G1
460	chr3.76179019-76479848	chr3.78044245-78349957	chr2.495607-802863	68	7	5	7	G1
461	chr5.73959361-73967297	chr5.41276699-41268763	chr6.70821369-70829305	69	7	5	6	G1
462	chr3.132703222-133236444	chr3.136019577-136575934	chr2.156198789-155631310	65	10	4	8	G1
463	chr1.237625957-238023723	chr1.220280159-220675778	chr1.217648011-217259893	66	7	5	8	G1
464	chr4.16368363-16674477	chr4.16704896-17001197	chr5.11575110-11878894	59	7	2	14	G1
465	chr10.10806156-11048427	chr10.10979040-11227079	chr9.10962545-11207117	66	13	4	5	G1
466	chr2.115280789-115411597	chr2b.115331480-115470081	chr13.120950259-121077158	69	18	6	0	G1
467	chr8.137069835-137895982	chr8.135730262-136544469	chr8.138518001-139322918	53	23	2	9	G1
468	chr3.76828982-77003649	chr3.78705959-78884290	chr2.1164231-1340721	65	6	4	9	G1
469	chrX.33250402-33672392	chrX.33538222-33971405	chrX.31240496-31681720	60	7	4	12	G1
470	chr10.9960057-10670041	chr10.10116421-10850610	chr9.10128958-10837876	68	5	5	7	G1
471	chr4.16196528-16361630	chr4.16528703-16698106	chr5.11403718-11568343	60	10	4	11	G1
472	chr1.237892863-238321973	chr1.220540870-220979247	chr1.217391986-216954035	70	9	7	3	G1
473	chr1.161311222-161379482	chr1.142315950-142382745	chr1.192992150-193053297	61	14	5	7	G1
474	chr11.98453145-98895476	chr11.97686638-98145601	chr14.97717485-98165056	53	13	2	14	G1
475	chr1.70222269-70278008	chr1.71215102-71271405	chr1.72738747-72791909	64	15	5	4	G1
476	chr9.10533089-12095283	chr9.10759536-12439417	chr15.66511707-64883400	60	5	4	12	G1
477	chr3.75260785-76343765	chr3.77078515-78211242	chr2.61128167-664553	62	5	6	10	G1
478	chr9.73792099-74056817	chr9.70771967-71040222	chr15.80770590-81015518	65	12	7	4	G1
479	chr3.76733541-76904899	chr3.78606171-78782723	chr2.1062102-1236032	64	6	6	8	G1
480	chr3.68325724-68604296	chr3.69980803-70264054	chr2.67971411-67695731	66	8	7	5	G1
481	chr5.59483632-60041865	chr5.55623707-55041024	chr6.57818563-58415432	52	12	3	14	G1
482	chr3.76378284-76531325	chr3.78245633-78401771	chr2.693367-853281	55	12	5	11	G1
483	chr3.76481426-76613274	chr3.78351539-78484665	chr2.804350-937458	60	7	7	9	G1
484	chr3.68269000-68390234	chr3.69923164-70046544	chr2.68028015-67907245	61	11	6	7	G1
485	chr12.73633845-73820625	chr12.75431606-75620884	chr11.71962262-72173123	57	12	6	9	G1
486	chr3.132893134-133619720	chr3.136213916-136967919	chr2.155975377-155273197	49	11	4	15	G1
487	chr11.80895645-81325618	chr11.80034475-80472740	chr14.79802512-80240650	52	19	5	9	G1
488	chr5.149994935-150009423	chr5.152610508-152625424	chr6.147108532-147123146	44	20	2	15	G1
489	chr2.199904692-200234552	chr2b.204736016-205074751	chr12.62922121-63250619	54	13	6	10	G1
490	chr3.68179414-68312278	chr3.69829310-69966731	chr2.68114895-67984800	63	7	8	6	G1
491	chr3.76538395-76673641	chr3.78408840-78546373	chr2.860647-997601	63	7	8	6	G1
492	chr5.73961174-73968032	chr5.41274885-41268028	chr6.70823183-70830040	57	12	7	8	G1
493	chr18.68233439-68591640	chr18.69221311-69596152	chr18.65945165-66299957	61	7	9	6	G1
494	chr4.16062002-16278041	chr4.16396209-16611289	chr5.11270724-11483702	52	11	6	12	G1
495	chr2.188227788-189038695	chr2b.192873812-193719191	chr12.51298225-52127089	56	14	6	8	G1
496	chrX.33433483-34555715	chrX.33722691-34904677	chrX.31426423-32628371	56	5	6	13	G1
497	chr11.98647664-99233651	chr11.97886237-98487187	chr14.97908994-98487250	49	15	4	13	G1
498	chr5.128809959-129346518	chr5.131026260-131576008	chr6.125810636-126406326	52	8	5	14	G1
499	chr3.76930673-77160417	chr3.78808393-79040733	chr2.1260789-1500492	55	4	7	13	G1
500	chr6.86776508-87023477	chr6.87194794-87439936	chr4.82011946-82279781	42	27	3	12	G1
501	chr3.179245297-179498733	chr3.183434595-183688004	chr2.108765306-108514218	44	16	4	15	G1
502	chr11.81055223-81608772	chr11.80195146-80766767	chr14.79964065-80488740	45	21	4	13	G1
503	chr1.143754231-143771106	chr1.114289281-114272614	chr1.123149740-123139623	42	31	2	11	G1
504	chr12.85336957-85611539	chr12.87221187-87536553	chr11.83453845-87811488	59	10	9	6	G1
505	chr12.73728200-73938059	chr12.75528353-75739629	chr11.72057042-72282638	58	15	9	4	G1
506	chr12.128334569-129197890	chr12.131284078-132173894	chr11.130559796-131415439	58	13	9	5	G1
507	chr5.88048099-88054014	chr5.26937717-26931810	chr6.85003457-85009375	53	16	7	8	G1
508	chr9.74016321-74158222	chr9.70999710-71142544	chr15.80976302-81110351	52	18	7	8	G1
509	chr5.88052002-88063419	chr5.26933821-26922422	chr6.85007366-85019047	53	19	6	7	G1
510	chr12.124709329-125742648	chr12.127576572-128643059	chr11.126970989-128026117	49	7	6	15	G1
511	chr14.39393924-39586625	chr14.39041922-39237607	chr7.102849258-103054067	44	23	3	13	G1
512	chr11.80606650-81021661	chr11.79737912-80161207	chr14.79500927-79930637	42	22	4	13	G1
513	chr1.70074295-70202605	chr1.71068544-71194102	chr1.72603591-72712596	52	26	6	4	G1
514	chr5.129217234-129481700	chr5.131442700-131712292	chr6.126282515-126538015	52	7	6	13	G1
515	chr21.15359899-16025682	chr21.15157855-15824522	chr3.31844835-31157682	52	10	6	12	G1
516	chr2.58065357-58154610	chr2a.59313833-59403764	chr13.58206826-58300273	1	5	31	15	G1
517	chr3.76617625-76729395	chr3.78489019-78602039	chr2.942002-1057811	54	7	8	11	G1
518	chr2.181336374-181556233	chr2b.185846944-186082595	chr12.44345502-44551493	42	27	4	12	G1
519	chr2.115473591-115713272	chr2b.115530940-115769212	chr13.121141077-121375021	51	15	6	10	G1
520	chr2.114444069-115024950	chr2b.114451175-115065845	chr13.120130051-120699723	48	15	6	12	G1
521	chr6.40464123-40528690	chr6.41327462-41392643	chr4.40213714-40278410	44	26	5	9	G1
522	chr11.124121636-124137191	chr11.123723503-123739046	chr14.122898268-122913602	55	10	9	8	G1
523	chr1.70157884-70257034	chr1.71148591-71250390	chr1.72675334-72770989	53	20	8	5	G1
524	chr2.220281937-221642125	chr2b.225663646-227036853	chr12.83567336-84942117	61	3	10	7	G1
525	chr14.95628203-95628788	chr14.96382796-96383381	chr7.159324849-159325437	38	33	2	12	G1
526	chr12.85622943-85883194	chr12.87547980-87808617	chr11.87823804-88089319	50	17	7	9	G1
527	chr2.180569953-180895307	chr2b.185050470-185395716	chr12.43629026-43939319	41	23	4	14	G1
528	chr7.13238861-13673528	chr7.13327692-13760945	chr3.112914916-112451025	57	19	10	1	G1
529	chr9.116223896-116228057	chr9.113896030-113900631	chr15.21705888-21701756	1	5	30	17	G1
530	chr1.161037735-161311076	chr1.142029502-142315804	chr1.141353059-192992004	46	7	5	17	G1
531	chr1.143766073-143784858	chr1.114277625-114258806	chr1.123144303-123125739	40	29	4	11	G1
532	chr2.199181934-199982618	chr2b.204004133-204818095	chr12.62203462-63001278	55	10	8	9	G1
533	chr3.76675333-76817014	chr3.78548064-78693739	chr2.999326-1151805	55	6	8	11	G1
534	chr5.149575306-149581817	chr5.152177695-152184242	chr6.146695120-146701878	55	7	10	8	G1
535	chr18.68422958-68861388	chr18.69418694-69876341	chr18.66132277-66562158	61	4	12	5	G1
536	chr8.16311640-16419216	chr8.12577761-12691434	chr8.16295468-16400702	36	30	2	14	G1
537	chr8.134719276-135305411	chr8.133321893-133920112	chr8.136199791-136788555	36	31	2	13	G1
538	chr3.68404609-68990339	chr3.70060924-70666562	chr2.67893195-67298538	53	8	8	10	G1
539	chr1.70366524-70385696	chr1.71363472-71382626	chr1.72883049-72901871	49	11	8	11	G1
540	chr6.54104934-54710946	chr6.55355739-55977008	chr4.53804673-54405576	50	12	8	11	G1
541	chr5.741340-750198	chr5.822483-832163	chr6.443044-454484	2	3	32	15	G1
542	chr1.239691533-239715974	chr1.222400187-222426712	chr1.215592064-215568242	2	4	32	14	G1
543	chr7.153463300-153463796	chr7.154776522-154776986	chr3.191121820-191122235	2	3	31	15	G1
544	chr5.59223134-59779836	chr5.55888659-55315757	chr6.57564019-58134827	47	14	7	13	G1
545	chr7.127830493-128160301	chr7.128855472-129134970	chr3.165932374-166056721	41	27	5	10	G1
546	chr5.73243020-73960435	chr5.42018619-41275625	chr6.70099379-70822444	49	11	8	12	G1
547	chr12.85520434-85698774	chr12.87439336-87626175	chr11.83636927-87898661	54	14	9	6	G1
548	chr7.51150033-51193101	chr7.52078720-52122298	chr3.75250146-75207103	51	23	9	3	G1
549	chr5.83716089-83944606	chr5.31247197-31015562	chr6.80591976-80831192	43	21	6	12	G1
550	chr6.86533258-86889896	chr6.86957034-87304619	chr4.81823248-82135577	43	22	6	11	G1
551	chr12.93662806-93720751	chr12.95719858-95782547	chr11.95970668-96028688	37	31	3	12	G1
552	chr17.19283736-19296282	chr17.36852932-36843007	chr16.18995660-19005626	37	28	4	13	G1
553	chr1.224857008-224862957	chr1.207251004-207256960	chr1.143759843-143753871	50	12	8	10	G1
554	chr5.149580740-149587951	chr5.152183160-152190426	chr6.146700799-146707955	57	5	12	7	G1
555	chr11.79004732-79716598	chr11.78084939-78822089	chr14.77830378-78580702	39	20	5	15	G1
556	chr8.89676567-89929126	chr8.87357761-87608208	chr8.91253267-91492432	39	24	4	13	G1
557	chr9.138081940-138092630	chr9.136152710-136164274	chr15.2263267-2252604	0	4	26	21	G1
558	chr3.79150855-79591672	chr3.81085008-81554683	chr2.3447258-3886348	47	18	7	10	G1
559	chr5.83479142-83636651	chr5.31490186-31325443	chr6.80346188-80508189	37	28	5	12	G1
560	chr10.10949698-11089658	chr10.11126552-11269880	chr9.11108659-11248580	49	10	8	12	G1
561	chr4.141292480-141293865	chr4.143910403-143911988	chr5.132612151-132613535	1	12	25	18	G1
562	chr11.80093690-80568403	chr11.79209573-79699729	chr14.78975168-79464128	40	17	6	15	G1
563	chr5.83542242-83687366	chr5.31423822-31276455	chr6.80411956-80564143	36	31	5	11	G1
564	chr16.2105739-2125794	chr16.2212861-2232923	chr20.2108997-2129709	2	11	28	15	G1
565	chr11.46353689-46354214	chr11.46893092-46893617	chr14.25751450-25750926	2	8	28	16	G1
566	chr3.67987824-68248698	chr3.69629227-69902944	chr2.68308223-68052580	54	6	11	8	G1
567	chr18.66333524-66364321	chr18.67286098-67320081	chr18.64080353-64111352	44	27	8	6	G1
568	chr2.8450496-8733361	chr2a.8574503-8850445	chr13.8477896-8760926	45	29	9	3	G1
569	chr12.16593887-16612334	chr12.17012419-17030949	chr11.16963042-16981601	45	11	9	12	G1
570	chr5.88054328-88083573	chr5.26931498-26902877	chr6.85009693-85037735	46	17	9	9	G1
571	chr8.97575153-97579227	chr8.95369042-95373462	chr8.99062426-99066483	2	11	27	16	G1
572	chr12.1479062-1511608	chr12.1563314-1599513	chr11.1547461-1587088	2	5	27	19	G1
573	chr6.26232548-26233377	chr6.26616845-26617674	chr4.26116033-26116858	2	10	26	17	G1
574	chr22.40172588-40183492	chr22.40485222-40494840	chr10.85403042-85414613	2	14	26	15	G1
575	chr5.24527657-24536342	chr5.91485307-91475566	chr6.24506672-24515270	43	25	7	8	G1
576	chr22.17891268-17944122	chr22.17970836-18028400	chr10.63572362-63624449	0	9	23	22	G1
577	chr9.78235680-78330792	chr9.75299486-75397481	chr15.85184195-85271492	40	21	6	13	G1
578	chr9.116219705-116226432	chr9.113891832-113898565	chr15.21710413-21703361	2	3	29	17	G1
579	chr12.93724919-93830250	chr12.95786704-95895526	chr11.96032562-96139464	37	27	5	12	G1
580	chr2.163229263-163258197	chr2b.167379639-167408694	chr12.26244233-26273542	47	29	9	2	G1
581	chrX.103722276-105065856	chrX.104115777-105476476	chrX.103204079-104643392	46	15	10	9	G1
582	chr5.65826454-66275610	chr5.49167596-48701983	chr6.64398498-64851070	42	24	7	9	G1
583	chr6.73422212-73478546	chr6.73446263-73503563	chr4.68907642-68964004	41	19	8	12	G1
584	chr8.135415305-135581395	chr8.134029673-134193187	chr8.136894330-137058037	41	20	8	11	G1
585	chr1.231882477-232111010	chr1.214354066-214584171	chr1.223305487-223096616	36	28	5	12	G1
586	chr4.19934650-20231069	chr4.20313106-20618963	chr5.15107162-15404357	36	25	6	13	G1
587	chr5.37859508-37876874	chr5.77837067-77819593	chr6.37665679-37682974	2	8	25	19	G1
588	chr11.123006363-123008515	chr11.122594347-122596495	chr14.121988797-121990944	50	15	11	5	G1
589	chr11.79746314-80292221	chr11.78851713-79414343	chr14.78611034-79177033	43	19	8	10	G1
590	chr17.32071535-32322312	chr17.20788524-20529129	chr16.46621698-46878378	43	20	8	9	G1
591	chr4.187477012-187746191	chr4.191027424-191292612	chr5.178445321-178698544	43	29	9	5	G1
592	chr3.158461317-159296894	chr3.162268016-163126159	chr2.130391498-129578225	38	26	6	11	G1
593	chr2.75918108-76909098	chr2a.77483322-78485777	chr13.76151706-77151279	45	12	9	11	G1
594	chr5.149581967-149603138	chr5.152184392-152205645	chr6.146702028-146722977	45	10	10	12	G1
595	chr6.116708309-116777707	chr6.118253567-118325051	chr4.147653096-147584799	44	28	10	3	G1
596	chr7.13490322-13891606	chr7.13576110-13980564	chr3.112661155-112247442	44	19	10	8	G1
597	chr12.85708558-86148354	chr12.87635858-88073291	chr11.87919788-88393796	41	27	7	8	G1
598	chr11.46357202-46358231	chr11.46896578-46897607	chr14.25747935-25746907	0	4	21	26	G1
599	chr2.77027536-77082993	chr2a.78604957-78668988	chr13.77272638-77328313	42	12	8	14	G1
600	chr2.78171913-79450131	chr2a.79781970-81106138	chr13.78458993-79776255	42	26	8	7	G1
601	chr4.15896167-16190362	chr4.16226860-16522542	chr5.11102289-11397612	42	24	8	8	G1
602	chr1.68460898-69852196	chr1.69431476-70839381	chr1.71015270-72373280	42	9	9	15	G1
603	chr2.221057897-221991904	chr2b.226448692-227387559	chr12.84347016-85288520	42	11	8	14	G1
604	chr4.22951862-23404340	chr4.23423446-23888358	chr5.18096147-18549798	42	11	8	14	G1
605	chr14.73950752-74031426	chr14.74134545-74217853	chr7.137529285-137604283	2	6	27	18	G1
606	chr14.78813945-78815657	chr14.79121263-79122975	chr7.142475876-142477578	2	8	24	20	G1
607	chr2.77058823-77112679	chr2a.78643360-78699461	chr13.77304953-77357163	44	11	10	12	G1
608	chr21.27293245-28041135	chr21.26818702-27571610	chr3.19666875-18894011	37	22	6	14	G1
609	chr5.88214661-88446794	chr5.26770905-26533325	chr6.85167773-85399432	39	20	8	12	G1
610	chr19.57934944-58004500	chr19.58417953-58491903	chr19.58717738-58769411	34	29	6	12	G1
611	chr8.62887243-63373705	chr8.59947262-60507971	chr8.64360304-64862596	41	9	8	16	G1
612	chr9.3515843-3622725	chr9.3564581-3672969	chr15.73709233-73583560	41	23	8	9	G1
613	chr9.113837211-114014098	chr9.111491541-111673280	chr15.24076892-23898906	41	29	8	6	G1
614	chr16.14262939-14266484	chr16.14688229-14691779	chr20.14372856-14376417	41	15	8	13	G1
615	chr5.24524460-24532448	chr5.91488988-91479452	chr6.24503447-24511485	40	27	9	7	G1
616	chr5.24532969-24543940	chr5.91478932-91467954	chr6.24512015-24522971	40	27	9	7	G1
617	chr18.38757052-38773928	chr18.39043497-39060365	chr18.35918272-35935022	40	27	9	7	G1
618	chr6.137017919-137033051	chr6.139003644-139018722	chr4.127178863-127163705	42	25	8	8	G1
619	chr2.75784901-76572219	chr2a.77349907-78141920	chr13.76016019-76831233	41	19	9	10	G1
620	chr6.84816577-84905495	chr6.85219076-85311201	chr4.80085418-80169972	41	22	9	9	G1
621	chr18.45594737-46007761	chr18.46050747-46475618	chr18.42857890-43310315	41	30	9	5	G1
622	chrX.44929261-45701976	chrX.45482836-46270939	chrX.42944804-43774754	43	15	9	11	G1
623	chr11.46356627-46357985	chr11.46896030-46897361	chr14.25748505-25747153	1	7	19	26	G1
624	chr7.143191121-143204067	chr7.144446970-144461385	chr3.181245572-181259542	1	3	20	28	G1
625	chr11.124295457-124296271	chr11.123901201-123901997	chr14.123061289-123062084	1	14	20	22	G1
626	chr7.31941463-31998265	chr7.32290414-32353041	chr3.94287082-94231755	36	25	7	12	G1
627	chr1.97365372-97786061	chr1.98672493-99096187	chr1.100184294-100596373	44	23	11	5	G1
628	chr12.85227631-85514470	chr12.87111863-87433402	chr11.83339969-83631027	45	15	10	9	G1
629	chr11.124296024-124297809	chr11.123901750-123903535	chr14.123061836-123063617	2	10	23	20	G1
630	chr12.90656201-90723640	chr12.92628031-92705044	chr11.92934929-93005522	2	10	22	21	G1
631	chr3.27097927-27389978	chr3.27713843-28005422	chr2.169478477-169780563	38	17	8	14	G1
632	chr18.53431873-53605940	chr18.54057750-54238569	chr18.50869266-51045855	38	25	8	10	G1
633	chr2.66797538-66806282	chr2a.68182300-68191042	chr13.66996942-67010341	39	25	9	8	G1
634	chr7.38992101-39573291	chr7.39476349-40081864	chr3.87272875-86680162	39	15	9	13	G1
635	chr2.40505245-40509644	chr2a.41366820-41371219	chr13.40436056-40440450	33	31	6	12	G1
636	chr4.22116065-23342962	chr4.22563101-23826414	chr5.17289109-18491018	42	11	9	13	G1
637	chr2.162949475-162991571	chr2b.167098097-167140215	chr12.25957438-25999797	44	31	11	1	G1
638	chr3.15665034-15677279	chr3.16029574-16041849	chr2.157984358-157996455	44	31	11	1	G1
639	chr12.11153411-11183524	chr12.11493686-11523778	chr11.11468448-11572380	44	29	10	2	G1
640	chr18.38761317-38786069	chr18.39047767-39073789	chr18.35922540-35947355	35	25	7	13	G1
641	chr4.173176116-173294348	chr4.176472936-176591369	chr5.164089014-164210625	36	26	6	12	G1
642	chr11.123005290-123007032	chr11.122593274-122595015	chr14.121987706-121989482	48	11	13	7	G1
643	chr8.145241272-145266811	chr8.144095238-144124756	chr8.146728777-146755569	2	5	25	21	G1
644	chr2.58127467-58206775	chr2a.59375637-59453870	chr13.58272133-58344211	1	6	18	28	G1
645	chr11.2368229-2371918	chr11.2432925-2437070	chr14.2398839-2402544	1	15	18	23	G1
646	chr18.17235193-17286720	chr18.17151823-17203561	chr18.14396868-14446747	1	7	18	27	G1
647	chr2.241608983-241618948	chr2b.247413208-247423198	chr12.104925168-104935127	0	7	19	27	G1
648	chr16.25688135-25970473	chr16.26143913-26426840	chr20.24238530-24521003	37	20	8	13	G1
649	chr8.136602665-136646843	chr8.135242283-135298110	chr8.138072503-138114632	37	27	7	10	G1
650	chr5.24618400-24626338	chr5.91391260-91382604	chr6.24599704-24607670	36	25	8	11	G1
651	chr11.79376761-80042488	chr11.78461090-79155527	chr14.78220159-78924037	36	19	8	14	G1
652	chr19.43263983-43264996	chr19.43625864-43626865	chr19.44403130-44404152	2	15	22	19	G1
653	chr5.37837468-37870595	chr5.77861093-77825950	chr6.37643210-37676701	2	7	22	23	G1
654	chr21.45787738-45858180	chr21.45201563-45273909	chr3.1186581-1118781	2	6	22	24	G1
655	chr12.125288180-126506945	chr12.128166527-129413938	chr11.127563695-128761333	39	24	8	9	G1
656	chr5.24667508-24677005	chr5.91339394-91330050	chr6.24651013-24660302	39	31	8	6	G1
657	chr5.149569186-149580589	chr5.152171567-152183009	chr6.146689044-146700648	39	13	8	15	G1
658	chr1.97583006-97979737	chr1.98889078-99294063	chr1.100399313-100786874	39	24	8	10	G1
659	chr14.37048123-37720299	chr14.36647292-37334392	chr7.100496360-101152221	41	18	10	10	G1
660	chr2.77311571-77350502	chr2a.78902621-78938689	chr13.77544156-77586154	41	13	9	13	G1
661	chr2.163025315-163068418	chr2b.167174774-167217929	chr12.26034637-26085696	43	33	10	1	G1
662	chr7.105304124-105318035	chr7.105818297-105833064	chr3.143295603-143309174	43	24	11	5	G1
663	chr7.51315081-51907800	chr7.52243755-52851846	chr3.75088846-74539834	44	27	12	2	G1
664	chr5.149607355-149649436	chr5.152211146-152256434	chr6.146727211-146768761	47	9	12	9	G1
665	chr3.160781757-160961711	chr3.164645687-164822838	chr2.128140949-127961165	49	15	13	4	G1
666	chr2.241600349-241618407	chr2b.247404381-247422660	chr12.104916674-104934558	2	5	24	22	G1
667	chr8.91164114-91164231	chr8.88877032-88877149	chr8.92724637-92724756	2	12	24	19	G1
668	chr7.82223379-82224895	chr7.82216590-82218094	chr3.134503677-134502207	39	22	8	11	G1
669	chr12.47676952-47690244	chr12.40744818-40731314	chr11.46124122-46137683	39	14	8	15	G1
670	chr21.32806282-32878309	chr21.32259613-32332426	chr3.13998060-13929032	38	27	9	8	G1
671	chr14.99166837-99217570	chr14.100008995-100059399	chr7.162897502-162942731	37	21	9	11	G1
672	chr1.236065485-236311271	chr1.218689512-218943464	chr1.219208284-218940634	38	19	8	12	G1
673	chr6.100089987-100097902	chr6.101148624-101156528	chr4.95475409-95482985	38	26	8	9	G1
674	chr2.58163849-58236519	chr2a.59413911-59483868	chr13.58306040-58370404	1	4	18	29	G1
675	chr10.20476723-20577642	chr10.20634797-20740949	chr9.20437617-20535384	40	15	10	12	G1
676	chr16.14265094-14323655	chr16.14690389-14752071	chr20.14375025-14433689	40	16	10	11	G1
677	chr12.91021200-91037452	chr12.93009001-93026601	chr11.93322201-93338913	39	25	10	7	G1
678	chr14.85090569-85157863	chr14.85555915-85629143	chr7.148829734-148892963	39	19	10	10	G1
679	chr3.24187576-24352666	chr3.24760548-24929368	chr2.166628267-166781561	40	18	9	11	G1
680	chr15.79372549-79375743	chr15.79272077-79275538	chr7.60449359-60452859	40	23	9	8	G1
681	chr4.102486990-102487184	chr4.104628871-104629059	chr5.94315227-94315406	2	7	21	24	G1
682	chr7.73247552-73248035	chr7.73790087-73790570	chr3.51642127-51642617	2	7	21	24	G1
683	chr16.1955190-1965528	chr16.2058218-2068652	chr20.1950605-1958270	2	11	21	23	G1
684	chr18.66520996-66575703	chr18.67471932-67520333	chr18.64266213-64300846	2	5	21	25	G1
685	chr12.13592442-13597553	chr12.13965388-13970489	chr11.13915769-13920816	42	18	10	9	G1
686	chr7.51119532-51165027	chr7.52049619-52093999	chr3.75281510-75235286	46	22	13	3	G1
687	chr8.111053737-112030823	chr8.109173708-110183567	chr8.112374351-113409157	46	7	13	10	G1
688	chr4.119298822-119308663	chr4.121730500-121740815	chr5.111008776-111015477	4	4	26	19	G1
689	chr13.21911264-22093795	chr13.21987313-22173674	chr17.3042270-3214786	4	4	26	19	G1
690	chr2.141870062-141889473	chr2b.145692721-145713260	chr12.4903425-4921682	34	29	6	12	G1
691	chr2.142263453-142271481	chr2b.146098629-146108562	chr12.5303705-5311693	35	27	7	11	G1
692	chr2.224171138-224441201	chr2b.229606342-229881939	chr12.87465313-87744941	35	28	8	10	G1
693	chr5.88204113-88265468	chr5.26781458-26718194	chr6.85157235-85219788	35	24	8	12	G1
694	chr1.97824322-98162134	chr1.99135708-99481716	chr1.100632030-100988024	37	28	8	8	G1
695	chr11.11339485-11349938	chr11.11326964-11337413	chr14.60568424-60553019	37	27	8	9	G1
696	chrX.106261856-106694784	chrX.106651556-107071439	chrX.105871304-106277743	37	28	8	8	G1
697	chr3.181177831-181246505	chr3.185385371-185455150	chr2.106787542-106725891	37	21	8	12	G1
698	chr8.67573016-67642336	chr8.64762765-64834491	chr8.69128609-69199512	37	19	8	13	G1
699	chr5.88064546-88104911	chr5.26921295-26880859	chr6.85020173-85058987	38	16	8	14	G1
700	chr6.40012213-40499537	chr6.40836783-41363550	chr4.39771214-40248904	38	20	8	12	G1
701	chr12.48807278-48813596	chr12.39568045-39561738	chr11.47255609-47262526	38	27	8	9	G1
702	chr21.27272853-27402766	chr21.26798311-26927735	chr3.19686445-19558638	38	27	8	9	G1
703	chr16.75912558-75927859	chr16.77329764-77346686	chr20.75485348-75500143	39	28	10	6	G1
704	chr9.138375506-138392955	chr9.136598216-136615913	chr15.1944215-1926026	2	8	23	21	G1
705	chr14.76297652-76298962	chr14.76535740-76537034	chr7.139919329-139920637	2	8	23	21	G1
706	chr18.32346464-32416484	chr18.32516203-32588894	chr18.29441251-29510429	2	10	23	20	G1
707	chr9.135433467-135525577	chr9.133672461-133768341	chr15.4963820-4867643	42	32	10	2	G1
708	chr2.115642341-115821364	chr2b.115698426-115883678	chr13.121303263-121480535	41	13	10	12	G1
709	chr7.2457571-2523646	chr7.2381603-2449624	chr3.40455342-40524549	41	29	10	4	G1
710	chr3.198790745-198810340	chr3.203246015-203265722	chr2.187827550-187808924	44	24	11	4	G1
711	chr2.20510927-20511056	chr2a.20843369-20843498	chr13.20374076-20374205	2	19	20	19	G1
712	chr5.132188412-132189611	chr5.134453785-134455747	chr6.129231893-129233089	2	11	20	23	G1
713	chrX.74741546-74776425	chrX.74977963-75011160	chrX.74615708-74646245	2	4	20	26	G1
714	chr7.890783-927333	chr7.763395-783749	chr3.38812253-38850739	4	5	24	21	G1
715	chr19.54302995-54303503	chr19.54822294-54822802	chr19.55382517-55383025	4	4	24	21	G1
716	chr1.226715566-226736489	chr1.209090393-209111636	chr1.141923274-141903152	4	7	25	19	G1
717	chr3.36838087-36844123	chr3.37665802-37671833	chr2.99731671-99725628	3	4	25	21	G1
718	chr2.47251347-47254657	chr2a.48295945-48299491	chr13.47282604-47285920	34	28	8	11	G1
719	chr7.99596138-99636912	chr7.100014508-100056642	chr3.47454362-47498055	34	26	8	12	G1
720	chr2.222057950-222103158	chr2b.227455132-227500276	chr12.85353842-85399512	34	25	8	12	G1
721	chr8.63443748-63664876	chr8.60579884-60806357	chr8.64923125-65150118	36	18	8	14	G1
722	chr18.1060277-1352952	chr18.15722547-15422513	chr18.13057307-12770085	38	21	10	10	G1
723	chr12.13598157-13602193	chr12.13971098-13975136	chr11.13921402-13925382	38	15	9	13	G1
724	chr2.3449507-3460635	chr2a.5059542-5070821	chr13.4976530-4989320	37	22	10	10	G1
725	chr14.95624722-95625415	chr14.96379352-96380048	chr7.159321357-159322072	37	31	10	6	G1
726	chr16.14253247-14264743	chr16.14678551-14690038	chr20.14361006-14374666	37	15	10	14	G1
727	chr3.140657970-140728303	chr3.144111896-144182905	chr2.148368797-148293862	40	27	10	5	G1
728	chr11.71966953-72079441	chr11.70895488-71010615	chr14.70662802-70777885	40	6	10	16	G1
729	chr12.13600066-13606708	chr12.13973006-13979674	chr11.13923277-13929910	40	19	10	9	G1
730	chr14.85119457-85163917	chr14.85584965-85635198	chr7.148858796-148899017	40	13	11	12	G1
731	chr11.132463580-132563240	chr11.132219545-132323413	chr14.131097072-131200521	39	10	11	14	G1
732	chr4.144696044-145606159	chr4.147373753-148494925	chr5.135972892-136639526	44	15	13	7	G1
733	chr5.143759967-144275226	chr5.146216845-146780973	chr6.140827441-141342726	44	10	13	10	G1
734	chr2.116216087-116318539	chr2b.116283145-116376696	chr13.121892268-121989791	44	12	12	9	G1
735	chr6.53885695-54187126	chr6.55131961-55439965	chr4.53546557-53899955	44	15	13	7	G1
736	chr4.86155737-86665807	chr4.45275516-88423927	chr5.44498553-78483736	42	25	12	4	G1
737	chr5.145928281-145949913	chr5.148482353-148503991	chr6.143036960-143065128	42	24	12	5	G1
738	chr1.65464701-65466354	chr1.66372886-66374535	chr1.68019227-68020881	0	0	13	36	G1
739	chr16.47872768-47872959	chr16.48562608-48562801	chr20.47477821-47478012	2	18	22	18	G1
740	chr11.123007196-123009743	chr11.122595179-122597724	chr14.121989640-121992160	49	12	16	3	G1
741	chr5.143695730-143836496	chr5.146152450-146296827	chr6.140767832-140904662	47	7	14	8	G1
742	chr1.221601722-221959756	chr1.204121081-204460026	chr1.146887722-146626018	2	6	18	27	G1
743	chr5.41226626-41343497	chr5.74401006-74288414	chr6.41058999-41179967	2	9	19	25	G1
744	chr16.66434149-66442977	chr16.67601087-67609901	chr20.66172920-66182165	2	13	19	23	G1
745	chr7.103417014-103417190	chr7.103886159-103886329	chr3.141368042-141368214	2	18	19	20	G1
746	chr8.32802071-32990888	chr8.29476603-29666772	chr8.33114721-33308704	34	27	7	12	G1
747	chr12.38436324-38443950	chr12.50119955-50111044	chr11.36618341-36626430	34	28	7	11	G1
748	chr2.201733835-201740666	chr2b.206623659-206630640	chr12.64911073-64917044	35	30	9	8	G1
749	chr15.86212361-86215083	chr15.85568110-85570835	chr7.67481728-67484447	35	20	8	13	G1
750	chr3.125640754-125684385	chr3.128820195-128864252	chr2.44442622-44485785	43	11	13	10	G1
751	chr17.32217034-32342149	chr17.20638417-20508209	chr16.46769744-46898764	42	16	13	7	G1
752	chr2.101291117-101682343	chr2a.102356165-102755484	chr13.101250804-101656816	43	11	13	9	G1
753	chr5.149588005-149613224	chr5.152190480-152217440	chr6.146708009-146732520	44	11	12	10	G1
754	chr5.163992773-165393784	chr5.166814008-168250949	chr6.160995321-162404891	43	13	13	8	G1
755	chr12.16616743-16650030	chr12.17035364-17070041	chr11.16985886-17019382	44	15	12	8	G1
756	chr12.15544713-15654926	chr12.15946416-16057289	chr11.15889201-15999906	43	23	12	4	G1
757	chr3.49728548-49730973	chr3.50892419-50894844	chr2.86702758-86700330	4	6	23	21	G1
758	chr11.65415226-65423317	chr11.64340505-64348617	chr14.8562005-8552541	4	8	23	20	G1
759	chr16.2677880-2697572	chr16.2799555-2819410	chr20.2829818-2846392	4	10	23	19	G1
760	chr3.140631936-140681730	chr3.144085696-144135649	chr2.148394919-148344513	42	32	11	1	G1
761	chr2.77285061-77336336	chr2a.78872652-78924114	chr13.77523545-77571286	41	12	12	11	G1
762	chr1.143644201-143648757	chr1.114406250-114401677	chr1.123267535-123262699	36	24	10	9	G1
763	chr4.15856649-15893683	chr4.16185915-16224376	chr5.11063434-11099700	37	31	9	6	G1
764	chr2.77363217-77402704	chr2a.78951397-78992955	chr13.77599177-77663646	39	12	11	13	G1
765	chr17.64824573-64828301	chr17.68682028-68685765	chr16.64566373-64570195	39	31	11	4	G1
766	chr15.47743619-47792564	chr15.46934391-46980117	chr7.27994828-28041394	1	3	15	32	G1
767	chr6.34105947-34108269	chr6.34753621-34755943	chr4.33728220-33730476	2	11	21	22	G1
768	chr22.18633186-18634635	chr22.18750614-18752064	chr10.64339603-64341056	2	5	21	25	G1
769	chr15.32563784-32659975	chr15.31353031-31427046	chr7.12716872-12824957	2	4	21	25	G1
770	chrX.52879351-52953556	chrX.53048510-53326078	chrX.51177984-51245665	2	6	21	24	G1
771	chr12.16595281-16636723	chr12.17013805-17056071	chr11.16964431-17006327	46	10	14	7	G1
772	chr12.47637454-47683035	chr12.40786375-40738524	chr11.46083389-46130568	42	7	13	12	G1
773	chr6.137094190-137125839	chr6.139081545-139113789	chr4.127102565-127065424	33	29	7	11	G1
774	chr1.99502690-99544043	chr1.100836504-100877863	chr1.102347228-102388475	40	17	12	9	G1
775	chr1.14550813-14795522	chr1.14517743-14775475	chr1.16991937-17228986	40	33	11	2	G1
776	chr1.233780149-233879470	chr1.216368810-216478822	chr1.221453468-221361352	40	30	11	3	G1
777	chr2.163364172-163382224	chr2b.167515398-167539848	chr12.26374839-26392042	40	34	11	1	G1
778	chr4.140548986-140582615	chr4.143147971-143180995	chr5.131878562-131910723	40	16	11	10	G1
779	chr8.40296683-41010617	chr8.37037003-37770463	chr8.40869036-41590374	41	7	11	14	G1
780	chr15.50630581-50631293	chr15.49880582-49881294	chr7.30852511-30853224	41	19	11	8	G1
781	chr9.14631010-14636646	chr9.15017240-15022835	chr15.62265008-62259447	39	29	10	5	G1
782	chr16.65534088-65648693	chr16.66648971-66789262	chr20.65235522-65353522	39	33	10	3	G1
783	chr12.16499857-16595016	chr12.16916843-17013540	chr11.16869139-16964166	38	16	10	12	G1
784	chr4.14782562-15003368	chr4.15108197-15329157	chr5.9976409-10184222	38	27	11	6	G1
785	chr5.24589621-24608919	chr5.91421613-91401718	chr6.24568200-24587288	38	29	11	5	G1
786	chr6.94424749-95542247	chr6.95020829-96160402	chr4.89584809-90671330	38	15	11	12	G1
787	chr6.116746078-116836163	chr6.118293379-118383607	chr4.147613757-147524978	38	31	11	4	G1
788	chr1.142727297-143578898	chr1.186699562-114473537	chr1.164047698-123331533	34	28	8	10	G1
789	chr1.14023803-14147425	chr1.13973261-14096443	chr1.16463139-16582143	34	23	8	12	G1
790	chr5.150661783-150811344	chr5.153289271-153435667	chr6.147717086-147882145	34	29	8	9	G1
791	chr18.28072904-28117958	chr18.28151738-28197475	chr18.25161448-25205676	34	23	8	12	G1
792	chr5.24677194-25279866	chr5.91329861-90729521	chr6.24660491-25265930	34	29	9	9	G1
793	chr9.23680657-23684275	chr9.24227169-24230787	chr15.53371073-53367462	34	24	9	12	G1
794	chr17.41581004-41586547	chr17.11341582-11336026	chr16.56774763-56780574	34	24	9	12	G1
795	chr1.20681958-20682412	chr1.20588795-20589235	chr1.23139124-23139582	36	17	10	13	G1
796	chr4.184284162-184419161	chr4.187778299-187915227	chr5.175230122-175366850	36	27	10	8	G1
797	chr1.14093915-14237391	chr1.14042901-14195949	chr1.16531253-16673575	36	31	9	6	G1
798	chr1.87571785-87587566	chr1.88786808-88802626	chr1.90034684-90050493	36	23	9	10	G1
799	chr3.140692500-140764488	chr3.144146680-144218745	chr2.148334612-148257698	36	26	9	9	G1
800	chr4.185622708-185786405	chr4.189129881-189295787	chr5.176575817-176727710	36	15	9	14	G1
801	chr9.7023817-7034382	chr9.7157970-7168870	chr15.70113787-70103086	36	17	9	13	G1
802	chr14.55676487-55698306	chr14.55429621-55451989	chr7.119173933-119195989	36	26	9	9	G1
803	chr16.86301785-86356739	chr16.88070146-88132859	chr20.85848531-85900931	36	25	9	10	G1
804	chr4.21026308-21027618	chr4.21425096-21426406	chr5.16194856-16196164	4	8	23	21	G1
805	chr8.104581706-104582379	chr8.102534358-102535031	chr8.106017441-106018115	4	11	23	19	G1
806	chr12.88626529-88628005	chr12.90557513-90558993	chr11.90858180-90859730	4	11	23	19	G1
807	chr16.47873061-47873543	chr16.48562885-48563862	chr20.47478096-47478578	4	9	23	20	G1
808	chr22.24289079-24311607	chr22.24337340-24361430	chr10.69384387-69407472	4	11	23	19	G1
809	chr3.95632599-97240480	chr3.98187457-99846652	chr2.14895292-16453473	3	8	23	20	G1
810	chr18.72282768-72299384	chr18.73351521-73369145	chr18.69907390-69924535	3	9	23	20	G1
811	chr1.204579195-204584242	chr1.186727921-186732978	chr1.164021624-164016613	4	7	22	22	G1
812	chr3.49696292-49699090	chr3.50860152-50863508	chr2.86737399-86734609	4	6	22	22	G1
813	chr5.168658860-168951075	chr5.171553169-171848574	chr6.165689730-165979572	4	9	22	21	G1
814	chr16.69062595-69071015	chr16.70313103-70321527	chr20.72173562-72165164	4	12	22	19	G1
815	chr6.29053393-29053470	chr6.29490688-29490765	chr4.28698047-28698124	2	12	17	26	G1
816	chr1.153850513-153891593	chr1.134789435-134822053	chr1.134192401-134220017	1	2	15	33	G1
817	chr1.42957192-42988159	chr1.43415160-43446969	chr1.45613221-45644463	1	6	14	32	G1
818	chr1.65465897-65467223	chr1.66374078-66375409	chr1.68020422-68021732	0	5	16	31	G1
819	chr3.12310119-12399340	chr3.12615927-12704932	chr2.48770904-48680334	42	27	12	3	G1
820	chr1.224803068-224860057	chr1.207195387-207254062	chr1.143817689-143756766	41	7	13	12	G1
821	chr3.125614917-125658170	chr3.128795085-128838091	chr2.44414046-44460226	41	14	13	9	G1
822	chr16.49228021-49246031	chr16.49937201-49954819	chr20.48858705-48876304	40	27	13	3	G1
823	chr4.86413640-86866569	chr4.88163353-88624458	chr5.78220969-78671507	39	18	12	9	G1
824	chr11.71818080-71993849	chr11.70744435-70923291	chr14.70508924-70691344	39	7	12	15	G1
825	chr12.13603107-13608787	chr12.13976049-13981758	chr11.13926283-13931991	39	15	11	11	G1
826	chr12.19815643-20405170	chr12.20314847-20914379	chr11.20183738-20782102	39	31	11	3	G1
827	chr3.166396562-167023152	chr3.170332588-170961377	chr2.122178191-121532522	36	12	11	14	G1
828	chr7.37973503-38178272	chr7.38439358-38650469	chr3.88283323-88068777	36	27	11	7	G1
829	chr2.78697365-79597298	chr2a.80342783-81254459	chr13.79009986-79912814	37	11	11	14	G1
830	chr5.24544392-24562196	chr5.91467508-91449027	chr6.24523434-24540409	37	28	11	6	G1
831	chr4.109974760-110565084	chr4.112260969-112864790	chr5.101743903-102359042	37	27	10	7	G1
832	chr8.67523444-67591194	chr8.64710550-64783372	chr8.69073146-69147380	37	23	10	9	G1
833	chr11.29256083-30302957	chr11.29436258-30506795	chr14.42487069-41449172	37	15	10	13	G1
834	chr4.166452124-166477906	chr4.169577216-169609136	chr5.157487734-157518501	34	20	10	12	G1
835	chr6.146238844-146250138	chr6.148429667-148441024	chr4.117532762-117511889	34	31	10	7	G1
836	chr8.2802631-2843026	chr8.2883468-2925199	chr8.3019189-3059771	34	27	10	9	G1
837	chr12.68895818-68902753	chr12.70538914-70545848	chr11.67159973-67167348	34	24	10	10	G1
838	chr2.55105928-55106342	chr2a.56326590-56327004	chr13.55320205-55320619	35	31	10	7	G1
839	chr5.90142560-90262273	chr5.24801649-24671040	chr6.87050322-87159671	35	30	10	7	G1
840	chr15.43236539-43239094	chr15.42329541-42332795	chr7.23509782-23512336	35	18	10	13	G1
841	chr18.38685074-38690210	chr18.38969841-38974960	chr18.35842466-35847543	35	30	10	7	G1
842	chrX.18556542-18559804	chrX.18664378-18667640	chrX.16380940-16384202	35	18	10	13	G1
843	chr5.24474286-24527591	chr5.91539311-91485373	chr6.24453470-24506606	33	30	9	9	G1
844	chr16.47925791-47927423	chr16.48616947-48618583	chr20.47531891-47533856	33	26	9	11	G1
845	chr2.12906840-13990989	chr2a.13092071-14205349	chr13.12894019-13913831	34	30	8	10	G1
846	chr2.39853466-39963411	chr2a.40664572-40809759	chr13.39762004-39902266	34	25	8	12	G1
847	chr9.6857216-6871862	chr9.6990007-7005756	chr15.70280082-70265770	34	29	8	10	G1
848	chr1.1943501-1944847	chr1.1900004-1901406	chr1.5062715-5064042	2	22	20	17	G1
849	chr5.132188948-132190789	chr5.134454321-134456925	chr6.129232426-129234268	2	11	20	22	G1
850	chr16.66423726-66434691	chr16.67590391-67601620	chr20.66161464-66173447	2	16	20	20	G1
851	chr17.7991476-7994084	chr17.48364879-48362286	chr16.7907406-7909987	2	11	20	23	G1
852	chr19.8453689-8456873	chr19.8721205-8725932	chr19.8470681-8473907	2	9	20	24	G1
853	chr22.18611817-18620298	chr22.18727603-18737711	chr10.64317493-64326177	2	7	20	25	G1
854	chr1.64052678-64066128	chr1.64955331-64969646	chr1.66591014-66604484	46	16	15	3	G1
855	chr7.12729524-13464726	chr7.12801700-13550354	chr3.113451595-112688353	44	14	14	6	G1
856	chr5.143644715-143746638	chr5.146101274-146203845	chr6.140716410-140815438	44	5	15	10	G1
857	chr1.148038399-148116227	chr1.128818806-128875758	chr1.128173655-128234568	3	7	23	22	G1
858	chr6.152510884-152511118	chr6.154930221-154930455	chr4.110934540-110934306	3	11	22	20	G1
859	chr2.159017467-159023031	chr2b.163093446-163099592	chr12.22030420-22035866	3	12	22	20	G1
860	chr4.152860735-152886665	chr4.155853565-155880071	chr5.143944599-143968486	4	5	22	24	G1
861	chr5.139474116-139474489	chr5.141862029-141862402	chr6.136531165-136531538	4	11	22	21	G1
862	chr8.74479905-74530157	chr8.71840441-71891285	chr8.75906444-75956408	4	11	22	20	G1
863	chr10.3155625-3158326	chr10.3227539-3230237	chr9.3392966-3395597	3	5	22	23	G1
864	chr11.85462351-85506644	chr11.84692112-84733976	chr14.84405695-84445228	4	5	22	24	G1
865	chr17.28642400-28658356	chr17.23927900-23911735	chr16.28612379-28628060	4	9	22	22	G1
866	chr17.33954966-33956453	chr17.19027020-19025534	chr16.48562850-48564333	3	9	22	21	G1
867	chr4.21027133-21028380	chr4.21425921-21427163	chr5.16195674-16196925	4	7	22	22	G1
868	chr6.166149761-166152227	chr6.168906048-168908511	chr4.162606030-162608479	4	7	22	22	G1
869	chr8.33569047-33574508	chr8.30268493-30273981	chr8.33898771-33903750	4	8	22	22	G1
870	chr9.139053012-139055105	chr9.137283570-137285629	chr15.1220076-1218016	4	13	22	19	G1
871	chr11.94153454-94172913	chr11.93311538-93330941	chr14.93317484-93336136	4	11	22	20	G1
872	chr16.47872853-47873058	chr16.48562693-48562882	chr20.47477906-47478093	4	13	22	20	G1
873	chr17.18028509-18035802	chr17.38034913-38027625	chr16.18105764-18113654	4	9	22	21	G1
874	chr21.45966392-45992421	chr21.45380472-45413671	chr3.1009526-984210	4	7	22	22	G1
875	chr1.64171061-64195416	chr1.65073088-65097394	chr1.66712323-66737523	42	25	13	2	G1
876	chr5.80455235-80569505	chr5.34550455-34436985	chr6.77312379-77426385	42	13	13	8	G1
877	chr6.170577645-170651058	chr6.173673577-173755088	chr4.167429644-167501445	40	26	12	4	G1
878	chr12.13261438-13595329	chr12.13631393-13968270	chr11.13587345-13918637	40	16	12	9	G1
879	chr1.53515027-53518849	chr1.54200321-54204173	chr1.56156265-56160066	2	4	17	29	G1
880	chr18.17273211-17308337	chr18.17190035-17225808	chr18.14433699-14466661	2	4	17	30	G1
881	chr15.29795506-29814108	chr15.28525222-28544432	chr7.10010151-10029121	5	4	24	21	G1
882	chr1.82240343-83767783	chr1.83393432-84949230	chr1.84805546-86313325	38	11	12	13	G1
883	chr2.200003220-200376383	chr2b.204838958-205219303	chr12.63021381-63396272	38	23	12	7	G1
884	chr3.115050556-115162425	chr3.118069649-118184417	chr2.33861378-33970473	38	25	12	6	G1
885	chr5.90209726-90391422	chr5.24732478-24538707	chr6.87112360-87290292	38	19	12	9	G1
886	chr2.76919720-77019643	chr2a.78496366-78596689	chr13.77160808-77266008	38	10	11	14	G1
887	chr8.135912723-136560531	chr8.134531331-135200183	chr8.137381545-138031618	38	14	11	12	G1
888	chr6.146212826-146248022	chr6.148404231-148438907	chr4.117554812-117514002	39	35	11	1	G1
889	chr3.39939363-39945778	chr3.40846292-40852740	chr2.96568340-96561861	36	22	10	10	G1
890	chr6.137023528-137057017	chr6.139009232-139043619	chr4.127173233-127139625	36	25	10	8	G1
891	chr14.26331001-26939597	chr14.25716476-26328876	chr7.89657600-90286958	36	27	10	7	G1
892	chr18.38683146-38687795	chr18.38967922-38972514	chr18.35840564-35845115	36	31	10	5	G1
893	chrX.18558257-18561682	chrX.18666093-18669519	chrX.16382651-16386101	36	22	10	10	G1
894	chr2.50622270-50630506	chr2a.51758818-51767042	chr13.50734584-50742821	36	27	11	7	G1
895	chr3.118894945-118908242	chr3.121977711-121990996	chr2.37717057-37730694	36	15	11	13	G1
896	chr1.143638702-143642183	chr1.114411758-114408277	chr1.123273057-123269564	34	31	9	7	G1
897	chr2.55107052-55107364	chr2a.56327714-56328026	chr13.55321329-55321641	34	31	9	7	G1
898	chr2.66791822-66802274	chr2a.68175592-68187033	chr13.66991342-67000147	34	25	9	10	G1
899	chr2.217533817-217601535	chr2b.222841835-222910316	chr12.80767962-80842933	34	29	9	8	G1
900	chr15.87457962-87463646	chr15.86839694-86845386	chr7.68737520-68743444	31	29	9	10	G1
901	chr11.46351191-46353054	chr11.46889909-46892457	chr14.25753878-25752084	1	0	13	35	G1
902	chr2.102645387-102666254	chr2a.103751444-103772401	chr13.102566850-102587765	0	2	14	34	G1
903	chr22.37232049-37232207	chr22.37449803-37449961	chr10.82409757-82409915	2	13	19	22	G1
904	chr2.101282562-101337368	chr2a.102347466-102403492	chr13.101242313-101300127	42	14	13	8	G1
905	chr7.105309213-105326775	chr7.105824572-105842812	chr3.143300779-143318337	42	20	13	5	G1
906	chr9.78505567-78511817	chr9.75574090-75580350	chr15.85444000-85450200	39	23	12	6	G1
907	chr17.64826730-64829109	chr17.68684195-68686573	chr16.64568557-64570989	39	31	12	2	G1
908	chr2.65859420-66194778	chr2a.67228120-67571873	chr13.66094497-66443556	39	27	13	4	G1
909	chr2.76825250-76962817	chr2a.78402828-78539827	chr13.77078435-77206044	39	14	13	11	G1
910	chr12.126515507-126995834	chr12.129422565-129914186	chr11.128770274-129218250	39	28	13	3	G1
911	chr14.26137598-26607527	chr14.25525285-26002517	chr7.89480976-89939807	37	28	12	5	G1
912	chr16.12963327-13241742	chr16.13355578-13638544	chr20.13033519-13316532	37	12	12	13	G1
913	chr4.184369509-184442390	chr4.187865416-187939064	chr5.175316859-175387901	37	25	11	7	G1
914	chr16.76024281-76038557	chr16.77446588-77460842	chr20.75597934-75612228	37	35	11	2	G1
915	chr1.14494852-14659932	chr1.14461268-14639317	chr1.16933002-17096095	36	35	12	2	G1
916	chr7.34008700-34020297	chr7.34402587-34414172	chr3.92141092-92129221	36	35	12	2	G1
917	chr11.35238986-35243839	chr11.35542252-35547108	chr14.36577720-36572828	36	16	12	12	G1
918	chr1.204641826-204646247	chr1.186791171-186795589	chr1.163960484-163955996	3	4	22	24	G1
919	chr3.145172353-145174267	chr3.148714279-148716206	chr2.143821251-143819345	3	13	22	20	G1
920	chr4.102485894-102486887	chr4.104627786-104628768	chr5.94314147-94315124	3	10	22	21	G1
921	chr4.4439658-4457639	chr4.4480539-4498302	chr5.4374847-4357113	4	8	20	23	G1
922	chr16.73819413-73821020	chr16.75180521-75182126	chr20.73331852-73333426	4	10	20	22	G1
923	chr17.39468035-39487322	chr17.13528291-13508885	chr16.54110544-54132365	4	6	20	24	G1
924	chr14.89933290-89934563	chr14.90533716-90535921	chr7.153608778-153610074	3	13	21	20	G1
925	chr16.2558906-2580086	chr16.2688128-2709303	chr20.2590765-2614484	3	5	21	24	G1
926	chr22.20627356-20643054	chr22.20542894-20559289	chr10.65697113-65713713	4	13	21	20	G1
927	chr22.49307297-49308763	chr22.49880329-49881795	chr10.94544044-94545537	4	4	21	25	G1
928	chr1.116717397-116717572	chr1.121245884-121245709	chr1.119346466-119346644	4	11	21	21	G1
929	chr8.145230636-145232782	chr8.144084072-144086208	chr8.146718108-146720271	4	12	21	20	G1
930	chr9.111296844-111511856	chr9.108922286-109140714	chr15.26705642-26493457	4	6	21	24	G1
931	chr11.32582149-32592230	chr11.32813212-32822969	chr14.39189397-39179924	4	7	21	23	G1
932	chr13.22072093-22140730	chr13.22148617-22224557	chr17.3192446-3262640	4	5	21	24	G1
933	chr18.38933174-38942287	chr18.39220617-39230550	chr18.36095077-36103834	35	33	10	5	G1
934	chr2.198388537-198423265	chr2b.203198446-203235209	chr12.61411587-61455028	35	32	11	5	G1
935	chr3.15669799-15682893	chr3.16034340-16047469	chr2.157988981-158002043	35	27	11	8	G1
936	chr3.149240931-149281475	chr3.152876019-152916671	chr2.139720442-139680103	35	32	11	5	G1
937	chr8.136544845-136592645	chr8.135184508-135232310	chr8.138010363-138063690	35	22	11	10	G1
938	chr8.136686707-136732386	chr8.135343741-135389040	chr8.138154071-138199294	35	24	11	9	G1
939	chr12.96462431-97175348	chr12.98562390-99300026	chr11.98764115-99438881	35	20	11	11	G1
940	chr5.88019674-88051764	chr5.26966357-26934059	chr6.84976551-85007123	34	21	11	11	G1
941	chr5.153147180-153158422	chr5.155754960-155766182	chr6.150138040-150149866	34	23	11	10	G1
942	chr8.136562847-136624084	chr8.135202494-135263221	chr8.138033936-138093254	34	25	11	9	G1
943	chr14.60332714-60355285	chr14.60188667-60209737	chr7.123811695-123836031	34	21	11	11	G1
944	chr12.15462311-15595062	chr12.15872458-15997449	chr11.15806951-15939067	44	17	16	3	G1
945	chr3.86203732-86204807	chr3.88346625-88347699	chr2.10349064-10350175	33	22	10	12	G1
946	chr7.128087787-128175901	chr7.129060652-129150611	chr3.165993471-166072300	33	30	10	8	G1
947	chr11.629562-664325	chr11.681099-731055	chr14.451104-482751	33	22	10	12	G1
948	chr1.24449776-24583271	chr1.24473577-24611513	chr1.26885859-27019862	33	25	9	11	G1
949	chr1.1707466-1707876	chr1.1656685-1657095	chr1.4814363-4814773	34	24	9	11	G1
950	chr1.26519406-26639802	chr1.26544036-26670704	chr1.28940127-29068506	34	26	9	10	G1
951	chr2.77609757-78488976	chr2a.79206844-80112347	chr13.77890130-78807225	34	32	9	7	G1
952	chr5.24658921-24672024	chr5.91349248-91335028	chr6.24642052-24655371	34	30	9	8	G1
953	chr11.32910836-32911532	chr11.33149734-33150430	chr14.38877359-38876663	34	28	9	9	G1
954	chr18.27970051-28098726	chr18.28049663-28178213	chr18.25074362-25187361	34	26	9	10	G1
955	chr2.241657058-241660788	chr2b.247463831-247467574	chr12.104965569-104969246	5	5	23	22	G1
956	chr7.153463862-153465564	chr7.154777052-154778754	chr3.191122301-191124025	5	5	23	22	G1
957	chr3.95485182-96139218	chr3.98033662-98705380	chr2.14749683-15349570	2	6	16	30	G1
958	chr8.145183514-145186546	chr8.144035676-144038713	chr8.146669877-146673154	2	8	16	29	G1
959	chr8.42527643-42735761	chr8.39325878-39543986	chr8.43146722-43364212	11	60	3	11	G2
960	chr1.16175113-16242808	chr1.16187465-16259765	chr1.18778701-18849146	17	67	5	2	G2
961	chr19.14487832-14488512	chr19.14934323-14935004	chr19.14228735-14229418	5	65	5	9	G2
962	chr19.14488315-14488719	chr19.14934807-14935211	chr19.14229221-14229625	4	63	4	12	G2
963	chr19.14487526-14488279	chr19.14934017-14934771	chr19.14228442-14229185	8	61	4	10	G2
964	chr8.42718398-42812313	chr8.39524293-39623720	chr8.43347333-43439937	19	60	4	5	G2
965	chr6.31886412-31897235	chr6.32378005-32389751	chr4.31459901-31470677	7	63	5	9	G2
966	chr15.39938424-39978439	chr15.38888495-38930135	chr7.20278261-20318903	7	68	9	3	G2
967	chr7.153461410-153462901	chr7.154773359-154776124	chr3.191119951-191121371	4	0	34	14	G2
968	chr19.14488575-14498131	chr19.14935067-14945194	chr19.14229481-14239788	5	57	5	13	G2
969	chr11.4467226-4576426	chr11.4348642-4421610	chr14.69216727-69112764	2	0	33	15	G2
970	chr1.191204016-191248683	chr1.172773442-172818160	chr1.177636365-177592522	27	42	2	13	G2
971	chr15.41656356-41662423	chr15.40710397-40716392	chr7.22019534-22025764	3	0	32	16	G2
972	chr2.120620847-120641509	chr2b.120796695-120819489	chr13.126363361-126384886	28	44	3	11	G2
973	chr14.38003919-38368387	chr14.37623948-38000727	chr7.101425731-101809682	31	40	2	12	G2
974	chr9.3060247-3139374	chr9.3113771-3184284	chr15.74166713-74092369	26	43	2	12	G2
975	chr17.69977874-70121892	chr17.74005766-74158305	chr16.69747054-69876225	5	0	33	14	G2
976	chr19.14454671-14487298	chr19.14899132-14933789	chr19.14192457-14228211	7	53	6	13	G2
977	chr16.2531953-2553722	chr16.2652891-2682940	chr20.2553395-2585242	5	0	27	20	G2
978	chr19.14487071-14487504	chr19.14933562-14933995	chr19.14227985-14228420	8	51	6	13	G2
979	chr19.14487328-14487823	chr19.14933819-14934314	chr19.14228241-14228726	8	52	7	12	G2
980	chr1.53143879-53153310	chr1.53811021-53822606	chr1.55770326-55781482	25	46	6	8	G2
981	chr1.204574823-204578935	chr1.186723548-186727665	chr1.164025976-164021880	5	2	32	14	G2
982	chr6.31893353-31903626	chr6.32385835-32397029	chr4.31466921-31477084	2	56	9	11	G2
983	chr5.75826930-75895208	chr5.39358264-39288751	chr6.72652131-72719128	9	0	30	15	G2
984	chr7.153471284-153474030	chr7.154784457-154787208	chr3.191129789-191132443	5	0	30	17	G2
985	chrX.6155584-6373830	chrX.6097952-6307264	chrX.3849894-4057598	4	0	29	18	G2
986	chr18.18770738-18827713	chr18.18732613-18789820	chr18.15939705-16001798	31	36	3	13	G2
987	chr4.173614185-173747197	chr4.176910627-177044148	chr5.164519258-164649830	26	42	4	11	G2
988	chr2.98853749-98891247	chr2a.99798749-99834651	chr13.98782439-98822647	4	2	32	15	G2
989	chr2.98894561-99025056	chr2a.99837940-99979120	chr13.98825976-98960231	9	0	28	17	G2
990	chr2.120578022-120582634	chr2b.120753087-120757699	chr13.126300263-126305154	28	41	5	10	G2
991	chr2.194035397-195552259	chr2b.198760704-200302597	chr12.57170230-58618772	22	41	5	13	G2
992	chr2.98869325-98910230	chr2a.99814323-99853593	chr13.98798633-98842923	3	1	32	16	G2
993	chr17.74995910-75029729	chr17.79195581-79221387	chr16.74749162-74781278	3	1	31	16	G2
994	chr5.75951630-75996823	chr5.39230659-39185431	chr6.72776997-72823499	2	2	31	16	G2
995	chr7.32015830-32053791	chr7.32370601-32410565	chr3.94214269-94181183	21	43	6	12	G2
996	chr18.4426292-4434461	chr18.12234751-12226597	chr18.9735284-9729573	22	43	5	11	G2
997	chr22.38042878-38063479	chr22.38277127-38305031	chr10.83222555-83247921	31	38	3	12	G2
998	chr5.75898565-75949219	chr5.39285405-39233066	chr6.72722493-72774902	5	0	27	20	G2
999	chr8.117866141-117928140	chr8.116162362-116224571	chr8.119301121-119363080	27	42	6	9	G2
1000	chr3.312886-332791	chr3.353249-374007	chr2.60739302-60718966	6	2	30	15	G2
1001	chr17.38089431-38090968	chr17.14844383-14842847	chr16.52806327-52807875	6	2	30	15	G2
1002	chr3.307183-325523	chr3.347509-365873	chr2.60745038-60726875	7	2	30	15	G2
1003	chr5.111531475-111550903	chr5.113417615-113437089	chr6.108438781-108458209	5	2	29	17	G2
1004	chr5.75856502-75927945	chr5.39329225-39255698	chr6.72681750-72753046	7	0	26	19	G2
1005	chr11.64960723-64963147	chr11.63875336-63877755	chr14.8992877-8987693	23	48	9	5	G2
1006	chr4.173571363-173680435	chr4.176867827-176976514	chr5.164475878-164588651	27	41	5	10	G2
1007	chr1.95075905-95135734	chr1.96346843-96406677	chr1.97859350-97918192	26	41	6	10	G2
1008	chr6.94105141-94116124	chr6.94685203-94696571	chr4.89255453-89266725	28	46	8	5	G2
1009	chr2.98815753-98866931	chr2a.99760219-99811928	chr13.98742015-98796307	5	1	29	17	G2
1010	chr7.31977903-32012761	chr7.32326914-32367534	chr3.94255489-94217163	31	35	4	13	G2
1011	chr6.94128552-94155655	chr6.94708987-94742920	chr4.89279025-89306188	23	43	6	10	G2
1012	chr10.46419429-46423209	chr10.46724923-46731519	chr9.49497852-49501561	28	48	8	3	G2
1013	chr14.61548842-61618970	chr14.61422653-61494742	chr7.125016245-125079161	7	0	25	20	G2
1014	chr8.79678083-79679327	chr8.77157392-77158637	chr8.81057270-81058519	18	40	6	15	G2
1015	chr20.44502781-44508142	chr20.43822329-43828011	chr10.18041942-18036327	24	37	4	14	G2
1016	chr2.58239105-58271657	chr2a.59486466-59519636	chr13.58373053-58405102	10	2	28	16	G2
1017	chr6.28241272-28248726	chr6.28649249-28656687	chr4.27867263-27874639	8	1	29	16	G2
1018	chr6.91761782-92437698	chr6.92294588-92972379	chr4.86876484-87551228	20	47	8	7	G2
1019	chr16.87791264-87793229	chr16.89604768-89606731	chr20.87352142-87354096	23	42	7	10	G2
1020	chr15.39927219-39973763	chr15.38874814-38925388	chr7.20267077-20314281	16	42	6	14	G2
1021	chr4.173508568-173608608	chr4.176805511-176905038	chr5.164420773-164513560	31	36	4	11	G2
1022	chr2.98805885-98851927	chr2a.99750353-99796921	chr13.98732155-98780589	10	2	27	16	G2
1023	chr2.241659172-241662157	chr2b.247465959-247468943	chr12.104967679-104970624	8	2	27	18	G2
1024	chr9.111215977-111239021	chr9.108841375-108864220	chr15.26787293-26764068	7	2	27	18	G2
1025	chr17.73619955-73635292	chr17.77778684-77794312	chr16.73404324-73420378	5	2	27	19	G2
1026	chr1.1553280-1563279	chr1.1555543-1563817	chr1.4690830-4700603	5	1	28	18	G2
1027	chr1.14981834-14987307	chr1.14967906-14973720	chr1.17414418-17420172	15	2	26	14	G2
1028	chr4.173691252-173822212	chr4.176987358-177119533	chr5.164597041-164726279	28	35	5	13	G2
1029	chr4.142482591-143033369	chr4.145114850-145680188	chr5.133794983-134333126	23	40	7	11	G2
1030	chr18.4420329-4431262	chr18.12241134-12229791	chr18.9741060-9732733	23	39	7	11	G2
1031	chr3.299853-312534	chr3.340160-352891	chr2.60751091-60739675	5	2	26	20	G2
1032	chr12.56631873-56655283	chr12.31642295-31618332	chr11.55049065-55074889	7	2	26	19	G2
1033	chr17.38101378-38104222	chr17.14833505-14830686	chr16.52817686-52820996	11	2	26	17	G2
1034	chr16.54887635-54894577	chr16.55718740-55726105	chr20.54612550-54619208	8	2	25	19	G2
1035	chr3.149005758-149149253	chr3.152637051-152783640	chr2.139955244-139818373	5	1	26	20	G2
1036	chr9.111229089-111249305	chr9.108854454-108874493	chr15.26773937-26753565	10	2	26	17	G2
1037	chr9.116210112-116219416	chr9.113881766-113891543	chr15.21719990-21710702	5	2	26	20	G2
1038	chr5.132193193-132197312	chr5.134459319-134463334	chr6.129236631-129240086	3	3	29	17	G2
1039	chr14.53337665-53921337	chr14.53045822-53632281	chr7.116825959-117392794	28	36	6	11	G2
1040	chr14.95627065-95627708	chr14.96381657-96382301	chr7.159323710-159324353	26	36	6	12	G2
1041	chr6.112503982-112509295	chr6.114014139-114019459	chr4.151866797-151861534	26	37	6	12	G2
1042	chr12.50735786-50739103	chr12.37580773-37577461	chr11.49185555-49189190	8	44	8	15	G2
1043	chr18.27347786-27455030	chr18.27411665-27522595	chr18.24436854-24540400	6	44	8	16	G2
1044	chr6.31905409-31912193	chr6.32398812-32406031	chr4.31478868-31484914	8	53	13	6	G2
1045	chr6.94009073-94022297	chr6.94588539-94601950	chr4.89161055-89173934	18	39	6	14	G2
1046	chr9.137913465-137914238	chr9.135975188-135976499	chr15.2446366-2445603	26	46	9	4	G2
1047	chr8.12908148-12909582	chr8.8964283-8965768	chr8.12766293-12767603	27	41	7	8	G2
1048	chr2.217639110-217724665	chr2b.222948845-223034792	chr12.80880614-80963040	28	42	7	7	G2
1049	chr7.32038477-32077215	chr7.32395261-32433961	chr3.94196296-94157724	23	41	8	10	G2
1050	chr11.131280033-131284488	chr11.131019132-131023590	chr14.129924667-129929124	29	35	6	11	G2
1051	chr14.41168616-41180842	chr14.40634046-40646254	chr7.104660745-104674040	3	3	27	19	G2
1052	chr5.10750265-10789873	chr5.10897308-10941115	chr6.10618742-10654023	7	2	25	20	G2
1053	chr20.24478954-24497055	chr20.24879482-24897549	chr10.57764195-57777718	12	2	24	18	G2
1054	chr4.142366552-142784327	chr4.144996774-145424307	chr5.133683732-134096811	25	43	8	7	G2
1055	chr6.94120707-94144853	chr6.94701164-94732126	chr4.89271352-89295350	27	43	8	6	G2
1056	chr16.87792620-87793812	chr16.89606122-89607314	chr20.87353499-87354690	19	43	8	10	G2
1057	chr5.131678063-131699644	chr5.133935647-133957326	chr6.128728564-128750525	28	38	6	10	G2
1058	chr2.141836420-141852530	chr2b.145657889-145675212	chr12.4869320-4884225	25	38	7	11	G2
1059	chr15.56064554-56261782	chr15.55452711-55647092	chr7.36319796-36518144	19	38	7	14	G2
1060	chr3.113086414-113167193	chr3.116080469-116162422	chr2.31980597-32059401	16	45	10	9	G2
1061	chr1.143622156-143627993	chr1.112107031-114422432	chr1.127373946-123283581	30	35	6	11	G2
1062	chr5.83298232-83390093	chr5.31672764-31579621	chr6.80163753-80253125	30	35	6	11	G2
1063	chr2.142249094-142255809	chr2b.146084260-146090968	chr12.5289962-5296308	26	35	5	13	G2
1064	chr3.78993423-79014417	chr3.80926416-80947420	chr2.3293758-3315650	27	42	9	6	G2
1065	chr11.64956103-64959624	chr11.63870732-63874237	chr14.8997219-8993959	21	42	9	9	G2
1066	chr12.38222589-38232162	chr12.50343021-50333441	chr11.36390825-36419793	22	43	8	9	G2
1067	chr11.76566269-76707582	chr11.75585305-75730584	chr14.75356624-75504986	7	3	26	18	G2
1068	chr20.47422841-47424059	chr20.46810900-46812118	chr10.15101782-15100564	9	3	26	17	G2
1069	chr9.123674014-123703884	chr9.121507982-121540149	chr15.14130717-14100597	8	1	25	20	G2
1070	chr9.106626647-106642307	chr9.104140880-104156529	chr15.31415486-31399543	5	2	24	22	G2
1071	chr14.61531072-61606135	chr14.61404860-61480705	chr7.124998221-125066285	5	2	24	22	G2
1072	chr22.44862864-44865916	chr22.45272034-45275434	chr10.90097709-90100751	11	2	24	19	G2
1073	chr5.41480308-41486086	chr5.74151811-74146042	chr6.41310950-41316100	12	2	23	19	G2
1074	chr2.198067383-198072010	chr2b.202870801-202875429	chr12.61111106-61117639	15	43	10	10	G2
1075	chr2.217728007-217791698	chr2b.223038128-223105346	chr12.80966335-81031217	28	37	7	10	G2
1076	chr6.123143175-123152197	chr6.124888689-124897693	chr4.141162469-141153297	28	37	7	10	G2
1077	chr21.45050424-45074961	chr21.44452477-44478518	chr3.1900302-1877294	24	37	7	12	G2
1078	chr4.113724594-113759545	chr4.116055421-116093478	chr5.105413624-105441434	19	46	11	6	G2
1079	chr7.31118381-31344865	chr7.31470699-31694593	chr3.95114127-94889068	26	39	8	9	G2
1080	chr2.141576124-141628308	chr2b.145393387-145446587	chr12.4590543-4639838	29	35	5	12	G2
1081	chr16.47907950-47911438	chr16.48599087-48602578	chr20.47514147-47517649	30	34	5	12	G2
1082	chr6.94111771-94120349	chr6.94692214-94700806	chr4.89262115-89270994	23	43	9	7	G2
1083	chr1.143653019-143655987	chr1.114397423-114394032	chr1.123257511-123254537	21	43	10	8	G2
1084	chr15.41679480-41697107	chr15.40734037-40746093	chr7.22043866-22061375	6	3	26	19	G2
1085	chr2.142418243-142431067	chr2b.146255148-146269459	chr12.5468816-5481874	23	36	6	13	G2
1086	chr7.79844948-80371096	chr7.79775862-80317094	chr3.136924060-136403057	13	45	10	10	G2
1087	chr4.3472714-3482319	chr4.3641425-3650797	chr1.431793-425353	6	2	22	23	G2
1088	chr9.139114914-139121664	chr9.137352364-137357825	chr15.1153661-1145611	5	2	22	23	G2
1089	chr14.61408125-61459966	chr14.61281914-61334071	chr7.124874110-124927402	6	2	22	23	G2
1090	chr16.63633247-63640892	chr16.64713567-64721211	chr20.63292225-63300193	12	2	22	20	G2
1091	chr22.18616803-18623057	chr22.18732786-18740452	chr10.64322322-64328869	7	1	23	22	G2
1092	chr2.58622208-58720138	chr2a.59877919-59976609	chr13.58732788-58830445	8	2	23	22	G2
1093	chr6.93786881-94014010	chr6.94350879-94593477	chr4.88935416-89165964	23	39	7	11	G2
1094	chr14.95622635-95623366	chr14.96377279-96378009	chr7.159319228-159319959	28	39	7	9	G2
1095	chr7.31873440-31937727	chr7.32221126-32286685	chr3.94356533-94290679	26	40	8	9	G2
1096	chr15.56186831-56349077	chr15.55577806-55734105	chr7.36448553-36602466	23	43	9	7	G2
1097	chr11.74914200-74960607	chr11.73899444-73946663	chr14.73708916-73751913	7	44	10	13	G2
1098	chr7.31912922-31966471	chr7.32261806-32315487	chr3.94315703-94260715	27	35	7	12	G2
1099	chr2.40510294-40623062	chr2a.41371869-41489639	chr13.40441100-40564967	24	35	6	13	G2
1100	chr3.49674012-49675511	chr3.50839356-50840855	chr2.86760212-86758710	13	3	25	17	G2
1101	chr6.28237853-28243770	chr6.28645834-28651748	chr4.27863847-27869771	6	3	25	20	G2
1102	chr7.153469989-153472893	chr7.154783162-154786072	chr3.191128492-191131361	10	3	25	18	G2
1103	chr7.86622738-86625725	chr7.86746748-86749730	chr3.130111208-130108210	24	37	8	11	G2
1104	chr14.54106086-54119003	chr14.53821427-53834292	chr7.117590407-117603852	22	37	8	12	G2
1105	chr2.120580279-120585635	chr2b.120755341-120760680	chr13.126302493-126307729	23	37	7	12	G2
1106	chr2.142245449-142252212	chr2b.146080556-146087374	chr12.5286296-5292734	21	38	7	13	G2
1107	chr19.21371819-21377278	chr19.21678088-21685822	chr19.20656914-20662586	21	38	7	13	G2
1108	chr7.153464605-153466795	chr7.154777795-154779965	chr3.191123048-191125232	5	2	22	24	G2
1109	chr14.61157928-61185304	chr14.61021954-61052242	chr7.124619667-124647157	5	1	22	24	G2
1110	chr6.16435283-16435598	chr6.16652436-16652751	chr4.16344020-16344335	10	2	22	22	G2
1111	chr1.22922004-23028667	chr1.22898788-23004895	chr1.25312592-25418186	7	1	23	22	G2
1112	chr2.182503291-182674538	chr2b.187048145-187219939	chr12.45539011-45710843	28	39	8	7	G2
1113	chr19.21373537-21380458	chr19.21679805-21689007	chr19.20658629-20667264	22	39	9	10	G2
1114	chr6.49627284-49633078	chr6.50686891-50692923	chr4.49272395-49277554	5	0	15	32	G2
1115	chr17.41604871-41605298	chr17.11317687-11317260	chr16.56798533-56798960	21	41	9	9	G2
1116	chr1.208026650-208075739	chr1.190226752-190277690	chr1.160608093-160557652	23	40	10	8	G2
1117	chr6.127447255-127485959	chr6.129296427-129335395	chr4.136835448-136797132	24	40	10	7	G2
1118	chr11.64954470-64957523	chr11.63869097-63872144	chr14.8998819-8995808	24	40	10	7	G2
1119	chr15.47943068-48180144	chr15.47123389-47366093	chr7.28188911-28423543	18	46	11	6	G2
1120	chr2.7222093-7275509	chr2a.7324141-7381055	chr13.7233014-7280314	27	45	11	2	G2
1121	chr2.141410674-141469252	chr2b.145227418-145286597	chr12.4444222-4497182	28	34	6	12	G2
1122	chr4.107383116-107392831	chr4.109625291-109635105	chr5.99252496-99261511	24	36	7	12	G2
1123	chr6.127488323-127510413	chr6.129337742-129359795	chr4.136794770-136772934	28	36	7	10	G2
1124	chr1.53065065-53143711	chr1.53724639-53810853	chr1.55677621-55770160	21	36	8	13	G2
1125	chr16.69385177-69471263	chr16.70637285-70724172	chr20.71843168-71756126	27	36	8	10	G2
1126	chr12.82022238-82040145	chr12.83812763-83831367	chr11.80086189-80101261	10	3	24	19	G2
1127	chr16.7330458-7333024	chr16.7568909-7571457	chr20.7519889-7522323	8	3	24	20	G2
1128	chr22.24920271-24926841	chr22.24983421-24990060	chr10.70024216-70030994	14	3	24	17	G2
1129	chr7.29375877-29377311	chr7.29745622-29747056	chr3.96839387-96837958	11	3	24	18	G2
1130	chr14.61606209-61637782	chr14.61480779-61513544	chr7.125066359-125097901	7	3	24	20	G2
1131	chr15.29776252-29804165	chr15.28505426-28534127	chr7.9991218-10018788	6	3	23	22	G2
1132	chr3.29418845-29618780	chr3.30081178-30286586	chr2.171839483-172036327	21	38	9	11	G2
1133	chr6.110661184-110776084	chr6.112110383-112229906	chr4.153727422-153614644	26	39	8	9	G2
1134	chr17.64819881-64824492	chr17.68677348-68681947	chr16.64561705-64566292	26	39	10	7	G2
1135	chr11.17762451-17766013	chr11.17739602-17744159	chr14.54150885-54147398	13	2	20	22	G2
1136	chr14.61425567-61506682	chr14.61299355-61380499	chr7.124890876-124973653	7	2	20	25	G2
1137	chr3.295641-306080	chr3.335974-346409	chr2.60755239-60745847	5	1	21	25	G2
1138	chr7.55294526-55390350	chr7.56253288-56350590	chr3.71080840-70981127	7	1	22	24	G2
1139	chr2.163383413-163393443	chr2b.167541034-167551332	chr12.26393240-26403493	32	42	10	2	G2
1140	chr17.64822468-64826582	chr17.68679932-68684047	chr16.64564280-64568409	26	42	10	5	G2
1141	chr1.208020048-208033035	chr1.190220123-190233575	chr1.160614677-160601716	18	42	11	9	G2
1142	chr3.122316535-122318526	chr3.125432884-125434875	chr2.41107678-41109653	21	42	11	7	G2
1143	chr11.64957895-64960654	chr11.63872511-63875267	chr14.8995706-8992946	26	43	12	3	G2
1144	chr11.64963536-64967528	chr11.63878144-63882129	chr14.8987313-8981120	29	43	12	2	G2
1145	chr2.198059890-198069598	chr2b.202863276-202873018	chr12.61103342-61114555	18	47	12	5	G2
1146	chr14.54133284-54146814	chr14.53848552-53862239	chr7.117618825-117632165	31	33	6	11	G2
1147	chr19.55245071-55342101	chr19.55800160-55837046	chr19.56325343-56349934	2	0	14	35	G2
1148	chr5.14759999-14762832	chr5.14979473-14982339	chr6.14896903-14899766	29	35	8	10	G2
1149	chr5.149554612-149557750	chr5.152157063-152160202	chr6.146674295-146677414	23	35	8	13	G2
1150	chr2.162570474-162946141	chr2b.166715665-167094761	chr12.25573735-25954332	28	36	9	8	G2
1151	chr5.149512414-149556251	chr5.152112469-152158703	chr6.146632549-146675913	26	36	9	9	G2
1152	chr16.55074851-55092773	chr16.55911246-55931709	chr20.54796366-54811878	28	36	9	9	G2
1153	chr18.4417213-4426022	chr18.12244247-12235021	chr18.9744200-9735550	28	36	9	8	G2
1154	chr14.54110672-54126823	chr14.53826010-53842091	chr7.117595403-117612079	24	38	8	10	G2
1155	chr2.165942363-165944694	chr2b.170122946-170125275	chr12.29036931-29039598	29	37	9	7	G2
1156	chr2.72211808-72212780	chr2a.73685541-73686512	chr13.72384242-72385215	29	37	8	8	G2
1157	chr15.43447718-43455299	chr15.42544940-42552517	chr7.23709718-23717667	23	37	8	11	G2
1158	chr19.23335139-23336462	chr19.23572939-23574262	chr19.22396018-22397341	28	37	8	9	G2
1159	chr6.100000791-100019103	chr6.101056696-101075163	chr4.95389492-95400465	32	39	10	4	G2
1160	chr16.18711482-18711928	chr16.18891057-18891515	chr20.17785308-17785763	32	39	10	4	G2
1161	chr2.70005685-70018741	chr2a.71442932-71455993	chr13.70180616-70193624	21	39	9	10	G2
1162	chr12.116629843-116672405	chr12.119191130-119234832	chr11.118658784-118692686	17	3	23	17	G2
1163	chr18.17339784-17356946	chr18.17258854-17275979	chr18.14497987-14516464	8	3	23	21	G2
1164	chr14.64329706-64332029	chr14.64261135-64263460	chr7.127792791-127795114	11	3	22	20	G2
1165	chr17.24517346-24519424	chr17.28166228-28164262	chr16.24385353-24387706	9	3	22	21	G2
1166	chr6.73004305-73006390	chr6.73022960-73025048	chr4.68503843-68506147	25	41	10	6	G2
1167	chr11.64961874-64965994	chr11.63876482-63880610	chr14.8991776-8982655	29	41	10	4	G2
1168	chr6.127497683-127520622	chr6.129347096-129369987	chr4.136785444-136762531	26	41	11	5	G2
1169	chr21.27063615-27138729	chr21.26588996-26664135	chr3.19898184-19822460	12	41	11	12	G2
1170	chr5.172130128-172130733	chr5.175064815-175065420	chr6.169162586-169163187	16	47	14	4	G2
1171	chr1.91558676-91613027	chr1.92785565-92840213	chr1.94032773-94366811	25	45	12	2	G2
1172	chr11.64959764-64961710	chr11.63874377-63876318	chr14.8993819-8991939	23	45	13	3	G2
1173	chr1.204615346-204623449	chr1.186764061-186772157	chr1.163986340-163977934	6	1	20	26	G2
1174	chr2.241622893-241628740	chr2b.247427145-247433214	chr12.104938837-104944368	5	1	20	26	G2
1175	chr14.61133568-61174219	chr14.60997313-61041176	chr7.124594730-124636047	3	1	20	27	G2
1176	chr14.41374494-41389206	chr14.40843505-40858974	chr7.104852613-104867388	10	2	20	24	G2
1177	chr14.95629102-95744780	chr14.96383695-96502758	chr7.159325752-159445185	31	32	6	11	G2
1178	chr1.204623538-204628342	chr1.186772246-186777026	chr1.163977845-163973381	7	3	25	20	G2
1179	chr2.100063847-100076371	chr2a.101078524-101091060	chr13.100036046-100048542	6	3	25	20	G2
1180	chr9.138856346-138858781	chr9.137074650-137075779	chr15.1416352-1413932	6	3	25	20	G2
1181	chr14.87799448-87824193	chr14.88336327-88361125	chr7.151459036-151484077	7	3	25	20	G2
1182	chr2.217609357-217684789	chr2b.222918166-222993128	chr12.80850814-80924441	26	34	8	12	G2
1183	chr3.3610438-3710268	chr3.3704783-3805468	chr2.57407295-57308043	26	34	8	12	G2
1184	chr18.4408286-4419808	chr18.12253230-12241656	chr18.9753914-9741581	28	34	8	11	G2
1185	chr5.111094301-111094455	chr5.112969278-112969432	chr6.108015198-108015352	23	35	7	13	G2
1186	chr2.86582377-86583829	chr2a.88448721-88450164	chr13.87079996-87081456	21	36	8	12	G2
1187	chr5.24672315-24679850	chr5.91334737-91327132	chr6.24655662-24663142	30	36	8	8	G2
1188	chr8.12911045-12914648	chr8.8967234-8970833	chr8.12769059-12771329	30	36	8	8	G2
1189	chr20.44495050-44506837	chr20.43816999-43826710	chr10.18049682-18037653	26	36	8	11	G2
1190	chr5.149558097-149568513	chr5.152160513-152170894	chr6.146677743-146688395	27	35	9	9	G2
1191	chr5.161226152-161229506	chr5.163994525-163997875	chr6.158285685-158289045	23	35	9	11	G2
1192	chr5.60083768-60110836	chr5.54998595-54971538	chr6.58458292-58483742	26	38	9	8	G2
1193	chr9.19366252-19368823	chr9.19833063-19836051	chr15.57599447-57596879	28	38	9	7	G2
1194	chr4.113676590-113730440	chr4.116005725-116061264	chr5.105372875-105419791	25	39	9	8	G2
1195	chr2.187251139-187252940	chr2b.191890547-191892347	chr12.50292290-50294089	20	39	11	9	G2
1196	chr18.27427251-27457309	chr18.27493602-27524882	chr18.24513350-24542701	13	42	12	10	G2
1197	chr1.10489293-10552324	chr1.10671365-10736888	chr1.13597994-13662198	10	3	22	21	G2
1198	chr1.164502259-164906933	chr1.145596103-146010854	chr1.196095401-196443814	14	3	22	19	G2
1199	chr1.232470865-232476507	chr1.214949986-214955614	chr1.222750318-222744482	14	3	22	19	G2
1200	chr2.58663682-58766798	chr2a.59919321-60024388	chr13.58775549-58876341	10	3	22	21	G2
1201	chr3.424513-425317	chr3.459759-460562	chr2.60626632-60625829	10	3	22	21	G2
1202	chr16.86235872-86240432	chr16.87994247-87998791	chr20.85768921-85773487	7	3	22	22	G2
1203	chr14.87832428-87847225	chr14.88369103-88385719	chr7.151493404-151508973	8	1	19	26	G2
1204	chr9.139180302-139181023	chr9.137416119-137416840	chr15.1078749-1078030	8	1	20	25	G2
1205	chr6.49626662-49628686	chr6.50686269-50688292	chr4.49271770-49273790	3	2	19	28	G2
1206	chr22.18631403-18633030	chr22.18748842-18750458	chr10.64337830-64339465	7	2	19	26	G2
1207	chr1.180034887-180038893	chr1.161435225-161439235	chr1.188894099-188890102	8	2	18	26	G2
1208	chr14.87738371-87748126	chr14.88275473-88285377	chr7.151398892-151408244	8	2	18	26	G2
1209	chr14.87812062-87830141	chr14.88348732-88366816	chr7.151471992-151490818	7	2	18	27	G2
1210	chr17.63851376-63925457	chr17.67678331-67752980	chr16.63622660-63685688	28	34	7	11	G2
1211	chr2.120574751-120579770	chr2b.120749822-120754832	chr13.126297011-126301968	28	33	8	11	G2
1212	chr6.100019217-100023165	chr6.101075277-101079193	chr4.95400579-95404830	23	35	8	12	G2
1213	chr1.143654247-143658018	chr1.114396195-114391996	chr1.123256291-123252304	24	35	8	11	G2
1214	chr16.21188619-21518670	chr16.21359616-21846679	chr20.20145376-20875259	22	35	8	12	G2
1215	chr18.4438495-4442682	chr18.12222891-12218704	chr18.9724204-9720023	27	35	8	10	G2
1216	chr21.32723202-32784818	chr21.32177095-32238246	chr3.14082322-14020198	24	35	8	11	G2
1217	chr6.100021278-100031052	chr6.101077308-101088534	chr4.95402608-95412825	25	35	8	11	G2
1218	chr15.48084004-48305438	chr15.47267519-47490523	chr7.28333452-28541841	18	43	13	6	G2
1219	chr10.29811195-29963451	chr10.30181663-30337129	chr9.29622704-29770531	13	43	12	9	G2
1220	chr3.13060910-13066525	chr3.13384943-13390954	chr2.47994868-47989591	7	3	24	20	G2
1221	chr18.38178245-38203231	chr18.38438084-38463071	chr18.35330075-35355300	7	3	24	20	G2
1222	chr11.133631821-133640673	chr11.133423640-133432563	chr14.132260823-132269575	21	41	11	7	G2
1223	chr3.78978063-79003724	chr3.80910343-80936714	chr2.3279154-3304451	24	42	11	5	G2
1224	chr5.107012701-107029065	chr5.108828970-108845976	chr6.103961463-103977720	18	42	11	9	G2
1225	chr6.127358705-127372048	chr6.129207280-129220717	chr4.136925955-136912293	32	42	11	1	G2
1226	chr2.191509983-191514250	chr2b.196232682-196236946	chr12.54670119-54674300	22	37	10	10	G2
1227	chr6.26505977-26560829	chr6.26893208-26949785	chr4.26413800-26487981	18	37	9	12	G2
1228	chr18.38670004-38674161	chr18.38954831-38958963	chr18.35825183-35829334	26	37	9	8	G2
1229	chr1.47606809-47616105	chr1.48164544-48174312	chr1.50187190-50197877	26	36	10	8	G2
1230	chr6.127417945-127473467	chr6.129266593-129322651	chr4.136866626-136809703	28	36	10	7	G2
1231	chr8.79798349-79837130	chr8.77281580-77321142	chr8.81178308-93249132	26	36	10	8	G2
1232	chr18.38707792-38713625	chr18.38992912-38999003	chr18.35861550-35867325	27	36	10	8	G2
1233	chr21.46187272-46243261	chr21.45614926-45670234	chr3.823936-781278	21	36	10	11	G2
1234	chr1.94407114-94412279	chr1.95664556-95670263	chr1.97168185-97172341	22	39	11	8	G2
1235	chr19.23782474-23908702	chr19.24031219-24164883	chr19.22799073-22583134	30	39	11	5	G2
1236	chr2.163173379-163203281	chr2b.167325280-167353615	chr12.26183226-26212983	32	39	10	3	G2
1237	chr14.87842322-87850498	chr14.88380905-88389239	chr7.151504167-151512226	7	0	16	30	G2
1238	chr1.179956586-179968759	chr1.161353866-161366765	chr1.188973565-188961463	9	3	21	23	G2
1239	chr17.38099093-38103169	chr17.14834701-14831707	chr16.52815694-52819857	7	3	21	23	G2
1240	chr21.32014859-32026251	chr21.31468658-31480078	chr3.14788445-14777366	8	3	21	23	G2
1241	chr6.109369507-109409048	chr6.110794308-110834157	chr4.154946312-154907013	8	3	21	23	G2
1242	chr14.41336822-41349975	chr14.40804411-40817763	chr7.104813178-104826106	11	3	21	22	G2
1243	chr15.39974154-40238264	chr15.38925779-39197526	chr7.20314673-20570941	10	43	12	11	G2
1244	chr2.9642075-9642826	chr2a.9769072-9769823	chr13.9682209-9682959	21	42	13	5	G2
1245	chr5.172128507-172129217	chr5.175063195-175063905	chr6.169161008-169161718	14	39	12	11	G2
1246	chr2.163145314-163192218	chr2b.167296469-167342561	chr12.26155865-26201951	33	40	11	2	G2
1247	chr18.417152-649858	chr18.16383566-16140102	chr18.13671877-13440534	20	40	11	8	G2
1248	chr8.30294408-30514849	chr8.26903991-27131471	chr8.30558509-30786951	18	39	10	11	G2
1249	chr11.45219586-45221669	chr11.45730522-45732608	chr14.26875217-26873097	29	39	10	5	G2
1250	chr2.182472007-182475074	chr2b.187013989-187017062	chr12.45508620-45511679	18	38	10	11	G2
1251	chr2.191507856-191511778	chr2b.196230545-196234479	chr12.54667962-54671858	25	38	10	8	G2
1252	chr12.91009971-91028490	chr12.92993937-93017204	chr11.93310633-93329321	32	38	10	4	G2
1253	chr2.215957671-215979268	chr2b.221239683-221261682	chr12.79200079-79221937	15	38	11	12	G2
1254	chr4.159334692-159391350	chr4.162425355-162482999	chr5.150394267-150460066	29	38	11	5	G2
1255	chr6.94116646-94124732	chr6.94697093-94705192	chr4.89267246-89275439	23	35	8	12	G2
1256	chr2.67312412-67353629	chr2a.68714992-68756392	chr13.67520609-67561961	29	34	9	9	G2
1257	chr7.49879926-49896141	chr7.50767633-50785328	chr3.76530769-76511654	23	34	9	12	G2
1258	chr7.111417140-111450315	chr7.112085485-112122855	chr3.149385350-149419010	23	34	9	12	G2
1259	chr7.134338136-134450799	chr7.135501674-135647103	chr3.172495277-172595982	28	34	9	9	G2
1260	chr17.60205080-60401673	chr17.64092025-64146056	chr16.60321085-60369086	23	34	9	12	G2
1261	chr1.110734279-110908980	chr1.127381513-127202927	chr1.113457001-113623251	29	36	9	7	G2
1262	chr2.69996053-70014404	chr2a.71432078-71451660	chr13.70170969-70189337	21	36	9	11	G2
1263	chr3.23924728-23936311	chr3.24499544-24511489	chr2.166359793-166374386	23	36	9	11	G2
1264	chr5.19579791-19588540	chr5.96479561-96470812	chr6.19599331-19607998	19	36	9	12	G2
1265	chr18.4435146-4440453	chr18.12225913-12220933	chr18.9728889-9722255	31	36	9	6	G2
1266	chr4.139309095-139330389	chr4.141866627-141888228	chr5.130606834-130628983	26	35	10	9	G2
1267	chr5.150808867-150815488	chr5.153432731-153439607	chr6.147878452-147886030	26	35	10	9	G2
1268	chr6.116782853-116998667	chr6.118330209-118550629	chr4.147579737-147366442	27	35	10	8	G2
1269	chr9.74167582-74169015	chr9.71151904-71153337	chr15.81120049-81121474	27	35	10	8	G2
1270	chr21.26175464-26175850	chr21.25710690-25711078	chr3.20777929-20777539	25	35	10	10	G2
1271	chr14.64284126-64284929	chr14.64214482-64215280	chr7.127746221-127747009	10	3	23	20	G2
1272	chr15.29726260-29739162	chr15.28454912-28467742	chr7.9940835-9955196	7	3	23	21	G2
1273	chr3.290986-299429	chr3.331263-339736	chr2.60759978-60751514	5	3	23	22	G2
1274	chr3.14216874-14436021	chr3.14546217-14767683	chr11.83888097-84104080	7	3	23	21	G2
1275	chr4.187867854-187881792	chr4.191416317-191430303	chr5.178824064-178838624	6	3	23	21	G2
1276	chr6.166276115-166277699	chr6.169038605-169040118	chr4.162860772-162862207	8	3	23	20	G2
1277	chr1.179966022-179975470	chr1.161363691-161373994	chr1.188964189-188955138	7	2	17	27	G2
1278	chr11.85485483-85528609	chr11.84715206-84756907	chr14.84428468-84467454	2	2	17	30	G2
1279	chr14.41381104-41399203	chr14.40850118-40875066	chr7.104859529-104876583	9	2	18	26	G2
1280	chr2.58212584-58248881	chr2a.59459697-59496272	chr13.58350029-58382787	3	1	18	29	G2
1281	chr11.46349665-46350940	chr11.46888383-46889658	chr14.25755403-25754129	3	1	18	29	G2
1282	chr3.15504214-15539683	chr3.15863606-15899363	chr2.157818330-157854641	10	0	15	29	G2
1283	chr4.3445065-3450320	chr4.3610729-3616148	chr1.459498-454185	2	0	16	32	G2
1284	chr5.111033185-111088483	chr5.112908165-112963475	chr6.107955387-108009433	21	39	12	8	G2
1285	chr5.150811880-150818469	chr5.153436193-153442603	chr6.147882682-147888922	18	39	12	9	G2
1286	chr7.31117018-31123780	chr7.31469340-31476085	chr3.95115467-95108704	29	37	10	6	G2
1287	chr18.38667388-38671566	chr18.38952211-38956366	chr18.35822582-35826730	26	37	10	8	G2
1288	chr1.245386753-245425333	chr1.228270770-228310350	chr1.209825422-209776590	24	37	11	8	G2
1289	chr5.95276233-95313233	chr5.19590850-19553912	chr6.92129856-92167509	28	37	11	6	G2
1290	chr6.26499586-26521596	chr6.26886595-26909474	chr4.26407418-26430929	24	37	11	8	G2
1291	chr14.95630046-95817866	chr14.96384640-96578497	chr7.159326693-159518260	30	37	11	5	G2
1292	chr2.217688328-217758347	chr2b.222997350-223068385	chr12.80929413-80996930	32	35	9	6	G2
1293	chr3.70061020-70257915	chr3.71754893-71959616	chr2.66244159-66053966	27	35	9	9	G2
1294	chr16.87793892-87796549	chr16.89607394-89611156	chr20.87354770-87357406	21	35	9	12	G2
1295	chr6.135774239-135791531	chr6.137748344-137765909	chr4.128424396-128404140	28	35	10	8	G2
1296	chr12.28303572-28349872	chr12.60709208-60663843	chr11.28563274-28612328	31	35	10	7	G2
1297	chr2.120591436-120601782	chr2b.120766845-120777176	chr13.126313836-126332094	29	35	9	8	G2
1298	chr9.113349192-113349623	chr9.111002383-111002814	chr15.24634725-24634294	21	35	9	12	G2
1299	chr1.46824611-46846969	chr1.47381099-47404293	chr1.49512706-49535124	25	34	8	12	G2
1300	chr5.24571018-24578079	chr5.91440210-91433149	chr6.24549037-24556649	31	34	8	9	G2
1301	chr6.127476148-127497055	chr6.129325333-129346468	chr4.136807032-136786068	26	34	8	11	G2
1302	chr11.32910028-32910516	chr11.33148926-33149414	chr14.38878164-38877679	29	33	9	10	G2
1303	chr5.60100940-60137274	chr5.54981426-54944087	chr6.58474025-58512309	26	33	8	11	G2
1304	chr2.228591149-228591403	chr2b.234124178-234124432	chr12.91900549-91900803	28	32	9	10	G2
1305	chr2.53720979-53743505	chr2a.54915546-54937773	chr13.53908017-53930725	5	3	20	25	G2
1306	chr7.153478851-153480330	chr7.154792282-154793757	chr3.191137467-191138950	8	3	20	24	G2
1307	chr16.6515099-6520677	chr16.6723508-6729076	chr20.6700069-6705641	15	3	20	21	G2
1308	chr22.18620691-18624900	chr22.18738104-18742302	chr10.64326566-64330720	10	3	20	23	G2
1309	chr6.169713920-169793424	chr6.172677949-172760192	chr4.166489433-166575185	7	3	22	22	G2
1310	chr9.134924101-134955829	chr9.133123297-133155009	chr15.5574920-5543205	7	3	22	22	G2
1311	chr15.29766436-29793783	chr15.28495623-28523488	chr7.9981471-10008113	6	3	22	23	G2
1312	chr16.27793872-27998603	chr16.28308714-28515049	chr20.26324638-26534325	9	3	22	21	G2
1313	chr22.44864274-44868772	chr22.45273444-45278441	chr10.90099110-90103426	7	3	22	22	G2
1314	chr3.49669952-49672073	chr3.50835296-50837417	chr2.86764551-86762126	11	3	22	20	G2
1315	chr12.82016869-82029729	chr12.83807414-83820372	chr11.80080510-80090903	9	3	22	21	G2
1316	chr3.143115318-143123046	chr3.146602992-146610824	chr2.145937274-145929382	21	39	13	6	G2
1317	chr16.18713422-18720312	chr16.18893012-18899939	chr20.17787352-17794245	21	39	13	6	G2
1318	chr1.16151904-16227696	chr1.16163137-16244072	chr1.18754821-18833230	11	40	13	11	G2
1319	chr21.27133254-27213166	chr21.26658660-26738649	chr3.19827938-19746870	13	40	13	10	G2
1320	chr5.107865092-107977383	chr5.109679562-109795054	chr6.104851676-104956710	7	1	17	28	G2
1321	chr7.37018403-37068425	chr7.37482838-37533350	chr3.89220391-89170565	5	1	17	30	G2
1322	chr18.17324401-17347922	chr18.17243522-17267012	chr18.14482720-14506352	6	1	17	29	G2
1323	chrX.23294357-23303982	chrX.23485565-23494939	chrX.21172541-21182385	6	2	17	29	G2
1324	chr1.204607009-204615199	chr1.186755805-186763914	chr1.163993979-163986487	7	2	16	29	G2
1325	chr17.70122015-70154223	chr17.74158428-74190893	chr16.69876348-69916422	4	2	16	30	G2
1326	chr2.7203592-7252261	chr2a.7305348-7356736	chr13.7214171-7257318	28	39	11	5	G2
1327	chr18.38660230-38665352	chr18.38945042-38950177	chr18.35815263-35820570	26	39	11	6	G2
1328	chr7.98922275-98934239	chr7.99253781-99266928	chr3.46697128-46707424	26	36	10	8	G2
1329	chr10.5774749-5788128	chr10.5837724-5851357	chr9.5967122-5979858	25	36	10	9	G2
1330	chr18.38705878-38710191	chr18.38990995-38995319	chr18.35859599-35863939	28	36	10	7	G2
1331	chr2.47241395-47244419	chr2a.48286348-48289358	chr13.47273806-47277082	23	35	11	10	G2
1332	chr3.143078279-143085374	chr3.146563926-146571069	chr2.145971972-145964531	26	35	11	8	G2
1333	chr4.23645280-23660401	chr4.24132609-24148131	chr5.18795086-18810881	20	35	11	11	G2
1334	chr4.159367977-159405425	chr4.162458566-162497001	chr5.150434575-150474963	28	35	11	7	G2
1335	chr5.137829610-137869870	chr5.140198396-140241404	chr6.134882524-134924456	15	35	11	13	G2
1336	chr5.142639857-142641717	chr5.145088036-145089914	chr6.139716845-139718683	23	35	11	9	G2
1337	chr6.2234466-2335835	chr6.2291336-2397346	chr4.2175517-2274516	31	35	11	5	G2
1338	chr7.64040105-64087775	chr7.64586694-64637059	chr3.60488834-60409942	28	35	11	7	G2
1339	chr9.14637709-14643539	chr9.15023898-15029711	chr15.62258385-62252524	27	35	11	8	G2
1340	chr18.38701508-38705668	chr18.38986559-38990785	chr18.35855246-35859389	28	35	11	7	G2
1341	chr21.14400631-14665382	chr21.14188623-14457463	chr3.32796683-32524125	28	35	11	7	G2
1342	chr3.129128177-129148614	chr3.132332752-132353445	chr11.86920929-86902806	27	36	11	7	G2
1343	chr8.93939873-93966328	chr8.91653540-91679862	chr8.95456772-95483048	24	36	11	9	G2
1344	chr14.22833674-22838456	chr14.22251090-22256042	chr7.86134025-86139250	29	36	11	6	G2
1345	chr3.23935717-23936457	chr3.24510895-24511635	chr2.166373800-166374529	23	34	9	12	G2
1346	chr5.150824288-150829990	chr5.153448828-153454525	chr6.147897461-147903300	30	34	9	8	G2
1347	chr11.32911182-32911870	chr11.33150080-33150768	chr14.38877013-38876325	25	34	9	11	G2
1348	chr16.66392187-66423253	chr16.67557398-67589918	chr20.66126425-66160991	24	34	9	11	G2
1349	chr21.16602578-16610758	chr21.16409260-16417469	chr3.30586546-30577700	26	34	9	10	G2
1350	chr2.55105745-55106147	chr2a.56326407-56326809	chr13.55320022-55320424	31	34	10	7	G2
1351	chr9.97665100-97677462	chr9.95046468-95057929	chr15.107690008-107704999	25	34	10	10	G2
1352	chr12.99888895-99966729	chr12.102065085-102144489	chr11.102175517-102256302	24	34	10	11	G2
1353	chr3.140774208-140816692	chr3.144229169-144271604	chr2.148254155-148212776	28	32	8	11	G2
1354	chr6.100001014-100020419	chr6.101056919-101076450	chr4.95389718-95401756	30	32	8	10	G2
1355	chr2.198378417-198407105	chr2b.203188264-203219354	chr12.61400426-61438844	29	31	9	10	G2
1356	chr5.150853544-150859084	chr5.153478333-153485339	chr6.147926937-147932783	27	32	8	11	G2
1357	chrX.55224725-55225739	chrX.55598427-55599441	chrX.53597598-53598620	28	32	8	11	G2
1358	chr2.98914742-99091726	chr2a.99858967-100048882	chr13.98848328-99030434	10	0	14	30	G2
1359	chr14.41390401-41411466	chr14.40860172-40887336	chr7.104868572-104889415	8	0	14	31	G2
1360	chr1.204619357-204625655	chr1.186768073-186774359	chr1.163982341-163975718	6	3	19	26	G2
1361	chr6.144733719-144733808	chr6.146900456-146900545	chr4.119308342-119308254	13	3	19	24	G2
1362	chr11.6822858-6967347	chr11.6703417-6814587	chr14.65184374-65038040	5	3	19	27	G2
1363	chr16.7190562-7193652	chr16.7422874-7425970	chr20.7379227-7382511	10	3	19	24	G2
1364	chr4.21006649-21008713	chr4.21405951-21407922	chr5.16176174-16178140	11	3	19	23	G2
1365	chr15.73430080-73432580	chr15.73179538-73182593	chr7.54254863-54257363	5	3	19	26	G2
1366	chr22.18630289-18632203	chr22.18747742-18749640	chr10.64336714-64338644	7	3	19	25	G2
1367	chr1.179803972-179816666	chr1.161193177-161206011	chr1.189126118-189112898	7	3	18	26	G2
1368	chr3.382664-394568	chr3.424109-429864	chr2.60668855-60656492	10	3	18	25	G2
1369	chr3.184463232-184469870	chr3.188757703-188764068	chr2.103423999-103417095	13	3	18	23	G2
1370	chr20.34846434-34846570	chr20.33949449-33949585	chr10.27675813-27675677	15	3	18	23	G2
1371	chr19.23333521-23334849	chr19.23571325-23572649	chr19.22394693-22395728	24	41	14	3	G2
1372	chr11.45211852-45220735	chr11.45722845-45731675	chr14.26883064-26874051	30	39	13	2	G2
1373	chr12.55323564-55324863	chr12.32971271-32969964	chr11.53731906-53733204	26	39	13	4	G2
1374	chr18.38653219-38656800	chr18.38937721-38941304	chr18.35807535-35811918	26	39	13	4	G2
1375	chr3.107046011-107050469	chr3.109913652-109918356	chr2.25965720-25970470	22	39	13	6	G2
1376	chr4.139319827-139346005	chr4.141877668-141903838	chr5.130617774-130644757	16	39	13	9	G2
1377	chr19.23332560-23334271	chr19.23570358-23572071	chr19.22393720-22395150	27	39	12	4	G2
1378	chr1.24734960-24737117	chr1.24766050-24768219	chr1.27172358-27174825	18	39	13	8	G2
1379	chr5.44807078-44840724	chr5.70724618-70688013	chr6.44878952-44904303	28	39	13	3	G2
1380	chr12.55322965-55323922	chr12.32971870-32970913	chr11.53731305-53732260	28	39	13	3	G2
1381	chr1.14262947-14423071	chr1.14226829-14388581	chr1.16693949-16855647	23	37	11	8	G2
1382	chr3.8415328-8509171	chr3.8651306-8742185	chr2.52560633-52456882	31	37	11	4	G2
1383	chr3.52235929-52243148	chr3.53482447-53490341	chr2.84167558-84160656	11	37	11	14	G2
1384	chr15.60073899-60090020	chr15.59542692-59561634	chr7.40398556-40409313	23	37	11	8	G2
1385	chr16.66419652-66434093	chr16.67586318-67601031	chr20.66157444-66172864	17	37	11	11	G2
1386	chr17.2533471-2534007	chr17.2681790-2682326	chr16.2490311-2490857	28	37	11	6	G2
1387	chr17.19262923-19281739	chr17.36873745-36854931	chr16.18970301-18993994	33	37	11	3	G2
1388	chr1.24735674-24738683	chr1.24766771-24769778	chr1.27173052-27176739	22	37	12	8	G2
1389	chr4.88481756-88584089	chr4.90256660-90360638	chr5.80309380-80406006	24	37	12	7	G2
1390	chr5.142640797-142645015	chr5.145088976-145093085	chr6.139717784-139722056	24	37	12	7	G2
1391	chr1.43849554-43860376	chr1.44312189-44322997	chr1.46521308-46533074	11	3	21	22	G2
1392	chr1.166530017-166729339	chr1.147664917-147870460	chr1.198019477-198223500	7	3	21	23	G2
1393	chr7.37147350-37214349	chr7.37613970-37678862	chr3.89099804-89037408	6	3	21	24	G2
1394	chr7.99539020-99547497	chr7.99957946-99966995	chr3.47382304-47391025	10	3	21	22	G2
1395	chr14.61507264-61547673	chr14.61381081-61421444	chr7.124974235-125015112	5	3	21	25	G2
1396	chr16.7336833-7342074	chr16.7575921-7581146	chr20.7525558-7529956	12	3	21	21	G2
1397	chr6.41786842-41807413	chr6.42662913-42684224	chr4.41542556-41564095	7	3	21	23	G2
1398	chr14.41327834-41341281	chr14.40795416-40809128	chr7.104805508-104817662	5	3	21	24	G2
1399	chr15.60520045-60569076	chr15.59990378-60040871	chr7.40819407-40869428	10	3	21	21	G2
1400	chr19.1560893-1571167	chr19.1581980-1592260	chr19.1382043-1392175	13	3	21	20	G2
1401	chr3.79004188-79029264	chr3.80937178-80962174	chr2.3304928-3332445	30	35	11	6	G2
1402	chr4.78187785-78187983	chr4.53413226-53413028	chr5.52541350-52541129	23	35	11	10	G2
1403	chr12.90979789-90998628	chr12.92964079-92982592	chr11.93279898-93299279	30	35	11	6	G2
1404	chr15.67335493-67335773	chr15.67012625-67012905	chr7.47905941-47906221	23	35	11	10	G2
1405	chr18.38665499-38669077	chr18.38950324-38953899	chr18.35820716-35824270	26	35	11	8	G2
1406	chr6.73005493-73008303	chr6.73024151-73026957	chr4.68505346-68508078	28	35	10	7	G2
1407	chr4.145815234-145869914	chr4.148707931-148763914	chr5.136857161-136911885	23	33	10	11	G2
1408	chr8.56601378-56615074	chr8.53658636-53673204	chr8.58122861-58136257	28	33	10	9	G2
1409	chr10.21287440-21289843	chr10.21473154-21475549	chr9.21179357-21181774	26	33	10	10	G2
1410	chr16.18933260-18973581	chr16.19116185-19161156	chr20.17984370-18022989	24	33	10	11	G2
1411	chr18.38946134-38953367	chr18.39234405-39241622	chr18.36108026-36115253	25	33	9	11	G2
1412	chr1.54850222-54946217	chr1.55582054-55686571	chr1.57484863-57576910	30	32	10	9	G2
1413	chr5.133555359-133560917	chr5.135833631-135839182	chr6.130597896-130604010	24	32	10	11	G2
1414	chr7.23189642-23202822	chr7.23478769-23491945	chr3.103071731-103060276	28	32	10	9	G2
1415	chr15.87460691-87469770	chr15.86842396-86851506	chr7.68740195-68749559	28	32	10	9	G2
1416	chr8.32161828-32169082	chr8.28833160-28840441	chr8.32448125-32455285	10	2	15	28	G2
1417	chr2.58320273-58532670	chr2a.59568089-59784158	chr13.58455328-58646258	5	2	16	30	G2
1418	chr8.32164742-32171506	chr8.28836105-28842872	chr8.32451140-32457568	13	1	17	26	G2
1419	chr18.19891091-19914547	chr18.19869815-19894323	chr18.17081957-17105601	9	2	16	28	G2
1420	chr22.16741146-16747194	chr22.16794769-16802014	chr10.62575139-62580658	18	2	16	24	G2
1421	chr7.153391892-153393767	chr7.154709013-154710888	chr3.191034958-191036722	5	1	16	31	G2
* The total number of mapped reads were equalized among samples. All the values shown were rounded into integers.
** Group one (G1) contained Human1, Chimpanzee, and Macaque samples. Group two (G2) contained Human2, Chimpanzee, and Macaque samples.
B. Chimp Specific GW (559 identified in both G1 and G2, 317 only in G1, 458 only in G2).
ID	Human coordintes	Chimp coordinates	Macaque coordinates	Human1 expression	Human2 expression	Chimp expression	Macaque expression	identified in
1	chr1.5451899-5461396	chr1.5482585-5494724	chr1.8466252-8476068	0	0	50	0	G1,G2
2	chr5.17734904-17807619	chr5.18028237-18101383	chr6.17750828-17826659	0	0	50	0	G1,G2
3	chr6.153166937-153178846	chr6.155593554-155606487	chr4.110249570-110233906	0	3	48	0	G1,G2
4	chr1.239622393-239637893	chr1.222331902-222347408	chr1.215653055-215638886	0	0	49	1	G1,G2
5	chr9.135090314-135123787	chr9.133309641-133336815	chr15.5400736-5365399	0	0	49	1	G1,G2
6	chr21.45641104-45652229	chr21.45049088-45060183	chr3.1331418-1319958	0	0	49	1	G1,G2
7	chr21.45702994-45711978	chr21.45112790-45121814	chr3.1269890-1260382	0	0	49	1	G1,G2
8	chr9.135120875-135126891	chr9.133333895-133339927	chr15.5368336-5362270	0	0	47	3	G1,G2
9	chr1.239629046-239644329	chr1.222338561-222353850	chr1.215646722-215632750	0	0	49	0	G1,G2
10	chr12.77430933-77486184	chr12.79085328-79141449	chr11.75516564-75571342	1	0	49	0	G1,G2
11	chr14.73944311-73962538	chr14.74127408-74146706	chr7.137522881-137541181	0	0	43	6	G1,G2
12	chr21.45700247-45707173	chr21.45109661-45116981	chr3.1272705-1265802	1	0	48	1	G1,G2
13	chr21.45695364-45702774	chr21.45105004-45112570	chr3.1277258-1270124	1	1	47	1	G1,G2
14	chr6.153179067-153190834	chr6.155606708-155618462	chr4.110233689-110222332	1	1	48	0	G1,G2
15	chr12.77358275-77462574	chr12.79005729-79117606	chr11.75454295-75547843	1	1	48	0	G1,G2
16	chr17.36370139-36392333	chr17.16549860-16527615	chr16.51076378-51098981	0	1	49	0	G1,G2
17	chr21.45603066-45646546	chr21.45009265-45054535	chr3.1366751-1325844	0	0	49	1	G1,G2
18	chr21.45688925-45699681	chr21.45098566-45109095	chr3.1284802-1273273	0	1	49	0	G1,G2
19	chr6.153156115-153175112	chr6.155580352-155602709	chr4.110260466-110237631	0	2	48	0	G1,G2
20	chr2.155135663-155202931	chr2b.159140613-159209471	chr12.18189347-18263497	1	0	47	2	G1,G2
21	chr15.41288376-41404793	chr15.40330746-40450853	chr7.21652839-21761376	1	2	47	1	G1,G2
22	chr21.45649138-45659314	chr21.45057127-45067353	chr3.1323006-1312550	1	2	47	1	G1,G2
23	chr2.155102351-155163193	chr2b.159107678-159169450	chr12.18156948-18217587	0	1	48	1	G1,G2
24	chr6.153124576-153166337	chr6.155548771-155590980	chr4.110294202-110250170	0	2	47	1	G1,G2
25	chr6.153175482-153184814	chr6.155603079-155612478	chr4.110237261-110228355	0	3	47	0	G1,G2
26	chr3.149169164-149200322	chr3.152803399-152833534	chr2.139797495-139762562	1	0	46	3	G1,G2
27	chr15.41281625-41295780	chr15.40323309-40338130	chr7.21645849-21660150	0	0	46	3	G1,G2
28	chrX.71915314-72139734	chrX.72100847-72326599	chrX.71693827-72067345	0	0	46	3	G1,G2
29	chr9.135125074-135137668	chr9.133338109-133350851	chr15.5364129-5351071	0	0	46	3	G1,G2
30	chr20.1532505-1626046	chr20.1537806-1615650	chr10.34874877-35002034	0	2	45	3	G1,G2
31	chr3.149158988-149176613	chr3.152793314-152810538	chr2.139808302-139790271	1	3	44	4	G1,G2
32	chr21.45671581-45694611	chr21.45080769-45104251	chr3.1299508-1278006	0	1	44	4	G1,G2
33	chr21.45707425-45713007	chr21.45117238-45122843	chr3.1265545-1259477	0	5	44	2	G1,G2
34	chr2.111899341-111969002	chr2a.112357828-112428050	chr13.110804032-110873266	2	0	48	0	G1,G2
35	chr2.155044927-155057901	chr2b.159050014-159062979	chr12.18095937-18108832	2	0	48	0	G1,G2
36	chr6.31903844-31904826	chr6.32397247-32398229	chr4.31477300-31478285	2	0	48	0	G1,G2
37	chr12.56823779-57005545	chr12.31446416-31261442	chr11.55247361-55438216	2	1	48	0	G1,G2
38	chr2.155087825-155132355	chr2b.159092928-159137619	chr12.18142082-18186011	2	2	48	0	G1,G2
39	chr9.135127407-135188089	chr9.133340443-133418733	chr15.5361753-5217455	0	7	44	2	G1,G2
40	chr14.73942807-73949120	chr14.74125904-74132914	chr7.137521389-137527667	1	0	43	6	G1,G2
41	chr21.45652996-45670557	chr21.45060952-45079497	chr3.1319220-1300504	2	3	47	0	G1,G2
42	chr3.86617102-86751682	chr3.88773237-88906895	chr2.10766556-10891560	2	1	47	1	G1,G2
43	chr17.36273472-36379152	chr17.16650316-16540792	chr16.50979796-51085402	2	1	47	1	G1,G2
44	chr22.30959910-30978680	chr22.31123903-31143200	chr10.76130437-76149040	2	3	47	0	G1,G2
45	chrX.71850515-71929926	chrX.72025772-72115455	chrX.71643557-71708425	0	3	43	5	G1,G2
46	chr2.155065500-155085250	chr2b.159070579-159090364	chr12.18115982-18139912	2	5	46	0	G1,G2
47	chr6.153088577-153154543	chr6.155512834-155578780	chr4.110330838-110262037	2	0	46	2	G1,G2
48	chr14.95412345-95438473	chr14.96162091-96188464	chr7.159109103-159135420	2	2	46	1	G1,G2
49	chr3.861810-866586	chr3.882087-886863	chr2.60147939-60142904	2	6	45	0	G1,G2
50	chr3.198769594-198778350	chr3.203224925-203233677	chr2.187850872-187839947	0	3	42	6	G1,G2
51	chr11.19176878-19295555	chr11.19151776-19270658	chr14.52674829-52558326	0	4	41	6	G1,G2
52	chr21.45713085-45727400	chr21.45122921-45137711	chr3.1259399-1244641	2	4	44	2	G1,G2
53	chr12.56888120-57244272	chr12.31380851-31031960	chr11.55315107-55674413	2	3	45	2	G1,G2
54	chr9.132035507-132036252	chr9.130121093-130121838	chr15.8594188-8593441	34	34	0	16	G1,G2
55	chr2.210306035-210306320	chr2b.215424071-215424356	chr12.73522744-73523029	40	23	1	18	G1,G2
56	chr2.111784493-111857969	chr2a.112241902-112316615	chr13.110684590-110761126	1	0	40	9	G1,G2
57	chr1.239675740-239685526	chr1.222384374-222394152	chr1.215607745-215598180	2	0	44	4	G1,G2
58	chr2.111748937-111812662	chr2a.112206060-112271389	chr13.110645426-110713370	2	0	44	4	G1,G2
59	chr3.13597239-13647907	chr3.13933285-13985301	chr2.47448267-47400050	2	2	44	4	G1,G2
60	chr21.45662553-45688046	chr21.45070681-45097687	chr3.1309301-1285711	2	2	44	4	G1,G2
61	chr3.13630587-13656085	chr3.13967359-13993480	chr2.47417003-47391295	1	3	39	8	G1,G2
62	chr6.18372726-18459305	chr6.18613675-18702147	chr4.18310082-18400640	1	3	38	9	G1,G2
63	chr20.47368290-47401692	chr20.46754998-46789840	chr10.15155204-15123978	2	0	47	1	G1,G2
64	chr1.239681509-239690197	chr1.222390146-222398859	chr1.215602000-215593507	2	0	43	6	G1,G2
65	chr11.4172678-4555340	chr11.4141491-4400515	chr14.69380314-69125421	2	3	43	5	G1,G2
66	chr21.45712532-45722199	chr21.45122368-45132502	chr3.1259952-1250121	2	7	43	2	G1,G2
67	chr3.198766728-198771405	chr3.203221680-203226735	chr2.187853720-187849070	0	4	38	9	G1,G2
68	chr21.14903705-15014661	chr21.14708922-14817559	chr3.32277157-32171370	1	0	38	11	G1,G2
69	chr22.30950476-30966614	chr22.31114504-31130551	chr10.76121112-76136894	2	4	46	0	G1,G2
70	chr20.1608141-1677288	chr20.1602629-1642871	chr10.34978758-35062154	2	2	46	1	G1,G2
71	chr2.155075894-155099273	chr2b.159080971-159104591	chr12.18124770-18154077	2	5	45	0	G1,G2
72	chr3.149149696-149168066	chr3.152784082-152802305	chr2.139817922-139798557	1	3	36	11	G1,G2
73	chr4.178212144-178375543	chr4.181572109-181737692	chr5.169177356-169328602	2	2	44	3	G1,G2
74	chr2.57912694-58061617	chr2a.59154314-59310104	chr13.58040210-58203098	2	7	44	1	G1,G2
75	chr11.65446130-65482420	chr11.64372603-64414773	chr14.8528856-8489606	2	7	44	1	G1,G2
76	chr12.44114842-44254701	chr12.44371270-44225889	chr11.42443390-42589557	2	5	43	3	G1,G2
77	chr1.154909902-154915665	chr1.135889389-135896050	chr1.135282022-135288274	2	6	43	2	G1,G2
78	chr21.45722272-45734625	chr21.45132575-45146387	chr3.1250048-1239567	2	8	39	5	G1,G2
79	chr17.36246532-36368337	chr17.16677750-16551662	chr16.50954012-51074592	2	1	39	9	G1,G2
80	chr19.45115967-45169640	chr19.45493424-45545307	chr19.46315119-46370497	2	1	39	9	G1,G2
81	chr2.155038458-155051836	chr2b.159043216-159056919	chr12.18089516-18102816	3	2	47	0	G1,G2
82	chrX.75925172-76111461	chrX.76161667-76346502	chrX.75579040-75646347	3	2	47	0	G1,G2
83	chr2.47241139-47242456	chr2a.48286091-48287404	chr13.47273550-47274854	34	35	1	14	G1,G2
84	chr6.18404500-18502004	chr6.18645428-18744983	chr4.18342115-18440552	2	3	38	9	G1,G2
85	chr2.155059443-155074440	chr2b.159064527-159079516	chr12.18110036-18123330	3	4	45	0	G1,G2
86	chr4.80128699-80204216	chr4.51446238-51370405	chr5.50614067-50542064	2	0	41	8	G1,G2
87	chr11.65471712-65501665	chr11.64404080-64433713	chr14.8500996-8471645	2	3	41	6	G1,G2
88	chr5.17772798-17846093	chr5.18064048-18140690	chr6.17795581-17860435	2	6	41	4	G1,G2
89	chr2.57734515-57990566	chr2a.58971357-59238078	chr13.57859547-58125506	4	6	44	1	G1,G2
90	chr3.879953-924928	chr3.898222-943166	chr2.60127639-60084160	4	5	44	1	G1,G2
91	chr12.77465151-77711525	chr12.79120430-79410360	chr11.75550345-75805832	3	0	44	4	G1,G2
92	chr22.30916895-30959154	chr22.31088436-31123146	chr10.76103867-76129687	3	7	44	0	G1,G2
93	chr3.859107-863889	chr3.879379-884166	chr2.60150639-60145831	4	7	44	0	G1,G2
94	chr6.137632263-137995515	chr6.139622071-139992419	chr4.126576018-126209717	4	0	44	3	G1,G2
95	chr17.75790258-75809711	chr17.80359850-80379968	chr16.75663479-75683608	2	5	37	9	G1,G2
96	chr8.16378711-16467110	chr8.12649639-12730276	chr8.16356982-16451961	37	29	1	15	G1,G2
97	chr2.111858171-111940420	chr2a.112316817-112399194	chr13.110761328-110845223	3	3	43	3	G1,G2
98	chr6.170354517-170452054	chr6.173447694-173546519	chr4.167227771-167322411	4	4	42	3	G1,G2
99	chr7.116662166-116896933	chr7.117446278-117684923	chr3.154565450-154802309	4	3	43	3	G1,G2
100	chr2.111945796-112211105	chr2a.112405047-112680123	chr13.110850396-111136587	3	2	44	3	G1,G2
101	chr12.56658247-56885195	chr12.31615368-31383780	chr11.55077863-55312179	3	0	44	4	G1,G2
102	chr14.95421476-95459229	chr14.96171457-96210508	chr7.159118437-159156204	3	7	44	1	G1,G2
103	chr1.239685862-239698626	chr1.222394502-222407271	chr1.215597844-215585001	2	3	36	11	G1,G2
104	chr21.45756855-45757798	chr21.45171046-45172014	chr3.1217002-1216044	2	5	36	10	G1,G2
105	chr2.155053070-155064292	chr2b.159058149-159069367	chr12.18104046-18114780	5	3	46	0	G1,G2
106	chr21.46908989-15916379	chr21.46348124-15920130	chr3.126406-61676139	32	27	0	19	G1,G2
107	chr14.50522745-50523572	chr14.50192121-50192943	chr7.114034294-114035118	31	21	1	22	G1,G2
108	chr15.39925745-39930679	chr15.38873343-38878235	chr7.20265590-20270509	26	23	0	25	G1,G2
109	chr11.39640043-40024102	chr11.40010926-40432600	chr14.32297447-31928169	4	3	42	4	G1,G2
110	chr15.63263803-63308063	chr15.62807729-62855213	chr7.43651013-43707245	3	5	42	3	G1,G2
111	chr6.169930618-170379948	chr6.172899979-173470575	chr4.166711779-167251272	5	3	45	0	G1,G2
112	chr2.155032411-155043602	chr2b.159037156-159048707	chr12.18083226-18094692	5	4	45	0	G1,G2
113	chr12.57080857-57557732	chr12.31194954-30707032	chr11.55505077-56017625	2	2	38	9	G1,G2
114	chr21.14967852-15042965	chr21.14770669-14846014	chr3.32219618-32141862	2	2	38	9	G1,G2
115	chr15.39924481-39927132	chr15.38872088-38874727	chr7.20264324-20266990	26	32	0	21	G1,G2
116	chr2.57999275-58120882	chr2a.59246785-59369044	chr13.58134262-58265642	3	7	41	3	G1,G2
117	chr4.178360401-178590394	chr4.181722306-181959449	chr5.169312120-169547415	3	3	41	5	G1,G2
118	chr3.867488-889735	chr3.887784-907991	chr2.60142035-60117055	5	3	44	1	G1,G2
119	chr3.893534-948342	chr3.911318-966407	chr2.60110155-60061298	5	3	44	1	G1,G2
120	chr3.927844-988945	chr3.946089-1005269	chr2.60080657-60023340	5	3	44	1	G1,G2
121	chr6.2563329-2578247	chr6.2629915-2644837	chr4.2491493-2506347	5	6	44	0	G1,G2
122	chr17.68673807-68677551	chr17.72641575-72645321	chr16.68422543-68426542	30	31	0	18	G1,G2
123	chr21.45753803-45756731	chr21.45167983-45170922	chr3.1219942-1217126	4	3	40	6	G1,G2
124	chr16.45277207-45323288	chr16.45896764-45944378	chr20.44882694-44926832	3	3	40	6	G1,G2
125	chr1.213267984-213436923	chr1.195575084-195746874	chr1.155415096-155253665	3	3	41	5	G1,G2
126	chrX.119175599-119197937	chrX.119532473-119638226	chrX.118379588-118407748	3	2	41	6	G1,G2
127	chr6.153185690-153347301	chr6.155613354-155782311	chr4.110227466-110059088	3	4	40	5	G1,G2
128	chr15.86601797-86786089	chr15.85965229-86155235	chr7.67876649-68057828	3	4	40	5	G1,G2
129	chr20.47439218-47472841	chr20.46827246-46859862	chr10.15085327-15051152	4	2	40	7	G1,G2
130	chr7.154868691-154874743	chr7.156200603-156207008	chr3.192534644-192540972	5	6	43	1	G1,G2
131	chr14.50522354-50523133	chr14.50191730-50192504	chr7.114033906-114034679	24	12	0	31	G1,G2
132	chr3.864057-875416	chr3.884334-895708	chr2.60145663-60133928	5	3	45	0	G1,G2
133	chr8.122872534-122986138	chr8.121319968-121434927	chr8.124373840-124492035	5	7	42	1	G1,G2
134	chr2.107690937-108365961	chr2a.108870385-109627448	chr13.107419124-108165580	5	7	42	2	G1,G2
135	chr20.2095574-2390208	chr20.2064471-2359490	chr10.35477214-35770028	4	7	39	5	G1,G2
136	chr21.45755525-45757299	chr21.45169665-45171518	chr3.1218375-1216536	3	2	40	7	G1,G2
137	chr2.221998963-222015829	chr2b.227394886-227411776	chr12.85295663-85311594	31	15	2	24	G1,G2
138	chr15.63288482-63335654	chr15.62836203-62889672	chr7.43687283-43736858	5	3	44	1	G1,G2
139	chr7.78930985-78943942	chr7.78855900-78869630	chr3.137831102-137818219	28	25	0	22	G1,G2
140	chr17.68678074-68680993	chr17.72645844-72648779	chr16.68427065-68429994	28	18	0	26	G1,G2
141	chr4.80177837-80238391	chr4.51396844-51334162	chr5.50568576-50496905	2	2	35	12	G1,G2
142	chr8.79324943-79514525	chr8.76807629-76992630	chr8.80707913-80903089	2	7	35	9	G1,G2
143	chr20.1886435-1913491	chr20.1845431-1872971	chr10.35271873-35299040	5	9	41	1	G1,G2
144	chr12.69935713-70280198	chr12.71622129-71976582	chr11.68232912-68593723	5	8	41	2	G1,G2
145	chr20.47385916-47414825	chr20.46772660-46802902	chr10.15139748-15109809	5	3	41	5	G1,G2
146	chrX.119188858-119219001	chrX.119628935-119660171	chrX.118398932-118427453	4	0	38	9	G1,G2
147	chr21.45750190-45755512	chr21.45163176-45169652	chr3.1224472-1218388	4	3	38	8	G1,G2
148	chrX.76056720-76595096	chrX.76292834-76846945	chrX.75596916-76128434	5	3	40	6	G1,G2
149	chr20.1393973-1603556	chr20.1388337-1598022	chr10.34728500-34973781	5	5	40	4	G1,G2
150	chr1.5458193-5835831	chr1.5491372-5882271	chr1.8472921-8848353	5	3	40	6	G1,G2
151	chr5.100855068-101666122	chr5.102519715-103365569	chr6.97768836-98553488	4	3	37	9	G1,G2
152	chr8.143814357-143817106	chr8.142605993-142608738	chr8.145277731-145280562	4	11	37	5	G1,G2
153	chr3.117468769-117471881	chr3.120527978-120531128	chr2.36289985-36293081	26	23	1	24	G1,G2
154	chr2.203136078-203138067	chr2b.208062338-208064342	chr12.66424876-66426907	27	19	0	26	G1,G2
155	chr17.68677617-68678799	chr17.72645387-72646569	chr16.68426608-68427787	27	26	1	22	G1,G2
156	chr3.953485-1087245	chr3.971443-1109407	chr2.60056240-59930931	5	7	43	0	G1,G2
157	chr11.122434207-122434316	chr11.122011829-122011938	chr14.121411725-121411834	22	30	0	24	G1,G2
158	chr6.29680266-29680686	chr6.30116245-30116667	chr4.29338540-29338958	22	28	0	25	G1,G2
159	chr8.16254831-16377185	chr8.12479806-12648107	chr8.16236023-16355440	33	23	3	19	G1,G2
160	chr4.80210028-80298880	chr4.51364470-51272270	chr5.50536324-50426619	3	3	36	10	G1,G2
161	chr5.1575254-1626024	chr5.1575732-1625391	chr6.1196692-1248486	3	9	37	7	G1,G2
162	chr9.116265949-116296001	chr9.113940456-113971249	chr15.21663598-21634559	3	3	37	9	G1,G2
163	chr8.122585796-122930404	chr8.121024894-121377591	chr8.124077627-124434958	4	7	35	8	G1,G2
164	chr15.77890228-77900558	chr15.77749988-77761532	chr7.58929986-58940506	4	7	35	8	G1,G2
165	chr8.27374292-27392173	chr8.23933003-23950818	chr8.27610672-27629254	4	1	36	11	G1,G2
166	chr9.119216433-119221788	chr9.116945516-116951234	chr15.18672420-18667094	4	7	36	8	G1,G2
167	chr7.142278485-142293181	chr7.143630155-143645095	chr3.180516994-180532349	6	3	44	0	G1,G2
168	chr11.63977910-64010771	chr11.62861113-62894929	chr14.9963310-9931138	6	3	44	1	G1,G2
169	chr22.30968908-30990881	chr22.31132848-31155434	chr10.76139479-76160959	7	4	44	0	G1,G2
170	chr12.56638012-56799282	chr12.31636165-31469016	chr11.55055608-55223641	5	1	41	5	G1,G2
171	chr3.13532569-13630393	chr3.13866495-13967165	chr2.47517285-47417197	5	4	41	3	G1,G2
172	chr3.198772073-198784071	chr3.203227404-203239348	chr2.187848114-187834264	5	0	41	5	G1,G2
173	chr1.90559387-90620644	chr1.91780271-91841622	chr1.93006001-93073322	28	28	2	19	G1,G2
174	chr16.83686311-83750537	chr16.85370444-85434448	chr20.83244429-83312549	29	36	1	15	G1,G2
175	chr3.246155-255479	chr3.287330-296438	chr2.60805458-60796227	5	3	38	8	G1,G2
176	chr9.135025300-135118201	chr9.133231717-133331227	chr15.5472267-5371084	5	8	38	5	G1,G2
177	chr6.34144216-34153962	chr6.34792349-34802551	chr4.33766956-33776239	4	7	35	9	G1,G2
178	chr8.6669780-11889981	chr8.6881112-8288133	chr8.6907319-8765946	4	2	35	12	G1,G2
179	chr15.77819566-77879382	chr15.77674678-77739260	chr7.58865997-58919095	3	3	35	11	G1,G2
180	chr6.72865352-72869534	chr6.72878187-72882996	chr4.68385148-68389284	31	26	3	18	G1,G2
181	chr6.29680604-29681345	chr6.30116585-30119670	chr4.29338876-29339613	21	21	0	29	G1,G2
182	chr11.10775317-10777148	chr11.10749514-10751364	chr14.61146567-61144723	21	28	0	25	G1,G2
183	chr11.10775857-10777423	chr11.10750054-10751634	chr14.61146027-61144453	21	24	0	27	G1,G2
184	chr14.76652063-76652884	chr14.76910900-76913042	chr7.140257470-140258310	21	14	0	32	G1,G2
185	chr17.68679066-68684439	chr17.72646836-72653971	chr16.68428053-68434097	21	19	0	30	G1,G2
186	chr1.110061519-110080981	chr1.128072403-128051653	chr1.112769215-112801161	21	24	0	27	G1,G2
187	chr6.2528489-2562022	chr6.2593811-2628608	chr4.2453018-2490191	7	1	43	2	G1,G2
188	chr1.242429187-242448960	chr1.225212461-225232447	chr1.212890260-212871514	6	4	43	1	G1,G2
189	chr2.111695748-111777024	chr2a.112153044-112234336	chr13.110592889-110675798	6	2	43	2	G1,G2
190	chr4.122465179-122529244	chr4.124714761-124782829	chr5.113704968-113773902	5	3	40	5	G1,G2
191	chr6.150285703-150509705	chr6.152589420-152850617	chr4.113361769-112967286	5	7	37	6	G1,G2
192	chr14.22899262-22905679	chr14.22318927-22325775	chr7.86199968-86206089	5	7	37	7	G1,G2
193	chr1.143785073-143827545	chr1.114258597-114221941	chr1.123125534-123077966	28	34	1	17	G1,G2
194	chr2.111815533-111893329	chr2a.112274260-112351813	chr13.110716251-110798083	4	4	34	11	G1,G2
195	chr3.127315880-127334385	chr3.130492849-130511679	chr2.45893687-45912222	4	10	33	9	G1,G2
196	chr1.239590046-239628440	chr1.222298160-222337956	chr1.215685629-215647328	3	5	34	11	G1,G2
197	chr4.80079226-80176259	chr4.51495467-51398420	chr5.50661064-50570105	4	3	34	12	G1,G2
198	chr5.71812653-72148633	chr5.43464471-43131652	chr6.68623143-68974089	4	7	34	10	G1,G2
199	chr16.47588400-47641149	chr16.48271205-48323764	chr20.47200996-47249924	7	5	42	1	G1,G2
200	chr1.154908999-154913022	chr1.135888486-135892508	chr1.135281121-135285132	7	7	41	1	G1,G2
201	chr2.57584701-57882982	chr2a.58820178-59123898	chr13.57725869-58010715	7	7	41	1	G1,G2
202	chr1.154905197-154907104	chr1.135884688-135886591	chr1.135277347-135279229	7	6	42	1	G1,G2
203	chr6.54743427-55409377	chr6.56010882-56687949	chr4.54450534-55083820	31	28	3	17	G1,G2
204	chr15.52132314-52135244	chr15.51424124-51427034	chr7.32328673-32331587	23	18	1	28	G1,G2
205	chr7.30453912-30483477	chr7.30816396-30846234	chr3.95767310-95737395	5	11	35	6	G1,G2
206	chr2.127889979-127921511	chr2b.128255326-128287801	chr13.133864725-133896909	5	5	36	8	G1,G2
207	chr5.175276950-175391088	chr5.178293174-178412413	chr6.172367289-172508534	5	3	36	9	G1,G2
208	chr8.122945564-123023739	chr8.121392726-121473356	chr8.124450423-124530028	7	8	41	1	G1,G2
209	chr17.70166530-70178616	chr17.74203204-74215786	chr16.69928950-69941807	7	5	40	3	G1,G2
210	chr4.115335836-115396726	chr4.117735999-117802342	chr5.107056512-107121664	6	3	42	3	G1,G2
211	chr2.111651302-111740376	chr2a.112109806-112197563	chr13.110547117-110636553	6	2	41	4	G1,G2
212	chr12.77153782-77422093	chr12.78792834-79076214	chr11.75235775-75513928	6	2	41	4	G1,G2
213	chr6.34219789-34220834	chr6.34871428-34872895	chr4.33844699-33845732	4	8	32	11	G1,G2
214	chr15.41275177-41287528	chr15.40316846-40329898	chr7.21639187-21651986	3	6	34	11	G1,G2
215	chr21.45735617-45749920	chr21.45147990-45162906	chr3.1238764-1224984	3	10	34	9	G1,G2
216	chr14.61096183-61131836	chr14.60959780-60995584	chr7.124557543-124593033	3	7	33	11	G1,G2
217	chr17.68677173-68678043	chr17.72644943-72645813	chr16.68426164-68427034	27	29	1	20	G1,G2
218	chr9.78307255-78390975	chr9.75374293-75458383	chr15.85252791-85330629	30	23	3	20	G1,G2
219	chr11.11969142-11976816	chr11.11962682-11970365	chr14.59923760-59915905	30	25	3	19	G1,G2
220	chr11.106059649-106062239	chr11.105361398-105363985	chr14.105287136-105289717	30	24	3	20	G1,G2
221	chr1.242438878-242622419	chr1.225222150-225418070	chr1.212881650-212689780	5	3	39	6	G1,G2
222	chr7.87883210-87954877	chr7.88030246-88101620	chr3.128853526-128783210	5	11	39	2	G1,G2
223	chr8.59177828-59184770	chr8.56214939-56221866	chr8.60738968-60744275	5	9	38	4	G1,G2
224	chr13.23983261-24356181	chr13.24118145-24479192	chr17.4906049-4846941	5	9	38	4	G1,G2
225	chr10.22658298-22660029	chr10.22874491-22876004	chr9.22526657-22528392	19	16	0	32	G1,G2
226	chr11.10778224-10778443	chr11.10752433-10752652	chr14.61143670-61143451	19	23	0	29	G1,G2
227	chr11.118124246-118125955	chr11.117618133-117619737	chr14.117143128-117145143	23	23	0	26	G1,G2
228	chr4.115471372-115739471	chr4.117877304-118150877	chr5.107194031-107474781	5	8	35	8	G1,G2
229	chr6.137573856-137724437	chr6.139563647-139721204	chr4.126632721-126482468	5	6	35	9	G1,G2
230	chr9.116208526-116213908	chr9.113880173-113885566	chr15.21721578-21716205	5	2	35	11	G1,G2
231	chr15.86733568-86799921	chr15.86102098-86169108	chr7.68005484-68071416	5	5	35	10	G1,G2
232	chr22.24204568-24224150	chr22.24247682-24266732	chr10.69291675-69310872	7	7	40	2	G1,G2
233	chr1.55276962-55284954	chr1.56020704-56029154	chr1.57887827-57895777	6	9	41	1	G1,G2
234	chr6.2550803-2569439	chr6.2617430-2636022	chr4.2478447-2497582	6	5	41	3	G1,G2
235	chr11.63993377-64129476	chr11.62877535-63015107	chr14.9946642-9853978	6	6	40	3	G1,G2
236	chr7.87858382-87919573	chr7.88005711-88066812	chr3.128878078-128818270	7	11	40	1	G1,G2
237	chr8.69792054-69842587	chr8.67016517-67065074	chr8.71331782-71375656	7	11	40	1	G1,G2
238	chr19.3719874-3808736	chr19.3822301-3919524	chr19.3609283-3695529	7	11	40	1	G1,G2
239	chr11.11942319-11942454	chr11.11935892-11936026	chr14.59950546-59950412	26	29	1	21	G1,G2
240	chr6.32123610-32146852	chr6.32573298-32598966	chr4.31672879-31695734	28	27	3	19	G1,G2
241	chr6.86909234-87355036	chr6.87324067-87781124	chr4.82154951-82587023	28	28	3	19	G1,G2
242	chr11.14993361-15075725	chr11.14953307-15035671	chr14.56931268-56849495	7	3	42	2	G1,G2
243	chr3.252107-261322	chr3.293062-302262	chr2.60799605-60790057	5	3	37	8	G1,G2
244	chr3.66565648-66576730	chr3.68175914-68187305	chr2.69739597-69728513	5	8	37	5	G1,G2
245	chr16.45298650-45394142	chr16.45917350-46018990	chr20.44902010-45003732	5	3	37	8	G1,G2
246	chr2.127923502-127941975	chr2b.128289784-128308967	chr13.133899313-133919333	5	7	38	5	G1,G2
247	chr2.152131744-152305690	chr2b.156100382-156270436	chr12.15206565-15412779	5	7	34	10	G1,G2
248	chr8.17484042-17543092	chr8.13773002-13836076	chr8.17469023-17528382	5	4	34	11	G1,G2
249	chr9.116253025-116280766	chr9.113927520-113955666	chr15.21676723-21649706	6	7	39	4	G1,G2
250	chrX.75693146-75940473	chrX.75936036-76176986	chrX.75318163-75587136	6	4	39	5	G1,G2
251	chr7.158449928-158793840	chr7.159862411-160212184	chr3.196037104-196384663	6	5	40	4	G1,G2
252	chr4.115357771-115462211	chr4.117759571-117868234	chr5.107079164-107184871	7	3	41	3	G1,G2
253	chr9.87675676-87705416	chr9.84865721-84894801	chr15.94483975-94506883	7	8	41	0	G1,G2
254	chr5.35121072-35616845	chr5.80624338-80109884	chr6.34849713-35335685	5	3	36	9	G1,G2
255	chr8.142248913-142272577	chr8.140993436-141017345	chr8.143671503-143697191	5	9	36	6	G1,G2
256	chr8.73688452-73730883	chr8.71017051-71061208	chr8.75100113-75140992	8	4	43	0	G1,G2
257	chr5.35360755-35679091	chr5.80378750-80047406	chr6.35087446-35397237	6	3	39	6	G1,G2
258	chr19.56914396-57023139	chr19.57363588-57475288	chr19.57777312-57875065	7	10	38	3	G1,G2
259	chr9.35665609-35687483	chr9.36378953-36401496	chr15.41847045-41823903	5	10	33	9	G1,G2
260	chr20.2075603-2157674	chr20.2044546-2128148	chr10.35458383-35539122	5	5	33	11	G1,G2
261	chr17.70155700-70174123	chr17.74192394-74211295	chr16.69918476-69937252	7	1	40	5	G1,G2
262	chr4.154476175-154477121	chr4.157502019-157504339	chr5.145533826-145534764	21	35	1	21	G1,G2
263	chr11.11941651-11941855	chr11.11935224-11935428	chr14.59951211-59951007	21	25	1	26	G1,G2
264	chr9.92415518-92415804	chr9.89795489-89795775	chr15.102458216-102458502	21	23	0	28	G1,G2
265	chr2.53085617-53653543	chr2a.54256812-54851103	chr13.53260936-53839722	5	10	35	6	G1,G2
266	chr1.213380422-213623728	chr1.195689804-195936427	chr1.155307841-155049366	5	8	35	8	G1,G2
267	chr7.158745315-182367	chr7.160163177-138589	chr3.196336236-150221	5	7	35	8	G1,G2
268	chr8.423531-429498	chr8.389794-395767	chr8.368675-374412	5	7	35	8	G1,G2
269	chr21.46097249-46105885	chr21.45519853-45528492	chr3.912121-904219	5	5	35	9	G1,G2
270	chrX.106846717-106895281	chrX.107216045-107267876	chrX.106429085-106477879	5	7	35	8	G1,G2
271	chr20.1627058-1691680	chr20.1616669-1657238	chr10.35003065-35076309	8	3	43	1	G1,G2
272	chr7.154871252-154880568	chr7.156203170-156212835	chr3.192537507-192547052	9	5	41	1	G1,G2
273	chr3.139230435-139249732	chr3.142650000-142669303	chr2.149807344-149787561	8	6	42	0	G1,G2
274	chr4.166856495-166877283	chr4.169994421-170015974	chr5.157901431-157922015	17	25	0	29	G1,G2
275	chr19.35192003-35196355	chr19.35339326-35343672	chr19.36472315-36476389	27	32	3	17	G1,G2
276	chr6.122800840-122805966	chr6.124534861-124542850	chr4.141496773-141491889	23	31	2	20	G1,G2
277	chr2.17700262-17700405	chr2a.18013565-18013702	chr13.17598232-17598376	24	19	2	26	G1,G2
278	chr18.76020807-76058241	chr18.77137939-77178416	chr18.73406973-73444717	7	6	37	6	G1,G2
279	chr2.155172488-155256542	chr2b.159178621-159264032	chr12.18226538-18316857	6	4	37	7	G1,G2
280	chr14.95440946-95460898	chr14.96192238-96212178	chr7.159137912-159157876	6	7	37	5	G1,G2
281	chr2.127903741-127931178	chr2b.128269094-128297455	chr13.133878516-133907625	7	11	36	4	G1,G2
282	chr4.115402082-115601312	chr4.117807691-118004497	chr5.107126374-107321316	7	7	37	5	G1,G2
283	chr17.70131875-70165982	chr17.74168609-74202656	chr16.69886201-69928402	7	1	37	8	G1,G2
284	chr21.45740895-45753752	chr21.45153667-45167932	chr3.1232905-1219993	7	5	36	7	G1,G2
285	chr2.152204107-152328700	chr2b.156173729-156294280	chr12.15316625-15432295	7	3	39	5	G1,G2
286	chr7.21907566-22068715	chr7.22189934-22355192	chr3.104296427-104137286	7	10	39	2	G1,G2
287	chr8.69774215-69812482	chr8.66998645-67037478	chr8.71314154-71352062	7	6	39	4	G1,G2
288	chr8.69405066-69416061	chr8.66631778-66643227	chr8.70934168-70945236	7	7	39	3	G1,G2
289	chr20.47427451-47458645	chr20.46815512-46845685	chr10.15097190-15065333	7	3	39	5	G1,G2
290	chr2.57373518-57723429	chr2a.58611299-58959686	chr13.57510086-57849258	7	8	40	2	G1,G2
291	chr3.66558359-66571180	chr3.68168898-68181778	chr2.69747092-69734072	7	4	40	4	G1,G2
292	chr20.47338567-47383103	chr20.46725056-46769861	chr10.15186321-15142694	7	6	40	3	G1,G2
293	chr1.239638943-239649023	chr1.222348451-222357889	chr1.215638145-215628661	5	1	34	12	G1,G2
294	chr20.25155116-25158078	chr20.25575194-25578477	chr10.58421842-58425592	5	9	34	8	G1,G2
295	chr11.7467051-7528548	chr11.7322216-7384775	chr14.64504774-64443158	5	8	35	8	G1,G2
296	chr2.49043844-49193441	chr2a.50139471-50290850	chr13.49122927-49266860	8	8	41	0	G1,G2
297	chr11.113835611-113872177	chr11.113261762-113298465	chr14.112945868-112979227	8	7	41	1	G1,G2
298	chr3.139657386-139669148	chr3.143088762-143100531	chr2.149361994-149350276	8	7	41	0	G1,G2
299	chr2.155029174-155037749	chr2b.159033891-159042498	chr12.18079457-18088805	8	7	42	0	G1,G2
300	chr1.113387968-113459241	chr1.124664539-124584079	chr1.116036705-116111734	21	21	0	28	G1,G2
301	chr6.32143457-32159916	chr6.32595565-32612051	chr4.31692334-31709055	20	19	1	29	G1,G2
302	chr2.203137249-203138969	chr2b.208063516-208065246	chr12.66426099-66427810	20	27	0	26	G1,G2
303	chr4.154475995-154476310	chr4.157501839-157502154	chr5.145533646-145533963	20	39	0	20	G1,G2
304	chr1.154117957-154118849	chr1.135054747-135056585	chr1.134449373-134450286	26	21	3	24	G1,G2
305	chr5.9089637-9153421	chr5.9193044-9261651	chr6.8953777-9021270	26	30	3	19	G1,G2
306	chr5.133563988-133566955	chr5.135842238-135845358	chr6.130607394-130610370	26	27	3	20	G1,G2
307	chr2.53560678-53714544	chr2a.54758194-54908134	chr13.53742250-53899556	7	3	35	9	G1,G2
308	chr4.80243621-80357302	chr4.51328903-51212474	chr5.50491640-50368371	6	7	37	6	G1,G2
309	chr7.117475460-117590593	chr7.118271647-118394564	chr3.155364614-155479814	6	3	37	8	G1,G2
310	chr18.72820143-72820366	chr18.73900155-73900378	chr18.70430797-70431019	7	6	36	7	G1,G2
311	chr1.16136431-16139033	chr1.16147709-16150300	chr1.18739464-18742041	6	7	36	6	G1,G2
312	chr3.240599-251639	chr3.279169-292765	chr2.60811063-60799900	6	7	36	6	G1,G2
313	chr5.100266734-101395863	chr5.101897632-103106835	chr6.97177155-98284269	6	6	36	7	G1,G2
314	chr2.142581101-142588146	chr2b.146420245-146427558	chr12.5631243-5638118	23	37	2	18	G1,G2
315	chr1.110062002-110082453	chr1.128071920-128050194	chr1.112769698-112802630	23	27	1	23	G1,G2
316	chr6.29680700-29682127	chr6.30116681-30120443	chr4.29338972-29340385	15	20	0	32	G1,G2
317	chr10.22657560-22658956	chr10.22873757-6992220	chr9.22525915-22527315	16	21	0	31	G1,G2
318	chr11.122433779-122434262	chr11.122011425-122011884	chr14.121411294-121411780	16	23	0	31	G1,G2
319	chr17.70175722-70178997	chr17.74212890-74216167	chr16.69938842-69942189	7	7	38	4	G1,G2
320	chr8.73889172-74013868	chr8.71222133-71342052	chr8.75312651-75429132	9	3	40	3	G1,G2
321	chr1.55236126-55279447	chr1.55985770-56023189	chr1.57851951-57890319	9	8	40	1	G1,G2
322	chr1.154906027-154908091	chr1.135885517-135887578	chr1.135278155-135280213	9	7	40	2	G1,G2
323	chr1.242422885-242438472	chr1.225206165-225221744	chr1.212896544-212882053	9	8	40	1	G1,G2
324	chr6.150243941-150293759	chr6.152557278-152597459	chr4.113400763-113114317	8	6	40	2	G1,G2
325	chr14.65295402-65357044	chr14.65244577-65309271	chr7.128792580-128876547	8	7	40	2	G1,G2
326	chr16.47679453-47706525	chr16.48362040-48388798	chr20.47287604-47314028	8	7	40	1	G1,G2
327	chr2.152076247-152105130	chr2b.156044442-156073564	chr12.15150625-15180146	5	10	33	9	G1,G2
328	chr17.74976992-74979337	chr17.79178964-79181314	chr16.74729309-74731933	5	7	33	10	G1,G2
329	chr20.13749580-13924380	chr20.13911915-14094607	chr10.47104902-47275393	5	7	33	10	G1,G2
330	chr1.76368315-76387160	chr1.77428594-77447426	chr1.78967323-78986148	5	8	33	9	G1,G2
331	chr5.166338727-166380339	chr5.169192163-169234144	chr6.163339710-163381394	6	1	35	10	G1,G2
332	chr20.47462170-47484484	chr20.46849210-46872747	chr10.15061782-15040233	6	3	36	9	G1,G2
333	chr4.2096252-2141217	chr4.2207311-2253561	chr1.1831550-1787526	7	10	35	6	G1,G2
334	chr16.86661243-86981663	chr16.88440347-88768435	chr20.86212993-86534235	7	6	35	8	G1,G2
335	chr11.11942393-11942530	chr11.11935965-11936102	chr14.59950473-59950336	26	24	2	22	G1,G2
336	chr12.93634429-93693347	chr12.95691781-95752057	chr11.95942408-96001658	26	20	2	24	G1,G2
337	chr2.142585226-142591795	chr2b.146424353-146430860	chr12.5635178-5641051	25	31	3	19	G1,G2
338	chr4.41650730-41665577	chr4.42345140-42359702	chr5.36996287-37011713	19	19	1	29	G1,G2
339	chr6.5745415-5820767	chr6.5883800-5961388	chr4.5717836-5791134	7	9	37	4	G1,G2
340	chr6.34136970-34137400	chr6.34784959-34785391	chr4.33759235-33759667	23	18	1	28	G1,G2
341	chr2.190729355-190767326	chr2b.195447215-195484325	chr12.53849933-53884419	9	8	38	3	G1,G2
342	chr10.15618730-15679161	chr10.16151940-16213401	chr9.15832289-15894161	9	9	38	2	G1,G2
343	chr2.155024327-155031731	chr2b.159029044-159036474	chr12.18074678-18082218	8	9	40	1	G1,G2
344	chr8.73732911-73782429	chr8.71063240-71113944	chr8.75143020-75200370	10	1	43	1	G1,G2
345	chr8.73755806-73816751	chr8.71086969-71148271	chr8.75173708-75230180	10	0	43	1	G1,G2
346	chr1.111380450-111455562	chr1.126734472-126656696	chr1.114085210-114148918	7	5	34	9	G1,G2
347	chr4.103056798-103132653	chr4.105217375-105298892	chr5.94891387-94978244	7	8	34	8	G1,G2
348	chr14.41147265-41156865	chr14.40612711-40622302	chr7.104638672-104648307	7	0	34	12	G1,G2
349	chr14.22896540-22904171	chr14.22316207-22323826	chr7.86197226-86204587	6	10	34	7	G1,G2
350	chr1.239660465-239680674	chr1.222370436-222389311	chr1.215616885-215602844	7	5	36	7	G1,G2
351	chr3.270601-279301	chr3.311517-319523	chr2.60780267-60772134	7	3	36	8	G1,G2
352	chr11.21094686-21408511	chr11.21131884-21455247	chr14.50756093-50444654	7	7	36	6	G1,G2
353	chr2.140781764-140824493	chr2b.144587905-144633625	chr12.3812571-3855296	24	21	2	25	G1,G2
354	chr11.11981252-11986567	chr11.11974778-11980109	chr14.59911455-59906237	24	25	2	23	G1,G2
355	chr1.90519889-90580898	chr1.91739609-91801816	chr1.92959156-93027716	24	35	3	17	G1,G2
356	chr3.85115520-85117183	chr3.87229354-87231003	chr2.9296563-9298945	24	33	3	18	G1,G2
357	chr11.11940519-11941627	chr11.11934091-11935200	chr14.59952330-59951235	24	29	3	20	G1,G2
358	chr3.158027106-158329328	chr3.161834846-162135055	chr2.130838821-130530375	23	22	3	24	G1,G2
359	chr22.30980135-31107696	chr22.31144648-31264842	chr10.76150515-76300829	8	9	39	2	G1,G2
360	chr2.20562972-20659143	chr2a.20894902-20993110	chr13.20426999-20517967	9	9	37	3	G1,G2
361	chr3.178715252-179160544	chr3.182899658-183348821	chr2.109299143-108848946	8	8	38	3	G1,G2
362	chr11.113852143-113942573	chr11.113278265-113369210	chr14.112962436-113030641	8	8	38	3	G1,G2
363	chr8.69397558-69405989	chr8.66624248-66632697	chr8.70926876-70935087	10	7	40	1	G1,G2
364	chr6.34136759-34137160	chr6.34784748-34785151	chr4.33759025-33759427	21	18	2	28	G1,G2
365	chr6.32149297-32172037	chr6.32601401-32627125	chr4.31698215-31721272	21	19	1	28	G1,G2
366	chr11.11980478-11986088	chr11.11974006-11979629	chr14.59912228-59906714	21	23	1	26	G1,G2
367	chr3.63739232-63764693	chr3.65217613-65245059	chr2.72624055-72599611	10	3	42	1	G1,G2
368	chr7.78929700-78932452	chr7.78854613-78857591	chr3.137832368-137829634	26	27	4	19	G1,G2
369	chr21.15017327-15059441	chr21.14820226-14862512	chr3.32168715-32125626	7	7	33	9	G1,G2
370	chr1.16134677-16137318	chr1.16145950-16148594	chr1.18737671-18740352	7	7	32	10	G1,G2
371	chr6.37724182-37725144	chr6.38490713-38491674	chr4.37429434-37430400	7	5	32	11	G1,G2
372	chr11.65483642-65516239	chr11.64415883-64448257	chr14.8488407-8453876	7	7	32	10	G1,G2
373	chr16.54691645-54721311	chr16.55513015-55542647	chr20.54414529-54446912	7	8	32	10	G1,G2
374	chr7.88008179-88166010	chr7.88155182-88313682	chr3.128730838-128569220	6	7	34	9	G1,G2
375	chr11.7454189-7488691	chr11.7309717-7344500	chr14.64523230-64483109	6	7	34	9	G1,G2
376	chr18.54752667-54752773	chr18.55408127-55408233	chr18.52215755-52215861	13	13	0	36	G1,G2
377	chr2.23574853-23614595	chr2a.23988606-24032465	chr13.23405556-23445081	7	7	35	7	G1,G2
378	chr3.5718603-6854978	chr3.5859925-7027426	chr2.55294265-54147499	7	10	35	6	G1,G2
379	chr6.152999539-153121260	chr6.155427975-155545456	chr4.110418942-110297537	7	8	35	7	G1,G2
380	chr2.58284922-58296920	chr2a.59532896-59544908	chr13.58417745-58430133	7	5	35	8	G1,G2
381	chr10.15468802-15655215	chr10.15998754-16189104	chr9.15688155-15869225	7	9	35	6	G1,G2
382	chr3.52779712-52828001	chr3.54039123-54089708	chr2.83583191-83532665	9	7	37	4	G1,G2
383	chr21.35338276-36162393	chr21.34795787-35614808	chr3.11527076-10699919	9	6	37	5	G1,G2
384	chr1.224099085-224106873	chr1.206470474-206478235	chr1.144551884-144544502	9	9	36	4	G1,G2
385	chr8.69752884-69788321	chr8.66977290-67012762	chr8.71288484-71328086	9	7	36	5	G1,G2
386	chr3.139645074-139663365	chr3.143076473-143094748	chr2.149375205-149356061	8	11	38	2	G1,G2
387	chr12.44162020-44339701	chr12.44323804-44137249	chr11.42497088-42683050	8	7	38	4	G1,G2
388	chr15.54101292-54167642	chr15.53445958-53515853	chr7.34339932-34402959	8	3	38	7	G1,G2
389	chr6.34073226-34079024	chr6.34720245-34725998	chr4.33696145-33701880	10	9	39	1	G1,G2
390	chr22.24215066-24245906	chr22.24257689-24289664	chr10.69302212-69332826	10	9	39	1	G1,G2
391	chr1.148458943-148468098	chr1.129228786-129237871	chr1.128588706-128598205	23	31	2	20	G1,G2
392	chr5.133565219-133569614	chr5.135843627-135848035	chr6.130608611-130613033	23	24	3	23	G1,G2
393	chr8.20118225-20120560	chr8.16467119-16469456	chr8.20105250-20107865	23	19	3	26	G1,G2
394	chr14.61271623-61274697	chr14.61139490-61142557	chr7.124732204-124735249	23	20	3	25	G1,G2
395	chr2.187312024-187315374	chr2b.191954636-191959377	chr12.50350729-50354038	20	17	1	30	G1,G2
396	chrX.74923165-75180419	chrX.75155066-75430224	chrX.74734805-74902903	20	16	1	30	G1,G2
397	chr5.123018678-123018708	chr5.125160381-125160412	chr6.120045896-120045926	17	23	0	29	G1,G2
398	chr2.152106796-152192392	chr2b.156075226-156162009	chr12.15181815-15305072	7	8	32	10	G1,G2
399	chr17.70179014-70179537	chr17.74216184-74216707	chr16.69942206-69942730	7	8	32	10	G1,G2
400	chr18.38121802-38144854	chr18.38381238-38404295	chr18.35266304-35296419	6	6	32	11	G1,G2
401	chr1.90583153-90640535	chr1.91804066-91861950	chr1.93029836-93093089	26	22	3	23	G1,G2
402	chr9.28109080-28126355	chr9.28703977-28722140	chr15.49005535-48986719	25	22	4	22	G1,G2
403	chr11.106065963-106152433	chr11.105367708-105455026	chr14.105293425-105384667	25	22	4	22	G1,G2
404	chr2.23553952-23573130	chr2a.23967704-23986880	chr13.23384286-23403826	7	6	34	9	G1,G2
405	chr2.112011955-112251200	chr2a.112474804-112720033	chr13.110917010-111179483	7	3	34	10	G1,G2
406	chr7.10458772-10852277	chr7.10483501-10861767	chr3.25962504-115465986	7	4	34	9	G1,G2
407	chr11.113873986-114151805	chr11.113300276-113554873	chr14.112981402-113202260	7	7	34	8	G1,G2
408	chr18.72820380-72820611	chr18.73900392-73900623	chr18.70431033-70431264	7	7	34	8	G1,G2
409	chr5.745820-883995	chr5.827962-874356	chr6.450115-523916	8	8	37	4	G1,G2
410	chr19.6637868-6663305	chr19.6820244-6846484	chr19.6578293-6606432	8	8	37	4	G1,G2
411	chr12.90521582-90611149	chr12.92491918-92581965	chr11.92800694-92890234	8	11	36	4	G1,G2
412	chr14.41443211-41522501	chr14.40918887-40999373	chr7.104921884-105009552	8	7	36	6	G1,G2
413	chr5.136752647-136756062	chr5.139097250-139100669	chr6.133804842-133808300	8	6	36	6	G1,G2
414	chr4.115314501-115357156	chr4.117714641-117758956	chr5.107029646-107078549	10	8	38	2	G1,G2
415	chr9.17818910-17849505	chr9.18236606-18267266	chr15.59093780-59062543	10	8	38	2	G1,G2
416	chr17.28286631-28332896	chr17.24292154-24246245	chr16.28255430-28299252	10	4	38	4	G1,G2
417	chr19.23367936-23613716	chr19.23605390-23858542	chr19.22426945-22824550	10	8	38	2	G1,G2
418	chr20.10244945-10330402	chr20.10278730-10364686	chr10.43590394-43679900	10	11	38	1	G1,G2
419	chr9.17832611-17871154	chr9.18250380-18289235	chr15.59080016-59040054	10	9	38	2	G1,G2
420	chr11.63903070-63989694	chr11.62782992-62872903	chr14.10042741-9952418	10	7	38	3	G1,G2
421	chr19.6658618-6681820	chr19.6842161-6864310	chr19.6602119-6625179	10	5	38	4	G1,G2
422	chr4.166871475-166887214	chr4.170010027-170025886	chr5.157916380-157929933	13	24	0	31	G1,G2
423	chr2.222106120-222136008	chr2b.227503241-227533136	chr12.85402514-85432990	22	29	2	22	G1,G2
424	chr11.11941468-11941760	chr11.11935041-11935333	chr14.59951394-59951102	23	24	2	24	G1,G2
425	chr11.11953236-11962899	chr11.11946806-11956445	chr14.59939759-59929960	22	27	3	23	G1,G2
426	chr1.76678481-76711502	chr1.77739261-77774043	chr1.79283308-79315636	6	8	32	10	G1,G2
427	chr5.123018566-123018691	chr5.125160269-125160395	chr6.120045784-120045909	18	22	2	28	G1,G2
428	chr12.109642139-109642949	chr12.112009697-112010507	chr11.111657096-111657910	18	26	2	26	G1,G2
429	chr12.109642719-109643306	chr12.112010277-112010864	chr11.111657682-111658267	18	22	2	28	G1,G2
430	chr14.61273499-61275626	chr14.61141364-61146621	chr7.124734056-124736173	18	24	2	26	G1,G2
431	chr4.2397929-2439792	chr4.2519785-2563206	chr1.1558766-1517705	7	6	33	10	G1,G2
432	chr5.136716811-136721287	chr5.139050005-139054467	chr6.133767700-133772334	7	8	33	9	G1,G2
433	chr7.99097467-99113933	chr7.99437477-99454593	chr3.46861007-46878409	7	10	33	8	G1,G2
434	chr16.77748919-77794227	chr16.79211129-79258862	chr20.77338475-77384315	7	6	33	10	G1,G2
435	chr8.107840675-107994772	chr8.105884187-106043130	chr8.109216670-109371692	7	8	33	8	G1,G2
436	chr15.52307324-52309544	chr15.51600555-51602774	chr7.32518033-32520238	7	7	33	9	G1,G2
437	chr6.149206622-149243940	chr6.151496211-151536582	chr4.114451709-114421801	9	7	34	7	G1,G2
438	chr8.107858739-108275364	chr8.105902944-106329414	chr8.109233737-109646662	9	3	35	8	G1,G2
439	chr18.72820494-72820758	chr18.73900506-73900770	chr18.70431147-70431411	9	7	35	6	G1,G2
440	chr21.46812884-46843418	chr21.46251904-46282372	chr3.215722-193604	9	3	35	8	G1,G2
441	chr1.174442695-174713514	chr1.155773521-156038699	chr1.205811808-206055731	9	8	35	6	G1,G2
442	chr6.149438116-149449604	chr6.151732698-151744205	chr4.114228126-114216679	9	7	35	7	G1,G2
443	chr1.188454824-188483201	chr1.169982295-170010587	chr1.180451234-180420975	24	23	4	22	G1,G2
444	chr7.70815274-70848964	chr7.71527388-71562753	chr3.56931388-56966545	23	23	4	22	G1,G2
445	chr11.10777166-10777687	chr11.10751382-10751896	chr14.61144705-61144199	23	23	4	22	G1,G2
446	chr8.80940224-80993703	chr8.78445247-78498946	chr8.82292507-82353934	10	9	37	3	G1,G2
447	chr11.15029245-15394363	chr11.14988638-15355766	chr14.56895647-56541709	10	5	37	5	G1,G2
448	chr14.100381970-100382413	chr14.101273393-101273836	chr7.164128778-164129220	10	9	37	3	G1,G2
449	chr16.47610770-47659678	chr16.48293427-48342309	chr20.47223276-47268493	10	3	40	3	G1,G2
450	chr4.1111738-1121643	chr4.1174356-1184267	chr1.2834364-2824495	10	6	39	2	G1,G2
451	chr3.52488809-52490126	chr3.53740087-53741404	chr2.83896023-83894697	15	25	1	28	G1,G2
452	chr11.106054191-106058051	chr11.105355938-105359796	chr14.105281358-105285225	21	27	2	23	G1,G2
453	chr5.115937402-115968701	chr5.117902547-117933861	chr6.113077437-113110683	7	8	32	9	G1,G2
454	chr17.70178699-70179251	chr17.74215869-74216421	chr16.69941890-69942443	7	5	32	11	G1,G2
455	chr5.17398917-17769060	chr5.17683367-18060304	chr6.17541999-17792054	11	1	40	3	G1,G2
456	chr8.123458863-123484997	chr8.121916771-121942889	chr8.124962566-124994063	10	11	38	1	G1,G2
457	chr1.55295585-55304785	chr1.56039819-56049000	chr1.57906430-57915651	10	10	38	1	G1,G2
458	chr20.25155769-25161827	chr20.25575849-25582219	chr10.58422497-58428885	9	8	34	7	G1,G2
459	chr6.2390555-2547439	chr6.2446381-2612711	chr4.2320263-2471822	8	9	35	6	G1,G2
460	chr9.116179283-116209642	chr9.113849834-113881289	chr15.21751053-21720462	8	3	35	9	G1,G2
461	chr11.19145394-19220762	chr11.19119860-19196799	chr14.52707188-52632591	8	9	35	6	G1,G2
462	chr12.56479984-56488997	chr12.31802564-31793497	chr11.54887754-54897326	8	7	35	7	G1,G2
463	chr19.47650890-47712581	chr19.47938228-48002452	chr19.48779697-48838738	8	7	35	7	G1,G2
464	chr2.190659651-190725754	chr2b.195376958-195443627	chr12.53774479-53846880	10	11	36	3	G1,G2
465	chr6.149186835-149203635	chr6.151476302-151493221	chr4.114469222-114454643	10	9	36	4	G1,G2
466	chr1.150274376-150486632	chr1.131116261-131331099	chr1.130531074-130750972	10	10	35	4	G1,G2
467	chr4.11052899-11348048	chr4.11217673-11513634	chr5.6306202-6593311	10	8	35	5	G1,G2
468	chr6.149440269-149610422	chr6.151734850-151909586	chr4.114225968-114053713	10	7	35	5	G1,G2
469	chr8.59183586-59188562	chr8.56220681-56225654	chr8.60743097-60748412	10	7	35	5	G1,G2
470	chr2.140748499-140809695	chr2b.144554357-144618767	chr12.3784784-3840172	23	23	3	23	G1,G2
471	chr2.142341229-142356191	chr2b.146178195-146193125	chr12.5392207-5407085	23	29	3	20	G1,G2
472	chr7.78927601-78929663	chr7.78852512-78854576	chr3.137834564-137832405	23	23	3	23	G1,G2
473	chr17.1501762-1505547	chr17.1638004-1612809	chr16.1452708-1457171	23	23	4	23	G1,G2
474	chr1.111001591-111014003	chr1.127113630-127101211	chr1.113718720-113729555	23	22	4	23	G1,G2
475	chr11.11942193-11942385	chr11.11935766-11935957	chr14.59950672-59950481	18	26	1	26	G1,G2
476	chr3.60904401-61014856	chr3.62361430-62472223	chr2.75438651-75332144	15	15	1	34	G1,G2
477	chr7.78935495-78983338	chr7.78861052-78910591	chr3.137827614-137779168	15	14	1	34	G1,G2
478	chr8.69879431-69914543	chr8.67102795-67144168	chr8.71415188-71454019	11	7	39	1	G1,G2
479	chr6.149154161-149166513	chr6.151443576-151455972	chr4.114502587-114489511	10	3	35	8	G1,G2
480	chr12.56489771-56496730	chr12.31792726-31785769	chr11.54898106-54905141	10	7	35	6	G1,G2
481	chr4.44354016-44372408	chr4.45100747-45119126	chr5.39799203-39818560	10	9	35	5	G1,G2
482	chr5.127289290-127311386	chr5.129489472-129511728	chr6.124330136-124352338	10	9	35	5	G1,G2
483	chr6.37730251-37734059	chr6.38496771-38500588	chr4.37435840-37439651	10	5	35	7	G1,G2
484	chr8.69381432-69396534	chr8.66609246-66623225	chr8.70911111-70925854	10	9	35	5	G1,G2
485	chr20.692435-958205	chr20.736912-957075	chr10.34037699-34307531	10	3	35	8	G1,G2
486	chr3.128878706-128879932	chr3.132077780-132079006	chr11.87165372-87164160	8	10	33	7	G1,G2
487	chr4.122491929-122808906	chr4.124741481-125065335	chr5.113734836-114032836	8	7	33	8	G1,G2
488	chr16.77143531-77153011	chr16.78597483-78606967	chr20.76729308-76739396	8	10	33	7	G1,G2
489	chr5.750616-896788	chr5.832581-111841318	chr6.454926-546054	9	8	33	8	G1,G2
490	chr9.138856924-138859220	chr9.137075228-137076218	chr15.1415775-1413493	9	4	33	10	G1,G2
491	chr4.37124466-37133338	chr4.37722259-37735846	chr5.32428316-32437159	9	6	32	10	G1,G2
492	chr5.136706709-136710839	chr5.139039900-139044037	chr6.133757474-133761726	9	7	32	9	G1,G2
493	chr6.34164507-34167072	chr6.34813557-34816130	chr4.33786986-33789557	9	5	32	10	G1,G2
494	chr6.37722924-37724654	chr6.38489451-38491185	chr4.37428352-37429910	9	7	32	9	G1,G2
495	chr6.37732614-37739726	chr6.38499142-38506253	chr4.37438226-37445323	9	5	32	10	G1,G2
496	chr19.56941858-57056770	chr19.57391466-57510356	chr19.57799245-57910576	9	7	32	9	G1,G2
497	chr2.111595464-111688725	chr2a.112046377-112145673	chr13.110490704-110586531	8	7	34	8	G1,G2
498	chr3.66571729-66581964	chr3.68182327-68192556	chr2.69733521-69723110	8	9	34	7	G1,G2
499	chr6.37712603-37713392	chr6.38479218-38480007	chr4.37417865-37418662	8	9	34	7	G1,G2
500	chr4.174558688-174577856	chr4.177871305-177890813	chr5.165455764-165474948	20	25	3	24	G1,G2
501	chr1.107914864-107914945	chr1.109260742-109260823	chr1.110480111-110480192	22	23	4	23	G1,G2
502	chr1.171721180-171884613	chr1.152985832-153160539	chr1.203130717-203296221	21	25	4	22	G1,G2
503	chr2.7352213-7477161	chr2a.7460012-7589844	chr13.7359992-7486739	21	23	4	23	G1,G2
504	chr2.222124621-222138449	chr2b.227521694-227535597	chr12.85421728-85435441	21	23	4	23	G1,G2
505	chr8.12924528-12925207	chr8.8982073-8982764	chr8.12780810-12781493	22	21	4	24	G1,G2
506	chr17.27346057-27501999	chr17.25245415-25079484	chr16.27199698-27499794	22	21	4	24	G1,G2
507	chr7.78923916-78926829	chr7.78848843-78851740	chr3.137838288-137835333	23	22	3	24	G1,G2
508	chr3.139082391-139227712	chr3.142502208-142647290	chr2.149950051-149810075	12	7	38	2	G1,G2
509	chr2.152317071-152336437	chr2b.156282482-156302055	chr12.15420791-15440573	11	8	39	1	G1,G2
510	chr20.25441517-25480550	chr20.25867431-25915256	chr10.58727627-58772802	11	8	39	1	G1,G2
511	chr7.87957741-88062853	chr7.88104504-88210181	chr3.128780307-128676554	12	6	37	3	G1,G2
512	chr6.119079304-119229688	chr6.120661070-120813462	chr4.145345921-145191247	10	9	36	3	G1,G2
513	chr8.59209088-59221087	chr8.56246203-56258277	chr8.60768850-60780848	10	9	36	3	G1,G2
514	chr12.90469160-90549560	chr12.92439904-92520506	chr11.92744320-92828721	10	9	36	3	G1,G2
515	chr3.160197527-160371347	chr3.164056016-164227982	chr2.128698232-128537588	10	11	36	3	G1,G2
516	chr7.87925612-88000995	chr7.88072856-88148007	chr3.128813214-128736361	10	11	36	3	G1,G2
517	chr20.10241061-10250186	chr20.10274826-10283750	chr10.43586484-43595899	10	10	36	3	G1,G2
518	chr20.47474094-47496630	chr20.46861235-46884923	chr10.15049893-15027813	10	4	36	6	G1,G2
519	chr1.4750532-5457660	chr1.4728286-5490666	chr1.7752257-8472218	10	6	34	8	G1,G2
520	chr11.92270803-92472203	chr11.91429897-91632253	chr14.91483343-91663812	10	6	34	8	G1,G2
521	chr1.76357665-76376521	chr1.77417994-77436809	chr1.78955981-78975723	10	7	34	7	G1,G2
522	chr5.136750540-136753828	chr5.139095142-139098431	chr6.133802737-133806021	10	8	34	6	G1,G2
523	chr8.59141093-59150773	chr8.56177530-56187214	chr8.60702455-60712111	10	7	34	7	G1,G2
524	chr18.72820250-72820490	chr18.73900262-73900502	chr18.70430903-70431143	10	4	34	8	G1,G2
525	chr4.119271177-119278143	chr4.121703878-121710830	chr5.110983952-110990909	9	3	32	11	G1,G2
526	chr1.76618368-76664573	chr1.77681770-77728010	chr1.79217146-79263117	9	7	31	10	G1,G2
527	chr8.59122420-59132727	chr8.56159193-56169155	chr8.60683708-60694035	9	8	31	9	G1,G2
528	chr20.42833380-42867880	chr20.42109501-42144393	chr10.19660381-19627111	9	8	31	9	G1,G2
529	chr3.49667206-49668039	chr3.50832550-50833383	chr2.86767297-86766464	8	3	33	11	G1,G2
530	chr6.34159601-34162634	chr6.34808185-34811742	chr4.33782053-33785061	8	8	33	8	G1,G2
531	chr6.149162179-149174439	chr6.151451626-151463894	chr4.114493785-114481382	8	6	33	10	G1,G2
532	chr9.12278006-12754834	chr9.12610987-13103866	chr15.64687656-64163385	8	4	33	10	G1,G2
533	chr9.116228148-116252387	chr9.113900722-113926879	chr15.21701662-21677356	8	7	33	9	G1,G2
534	chr11.19229891-19353672	chr11.19205921-19332637	chr14.52623469-52497993	8	7	33	9	G1,G2
535	chr14.41152443-41164041	chr14.40617880-40629472	chr7.104643874-104656131	8	4	33	10	G1,G2
536	chr19.47619414-47667183	chr19.47908071-47954144	chr19.48749064-48795215	8	3	33	11	G1,G2
537	chr1.76715093-76741384	chr1.77777633-77803337	chr1.79319193-79339758	8	7	32	10	G1,G2
538	chr2.236102036-236116195	chr2b.241775093-241792413	chr12.99393462-99408596	8	8	32	9	G1,G2
539	chr4.177912620-178353937	chr4.181261571-181714136	chr5.168858451-169308293	8	8	32	9	G1,G2
540	chr11.438862-451029	chr11.481819-494472	chr14.256779-271182	8	4	32	11	G1,G2
541	chr9.92415674-92418864	chr9.89795645-89798831	chr15.102458372-102462208	19	27	2	24	G1,G2
542	chr1.119552980-119605293	chr1.118360223-118307520	chr1.122109444-122159648	11	11	37	1	G1,G2
543	chr9.21065607-21155843	chr9.21564417-21657540	chr15.55918103-55823589	11	9	37	2	G1,G2
544	chr1.55287467-55294616	chr1.56031673-56038812	chr1.57898308-57905433	12	9	37	2	G1,G2
545	chr3.98737800-98791646	chr3.101399491-101451981	chr2.17914648-17962250	12	9	37	2	G1,G2
546	chr11.115144694-115281445	chr11.114567401-114707992	chr14.114192488-114322129	12	7	37	3	G1,G2
547	chr4.115272919-115313332	chr4.117673950-117713462	chr5.106994219-107028460	11	7	38	2	G1,G2
548	chr20.47414905-47418185	chr20.46802982-46806251	chr10.15109729-15106425	11	4	38	4	G1,G2
549	chr2.142348802-142361953	chr2b.146185747-146198863	chr12.5399727-5412805	21	30	4	20	G1,G2
550	chr2.142390967-142413323	chr2b.146227814-146250213	chr12.5441708-5463636	21	28	4	21	G1,G2
551	chr5.71690090-71698488	chr5.43588564-43580195	chr6.68504960-68513401	21	26	4	22	G1,G2
552	chr2.3102058-3138921	chr2a.4717641-4754938	chr13.4647298-4684537	10	4	35	7	G1,G2
553	chr5.136678848-136686542	chr5.139011365-139018731	chr6.133732226-133739622	10	6	35	6	G1,G2
554	chr2.3089701-3121693	chr2a.4703982-4737782	chr13.4635332-4669703	10	4	33	9	G1,G2
555	chrX.119199241-119225168	chrX.119639530-119666345	chrX.118409042-118434227	10	4	33	9	G1,G2
556	chr21.46810819-46840966	chr21.46249840-46279918	chr3.218105-196151	10	3	33	10	G1,G2
557	chrX.6805619-6906239	chrX.6712832-6815121	chrX.4478178-4565077	10	7	33	8	G1,G2
558	chr12.132144703-132148354	chr12.135196053-135199713	chr11.134326051-134330008	23	23	5	22	G1,G2
559	chr12.26108928-26113484	chr12.62939711-62935149	chr11.26342605-26347186	16	28	2	26	G1,G2
560	chr6.31903630-31904045	chr6.32397033-32397448	chr4.31477088-31477501	0	19	40	0	G1
561	chr8.91962474-92040637	chr8.89664024-89743131	chr8.93516939-93601764	41	9	2	23	G1
562	chr9.8863101-9000628	chr9.9036645-9183522	chr15.68265441-68123808	31	2	0	33	G1
563	chr6.31904065-31905396	chr6.32397468-32398799	chr4.31477521-31478855	2	12	42	0	G1
564	chr21.45727698-45740584	chr21.45138009-45153356	chr3.1244343-1233220	1	11	33	10	G1
565	chr4.118525039-118724412	chr4.120938060-121140608	chr5.110279676-110472308	28	3	0	34	G1
566	chr11.26243076-26649116	chr11.26345549-26766643	chr14.45542036-45130410	39	8	3	23	G1
567	chr19.45079378-45138316	chr19.45455926-45516322	chr19.46257486-46332980	2	0	35	13	G1
568	chr12.47808822-47810194	chr12.40610510-40609159	chr11.46255759-46257121	29	39	1	14	G1
569	chr16.53773026-54133324	chr16.54570783-54939510	chr20.53418368-53787597	4	11	36	5	G1
570	chr1.81683482-81937862	chr1.82826609-83090034	chr1.84255838-84506322	29	0	1	34	G1
571	chr8.143813216-143815592	chr8.142604852-142607226	chr8.145276178-145278945	4	12	34	7	G1
572	chr3.127336930-127356088	chr3.130514860-130534027	chr2.45914811-45934282	4	13	34	7	G1
[truncated: 5,502 more rows]
